# Supplementary material for: Convenient synthesis of substituted tetrahydrofuran via Lewis base catalyzed [3 + 2] domino reactions
Source: Royal Society of Chemistry journal article supplement (doi:10.1039/c4ra09249j), 2014-01-01

## Supporting information for

### **Convenient Synthesis of Substituted Tetrahydrofuran via Lewis Base Catalyzed [3+2] Domino Reactions**

Yufen Liu, Qi Zhang, Yanlong Du, Aimin Yu, Kui Zhang and Xiangtai Meng

#### Contents

|                                                             |    |
|-------------------------------------------------------------|----|
| 1. General Information.....                                 | 2  |
| 2. Materials.....                                           | 2  |
| 3. General procedure for the synthesis of <b>1</b> .....    | 2  |
| 4. General procedure for the [3+2] annulation reaction..... | 5  |
| 5. Representative spectra of <b>3</b> .....                 | 29 |
| 6. 2D NMR.....                                              | 72 |
| 7. X-Ray crystal structure of <b>3I-E,E</b> .....           | 74 |

## 1. General Information

TLC monitored all reactions with silica gel-coated plates. Flash column chromatography was performed using 200-300 mesh silica gel.  $^1\text{H}$ - and  $^{13}\text{C}$ -NMR spectra were recorded at ambient temperature on Bruker 400 instruments using tetramethylsilane as an external standard. HRMS were obtained on Waters Xevo Q-TOF MS with ESI resource. Melting points were measured on a RY-I apparatus and are reported uncorrected. All the solvents were purified by standard methods.

## 2. Materials

Unless otherwise noted, all commercially available compounds were used without further purification, substrate **1f**, **1g**, **1h** were prepared according to known literature procedures.<sup>[1]</sup>

## 3. General procedure for the synthesis of **1**

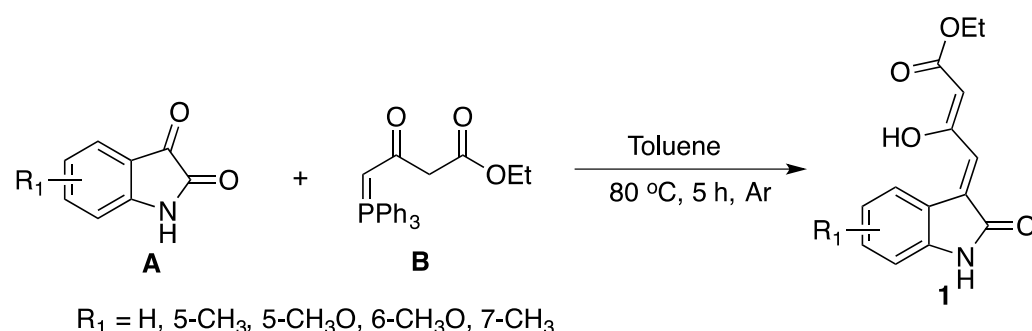

To a dried and argon-filled two neck round bottle was added isatin derivatives **A** (3 mmol) and ylide **B** (4.5 mmol) in toluene 10 ml, the mixture was stirred at 80 °C and monitored by TLC until completion of the reaction. After purification by column chromatography on silica gel (Ethyl acetate/petroleum = 1: 2) the desired product **1** was obtained as a solid.

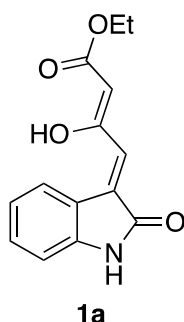

### Ethyl-(*Z*)-3-hydroxy-4-((*E*)-2-oxoindolin-3-ylidene)but-2-enoate (**1a**)

Orange solid; Yield 20%, m.p. 114-115 °C;  $^1\text{H}$  NMR (400 MHz,  $\text{CDCl}_3$ )  $\delta = 12.38$  (d,  $J = 2.0$  Hz, 1H), 8.60 (s, 1H), 8.40 (d,  $J = 8.0$  Hz, 1H), 7.26 (td,  $J = 7.8, 1.2$  Hz, 1H), 7.02

(td,  $J = 7.6, 0.8$  Hz, 1H), 6.87 (d,  $J = 1.6$  Hz, 1H), 6.85 (s, 1H), 5.53 (s, 1H), 4.29 (q,  $J = 7.2$  Hz, 2H), 1.34 (t,  $J = 7.2$  Hz, 3H) ppm;  $^{13}\text{C}$  NMR (100MHz,  $\text{CDCl}_3$ )  $\delta = 172.39, 167.49, 142.82, 133.63, 131.37, 129.01, 127.42, 122.64, 121.02, 110.05, 99.08, 60.87, 50.75, 14.17$  ppm; ESI-HRMS: calcd. for  $^+ \text{C}_{14}\text{H}_{13}\text{NO}_4 + \text{H}$  260.0923, found 260.0934.

**Ethyl-(Z)-3-hydroxy-4-((E)-5-methyl-2-oxoindolin-3-ylidene)but-2-enoate (1b)**

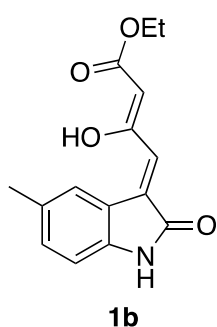

Reddish orange solid; Yield 22%, m.p. 135-136 °C;  $^1\text{H}$  NMR (400 MHz,  $\text{CDCl}_3$ )  $\delta = 12.40$  (d,  $J = 2.0$  Hz, 1H), 8.37 (d,  $J = 7.2$  Hz, 1H), 8.21 (s, 1H), 7.07 (d,  $J = 8.0$  Hz, 1H), 6.83 (d,  $J = 2.0$  Hz, 1H), 6.74 (d,  $J = 8.0$  Hz, 1H), 5.52 (s, 1H), 4.29 (q,  $J = 7.0$  Hz, 2H), 2.33 (s, 3H), 1.35 (t,  $J = 7.2$  Hz, 3H) ppm;  $^{13}\text{C}$  NMR (100 MHz,  $\text{CDCl}_3$ )  $\delta = 172.45, 167.60, 140.49, 134.16, 132.55, 131.86, 129.50, 127.04, 121.00, 109.70, 98.87, 60.85, 50.76, 21.24, 14.18$  ppm; ESI-HRMS: calcd. for  $\text{C}_{15}\text{H}_{15}\text{NO}_4 + \text{H}$  274.1079, found 274.1085.

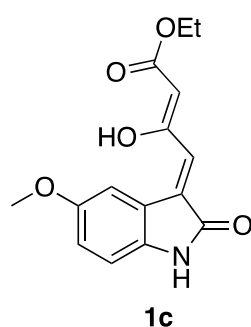

**Ethyl-(Z)-3-hydroxy-4-((E)-5-methoxy-2-oxoindolin-3-ylidene)but-2-enoate (1c)**

Red dark solid; Yield 16%, m.p. 136-137 °C;  $^1\text{H}$  NMR (400 MHz,  $\text{CDCl}_3$ )  $\delta = 12.42$  (d,  $J = 2.0$  Hz, 1H), 8.23 (d,  $J = 2.4$  Hz, 1H), 8.07 (d,  $J = 2.8$  Hz, 1H), 6.85 (d,  $J = 2.4$  Hz, 1H), 6.83 (d,  $J = 2.4$  Hz, 1H), 6.75 (d,  $J = 8.8$  Hz, 1H), 5.53 (s, 1H), 4.29 (q,  $J = 7.2$  Hz, 2H), 3.80 (s, 3H), 1.34 (t,  $J = 7.2$  Hz, 3H) ppm;  $^{13}\text{C}$  NMR (100 MHz,  $\text{CDCl}_3$ )  $\delta = 172.42, 167.41, 155.52, 136.62, 127.56, 121.76, 120.27, 117.29, 114.74, 110.32, 99.28, 60.92, 55.81, 50.71, 14.17$  ppm; ESI-HRMS: calcd. for  $\text{C}_{15}\text{H}_{15}\text{NO}_5 + \text{H}$  290.1028, found 290.1029.

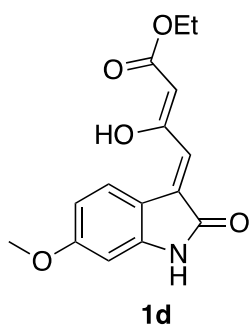

**Ethyl-(Z)-3-hydroxy-4-((E)-6-methoxy-2-oxoindolin-3-ylidene)but-2-enoate (1d)**

Orange solid; Yield 28%, m.p. 147-148 °C;  $^1\text{H}$  NMR (400 MHz,  $\text{CDCl}_3$ )  $\delta = 12.40$  (d,  $J = 2.0$  Hz, 1H), 8.33 (d,  $J = 8.8$  Hz, 1H), 8.04 (d,  $J = 8.8$  Hz, 1H), 6.71 (d,  $J =$

2.0 Hz, 1H), 6.52 – 6.53 (m, 1H), 6.40 (d,  $J = 2.4$  Hz, 1H), 5.48 (s, 1H), 4.27 (q,  $J = 7.0$  Hz, 2H), 3.84 (s, 3H), 1.34 (t,  $J = 7.2$  Hz, 3H) ppm;  $^{13}\text{C}$  NMR (100 MHz,  $\text{CDCl}_3$ )  $\delta = 172.56, 168.08, 162.60, 144.48, 131.75, 130.61, 124.19, 114.21, 107.64, 97.96, 96.78, 60.74, 55.57, 50.77, 14.20$  ppm; ESI-HRMS: calcd. for  $\text{C}_{15}\text{H}_{15}\text{NO}_5 + \text{H}$  290.1028, found 290.1030.

**Ethyl-(*Z*)-3-hydroxy-4-((*E*)-7-methyl-2-oxoindolin-3-ylidene)but-2-enoate (1e)**

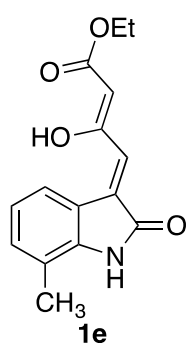

Orange solid; Yield 18%, m.p. 145-146 °C;  $^1\text{H}$  NMR (400 MHz,  $\text{CDCl}_3$ )  $\delta$ : 12.36 (q,  $J = 2.0$  Hz, 1H), 9.13 (s, 1H), 8.24 (d,  $J = 8.0$  Hz, 1H), 7.09 (d,  $J = 7.6$  Hz, 1H), 6.94 (t,  $J = 7.6$  Hz, 1H), 6.85 (d,  $J = 2.0$  Hz, 1H), 5.53 (s, 1H), 4.28 (q,  $J = 7.0$  Hz, 2H), 2.28 (s, 3H), 1.34 (t,  $J = 7.0$  Hz, 3H) ppm;  $^{13}\text{C}$  NMR (100 MHz,  $\text{CDCl}_3$ )  $\delta = 172.40, 170.32, 167.62, 141.65, 132.70, 127.28, 126.43, 122.43, 120.59, 119.13, 98.94, 60.82, 50.80, 16.29, 14.18$  ppm.

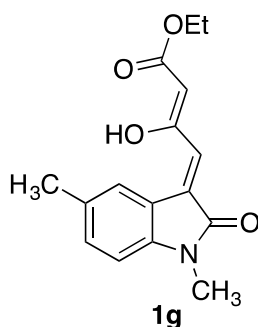

**Ethyl-(*Z*)-4-((*E*)-1,5-dimethyl-2-oxoindolin-3-ylidene)-3-hydroxybut-2-enoate (1g)**

Red solid; Yield 25%, m.p. 110-111 °C;  $^1\text{H}$  NMR (400 MHz,  $\text{CDCl}_3$ )  $\delta = 12.40$  (d,  $J = 2.0$  Hz, 1H), 8.23 (s, 1H), 7.12 (d,  $J = 8.0$  Hz, 1H), 6.87 (d,  $J = 2.0$  Hz, 1H), 6.67 (d,  $J = 8.0$  Hz, 1H), 5.51 (s, 1H), 4.28 (q,  $J = 7.2$  Hz, 2H), 3.21 (s, 3H), 2.34 (s, 3H), 1.34 (t,  $J = 7.0$  Hz, 3H) ppm;  $^{13}\text{C}$  NMR (100 MHz,  $\text{CDCl}_3$ )  $\delta = 172.49, 167.75, 143.28, 133.85, 132.33, 131.60, 129.31, 126.81, 120.46, 107.69, 98.67, 60.79, 50.79, 26.24, 21.21, 14.17$  ppm; ESI-HRMS: calcd. for  $\text{C}_{16}\text{H}_{17}\text{NO}_4 + \text{H}$  288.1236, found 288.1231.

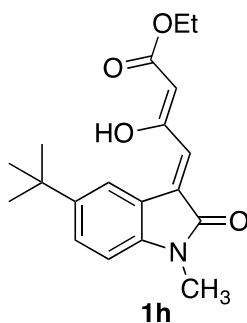

**Ethyl-(*Z*)-4-((*E*)-5-(*tert*-butyl)-1-methyl-2-oxoindolin-3-ylidene)-3-hydroxybut-2-enoate (1h)**

Reddish orange solid; Yield 30%, m.p. 140-141 °C;  $^1\text{H}$  NMR (400 MHz,  $\text{CDCl}_3$ )  $\delta$ : 12.45 (d,  $J = 2.0$  Hz, 1H), 8.54 (d,  $J = 1.6$  Hz, 1H), 7.36 (dd,  $J = 8.2, 1.8$  Hz, 1H),

6.88 (d,  $J = 2.0$  Hz, 1H), 6.72 (d,  $J = 8.4$  Hz, 1H), 5.54 (s, 1H), 4.29 (q,  $J = 7.2$  Hz, 2H), 3.23 (s, 3H), 1.35 (s, 3H), 1.33 (s, 9H) ppm;  $^{13}\text{C}$  NMR (100 MHz,  $\text{CDCl}_3$ )  $\delta = 172.56, 168.40, 167.84, 145.58, 143.16, 132.60, 128.04, 126.63, 126.09, 120.20, 107.41, 98.76, 60.81, 34.63, 31.45, 31.45, 31.45, 26.24, 14.17$  ppm .

**isopropyl (Z)-3-hydroxy-4-((E)-2-oxoindolin-3-ylidene)but-2-enoate (1j)**

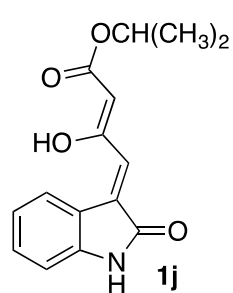

Yellow solid, m.p. 118-119 °C, 36%,  $^1\text{H}$  NMR (400 MHz,  $\text{CDCl}_3$ )  $\delta = 12.47$  (s, 1H), 8.62 (s, 1H), 8.42 (d,  $J = 7.2$  Hz, 1H), 7.27 (t,  $J = 7.6$  Hz, 1H), 7.30 (t,  $J = 8.0$  Hz, 1H), 6.86 (d,  $J = 7.6$  Hz, 1H), 6.85 (s, 1H), 5.51 (s, 1H), 5.10-5.20 (m, 1H), 1.33 (d,  $J = 6.0$  Hz, 6H) ppm;  $^{13}\text{C}$  NMR (100 MHz,  $\text{CDCl}_3$ )  $\delta = 172.00, 169.93, 167.34, 142.69, 138.59, 132.14, 131.32, 129.01, 127.57, 122.65, 110.00, 99.60, 68.57, 21.84$  ppm; ESI-HRMS: calcd. for  $\text{C}_{15}\text{H}_{15}\text{NO}_4 + \text{H}$  274.1079, found 274.1070.

**4. General procedure for the [3+2] annulation reaction:**

Allenoates (1.2 mmol) was added to a solution of methyleneoxindoles (1) (1 mmol) and catalyst DABCO (0.2 mmol) in  $\text{CH}_2\text{Cl}_2$  (2 mL). The stirring was maintained at room temperature until completion of the reaction (the reaction was monitored by TLC plate). The residue was purified by a flash column chromatography to yield 3 as a colorless solid.

**Benzyl-(E)-2-((E)-5-(2-ethoxy-2-oxoethylidene)-4-(2-oxoindolin-3-yl) dihydrofuran-2(3H)-ylidene)acetate (3a-E,E)**

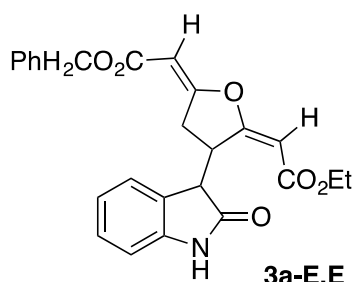

White solid; m.p. 177-178 °C; Yield 15%;  $^1\text{H}$  NMR (400 MHz,  $\text{CDCl}_3$ )  $\delta = 7.80$  (s, 1H), 7.40 (d,  $J = 7.6$  Hz, 1H), 7.27 – 7.36 (m, 5H), 7.24 (t,  $J = 7.6$  Hz, 1H), 7.08 (t,  $J = 7.6$  Hz, 1H), 6.84 (d,  $J = 8.0$  Hz, 1H), 5.83 (s, 1H), 5.65 (s, 1H), 5.10 (d,  $J = 12.4$  Hz, 1H), 4.99 (d,  $J = 12.4$  Hz, 1H), 4.33 (d,  $J = 10.4$  Hz, 1H), 4.28 (d,  $J = 2.8$  Hz, 1H), 4.19 (q,  $J = 7.2$  Hz, 2H), 2.99

(ddd,  $J = 19.6, 10.2, 2.4$  Hz, 1H), 2.82 (d,  $J = 19.6$  Hz, 1H), 1.29 (t,  $J = 7.2$  Hz, 3H) ppm;  $^{13}\text{C}$  NMR (100 MHz,  $\text{CDCl}_3$ )  $\delta = 176.73, 173.31, 171.27, 167.16, 167.08, 141.37, 136.08, 128.69, 128.48, 128.05, 128.01, 127.04, 124.31, 122.94, 109.84, 99.94, 96.01, 94.40, 65.72, 60.20, 47.89, 39.83, 30.68, 14.33$  ppm; ESI-HRMS: calcd. for  $\text{C}_{25}\text{H}_{23}\text{NO}_6 + \text{H}$  434.1604, found 434.1609.

**Benzyl-(*Z*)-2-((*E*)-5-(2-ethoxy-2-oxoethylidene)-4-(2-oxoindolin-3-yl)dihydrofuran-2(*3H*)-ylidene)acetate (**3a-Z,E**)**

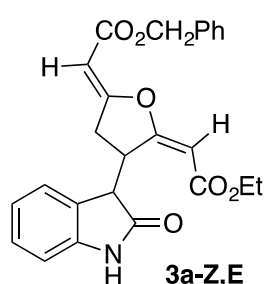

White solid; m.p. 162-163 °C; Yield 30%;  $^1\text{H}$  NMR (400 MHz,  $\text{CDCl}_3$ )  $\delta = 8.42$  (s, 1H), 7.21 – 7.43 (m, 5H), 7.18 (t,  $J = 7.8$  Hz, 1H), 7.07 (d,  $J = 7.2$  Hz, 1H), 6.92 (t,  $J = 7.4$  Hz, 1H), 6.83 (d,  $J = 8.0$  Hz, 1H), 5.84 (s, 1H), 5.36 (s, 1H), 5.05 (d,  $J = 12.4$  Hz, 1H), 4.97 (d,  $J = 12.4$  Hz, 1H), 4.53 (d,  $J = 10.0$  Hz, 1H), 4.34 (s, 1H), 4.19 – 4.31 (m, 2H), 3.04 (dd,  $J = 19.2, 9.8$  Hz, 1H), 2.73 (d,  $J = 19.2$  Hz, 1H), 1.33 (t,  $J = 7.0$  Hz, 3H) ppm;  $^{13}\text{C}$  NMR (100 MHz,  $\text{CDCl}_3$ )  $\delta = 176.88, 172.89, 170.84, 166.43, 166.31, 141.99, 136.09, 128.96, 128.48, 128.08, 127.96, 124.47, 124.40, 122.58, 109.96, 96.72, 94.30, 65.60, 60.54, 47.21, 40.17, 30.39, 14.30$  ppm; ESI-HRMS: calcd. for  $\text{C}_{25}\text{H}_{23}\text{NO}_6 + \text{H}$  434.1604, found 434.1588.

**Benzyl-(*Z*)-2-((*E*)-5-(2-ethoxy-2-oxoethylidene)-4-(2-oxoindolin-3-yl)dihydrofuran-2(*3H*)-ylidene)acetate (**3a-E,Z**)**

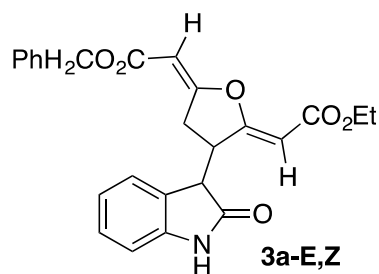

White solid; m.p. 162-163 °C; Yield 45%;  $^1\text{H}$  NMR (400 MHz,  $\text{CDCl}_3$ )  $\delta$ : 8.42 (s, 1H), 7.21-7.43 (m, 5H), 7.18 (t,  $J = 7.8$  Hz, 1H), 7.07 (d,  $J = 7.2$  Hz, 1H), 6.92 (t,  $J = 7.4$  Hz, 1H), 6.83 (d,  $J = 8.0$  Hz, 1H), 5.84 (s, 1H), 5.36 (s, 1H), 5.05 (d,  $J = 12.4$  Hz, 1H), 4.97 (d,  $J = 12.4$  Hz, 1H), 4.53 (d,  $J = 10.0$  Hz, 1H), 4.34 (s, 1H), 4.19 – 4.31 (m, 2H), 3.04 (dd,  $J = 19.2, 9.8$  Hz, 1H), 2.73 (d,  $J = 19.2$  Hz, 1H), 1.33 (t,  $J = 7.0$  Hz, 3H) ppm;  $^{13}\text{C}$  NMR (100 MHz,  $\text{CDCl}_3$ )  $\delta = 176.88, 172.89, 170.84, 166.43, 166.31, 141.99, 136.09, 128.96, 128.48, 128.08, 127.96,$

124.47, 124.40, 122.58, 109.96, 96.72, 94.30, 65.60, 60.54, 47.21, 40.17, 30.39, 14.30 ppm; ESI-HRMS: calcd. for C<sub>25</sub>H<sub>23</sub>NO<sub>6</sub>+H 434.1604, found 434.1588.

**Ethyl-(*E*)-2-((*E*)-5-(2-methoxy-2-oxoethylidene)-3-(2-oxoindolin-3-yl) dihydrofuran-2(*3H*)-ylidene)acetate (3b-*E,E*)**

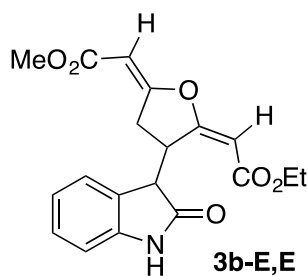

White solid; m.p. 205-206 °C; Yield 17%; <sup>1</sup>H NMR (400 MHz, CDCl<sub>3</sub>) δ: 7.48 (s, 1H), 7.41 (d, *J* = 7.6 Hz, 1H), 7.24 (t, *J* = 8.0 Hz, 1H), 7.09 (t, *J* = 7.4 Hz, 1H), 6.84 (d, *J* = 8.0 Hz, 1H), 5.82 (d, *J* = 1.2 Hz, 1H), 5.61 (t, *J* = 1.6 Hz, 1H), 4.34 (d, *J* = 10.4 Hz, 1H), 4.28 (d, *J* = 3.2 Hz, 1H), 4.19 (q, *J* = 7.2 Hz, 2H), 3.63 (s, 3H), 2.99 (ddd, *J* = 20.0, 10.2, 2.4 Hz, 1H), 2.83 (d, *J* = 19.6 Hz, 1H), 1.30 (t, *J* = 7.2 Hz, 4H) ppm; <sup>13</sup>C NMR (100 MHz, CDCl<sub>3</sub>) δ = 176.53, 173.37, 170.98, 167.77, 167.18, 141.31, 128.71, 127.08, 124.37, 122.98, 109.77, 95.95, 94.30, 60.20, 51.08, 47.91, 39.84, 30.58, 14.35 ppm; ESI-HRMS: calcd. for C<sub>19</sub>H<sub>19</sub>NO<sub>6</sub>+Na 380.1110, found 380.1104.

**Ethyl-(*E*)-2-((*Z*)-5-(2-methoxy-2-oxoethylidene)-3-(2-oxoindolin-3-yl) dihydrofuran-2(*3H*)-ylidene)acetate (3b-*Z,E*)**

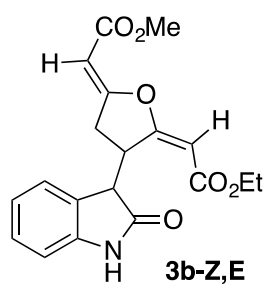

White solid; m.p. 207-208 °C; Yield 17%; <sup>1</sup>H NMR (400 MHz, CDCl<sub>3</sub>) δ = 7.20 (t, *J* = 7.6 Hz, 1H), 7.08 (d, *J* = 7.6 Hz, 1H), 6.93 (t, *J* = 7.6 Hz, 1H), 6.86 (d, *J* = 8.0 Hz, 1H), 5.84 (s, 1H), 5.33 (s, 1H), 4.53 (d, *J* = 10.0 Hz, 1H), 4.36 (d, *J* = 3.2 Hz, 1H), 4.33 – 4.18 (m, 2H), 3.56 (s, 3H), 3.05 (ddd, *J* = 19.6, 10.0, 2.4 Hz, 1H), 2.70 (d, *J* = 19.2 Hz, 1H), 1.33 (t, *J* = 7.0 Hz, 3H) ppm; <sup>13</sup>C NMR (100 MHz, CDCl<sub>3</sub>) δ = 176.79, 172.96, 170.61, 167.12, 166.33, 141.94, 128.97, 124.45, 124.42, 122.60, 109.96, 96.66, 94.12, 60.55, 51.09, 47.18, 40.06, 30.29, 14.30 ppm; ESI-HRMS: calcd. for C<sub>19</sub>H<sub>19</sub>NO<sub>6</sub>+Na 380.1110, found 380.1097.

**Ethyl-(*Z*)-2-((*E*)-5-(2-methoxy-2-oxoethylidene)-3-(2-oxoindolin-3-yl) dihydrofuran-2(*3H*)-ylidene)acetate (3b-*E,Z*)**

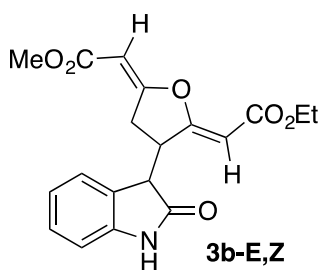

White solid; m.p. 140-141 °C; Yield 17%; <sup>1</sup>H NMR (400 MHz, CDCl<sub>3</sub>) δ = 8.81 (br, 1H), 7.24 (t, *J* = 7.6 Hz, 1H), 7.18 (d, *J* = 7.6 Hz, 1H), 6.97 (t, *J* = 7.6 Hz, 1H), 6.90 (d, *J* = 8.0 Hz, 1H), 5.63 (s, 1H), 5.37 (s, 1H), 4.23 (q, *J* = 6.8 Hz, 2H), 3.89-3.93 (m, 1H), 3.78 (d, *J* = 2.8 Hz, 1H), 3.59 (s, 3H), 3.25 (ddd, *J* = 18.9, 10.1, 1.3 Hz, 1H), 2.49 (ddd, *J* = 19.1, 6.3, 1.8 Hz, 1H), 1.31 (t, *J* = 7.2 Hz, 3H). <sup>13</sup>C NMR (100 MHz, CDCl<sub>3</sub>) δ = 171.09, 167.74, 167.41, 164.16, 141.70, 129.39, 124.85, 124.08, 123.12, 110.14, 95.40, 93.92, 60.26, 51.17, 48.02, 41.44, 28.57, 14.27 ppm; ESI-HRMS: calcd. for C<sub>19</sub>H<sub>19</sub>NO<sub>6</sub>+H 358.1291, found 358.1287.

**Diethyl-2,2'-(3-(2-oxoindolin-3-yl)dihydrofuran-2,5-diylidene)  
(2*E*,2'*E*)-diacetate (3c-E,E)**

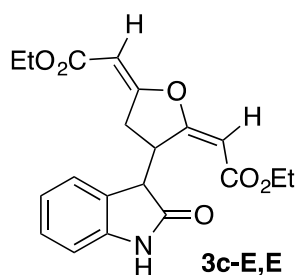

White solid; m.p. 165-166 °C; Yield 10%; <sup>1</sup>H NMR (400 MHz, CDCl<sub>3</sub>) δ = 7.64 (s, 1H), 7.40 (d, *J* = 7.2 Hz, 1H), 7.24 (t, *J* = 7.6 Hz, 1H), 7.08 (t, *J* = 7.6 Hz, 1H), 6.84 (d, *J* = 7.6 Hz, 1H), 5.82 (d, *J* = 1.2 Hz, 1H), 5.59 (t, *J* = 1.8 Hz, 1H), 4.33 (d, *J* = 9.6 Hz, 1H), 4.28 (d, *J* = 3.6 Hz, 1H), 4.19 (q, *J* = 7.0 Hz, 2H), 4.01-4.13 (m, 2H), 2.98 (ddd, *J* = 20.0, 10.4, 2.5 Hz, 1H), 2.79-2.85 (m, 1H), 1.30 (t, *J* = 7.2 Hz, 3H), 1.20 (t, *J* = 7.0 Hz, 3H) ppm; <sup>13</sup>C NMR (100 MHz, CDCl<sub>3</sub>) δ = 173.38, 170.75, 169.41, 167.36, 167.21, 141.30, 128.69, 127.09, 124.36, 122.96, 109.75, 95.86, 94.69, 60.18, 59.81, 47.87, 39.88, 30.52, 14.34, 14.24 ppm; ESI-HRMS: calcd. for C<sub>20</sub>H<sub>21</sub>NO<sub>6</sub>+H 372.1447, found 372.1451.

**Diethyl-2,2'-(3-(2-oxoindolin-3-yl)dihydrofuran-2,5-diylidene)  
(2*Z*,2'*E*)-diacetate (3c-Z,E)**



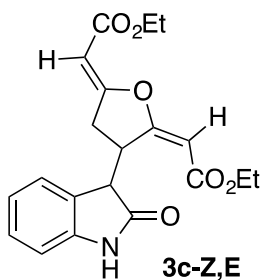

white solid; m.p. 182-183 °C; Yield 21%; <sup>1</sup>H NMR (400 MHz, CDCl<sub>3</sub>) δ: 8.30 (s, 1H), 7.20 (t, *J* = 7.6 Hz, 1H), 7.08 (d, *J* = 7.2 Hz, 1H), 6.93 (t, *J* = 7.4 Hz, 1H), 6.86 (d, *J* = 7.6 Hz, 1H), 5.83 (s, 1H), 5.31 (s, 1H), 4.52 (d, *J* = 10.0 Hz, 1H), 4.35 (s, 1H), 4.20 – 4.29 (m, 2H), 3.97 – 4.05 (m, 2H), 3.03 (dd, *J* = 19.2, 10.0 Hz, 1H), 2.70 (d, *J* = 19.6 Hz, 1H), 1.33 (t, *J* = 7.0 Hz, 3H), 1.16 (t, *J* = 7.0 Hz, 3H) ppm; <sup>13</sup>C NMR (100 MHz, CDCl<sub>3</sub>) δ = 176.91, 172.78, 170.36, 166.70, 166.35, 141.94, 128.95, 124.48, 124.45, 122.60, 109.93, 96.56, 94.57, 60.53, 59.80, 47.20, 40.12, 30.24, 14.31, 14.20 ppm; ESI-HRMS: calcd. for C<sub>20</sub>H<sub>21</sub>NO<sub>6</sub>+H 372.1447, found 372.1441.

**Diethyl-2,2'-(3-(2-oxoindolin-3-yl)dihydrofuran-2,5-diylidene)  
(2*Z*,2'*E*)-diacetate (3c-E,Z)**

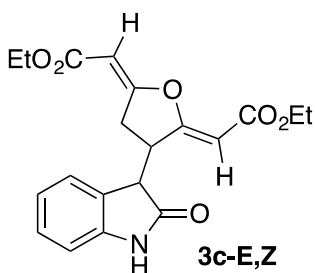

White solid; m.p. 109-110 °C; Yield 31%; <sup>1</sup>H NMR (400 MHz, CDCl<sub>3</sub>) δ = 8.32 (s, 1H), 7.24 (t, *J* = 7.6 Hz, 1H), 7.20 (d, *J* = 7.6 Hz, 1H), 6.80 (t, *J* = 7.6 Hz, 1H), 6.88 (d, *J* = 8.0 Hz, 1H), 5.61 (t, *J* = 2.0 Hz, 1H), 5.36 (d, *J* = 1.2 Hz, 1H), 4.23 (q, *J* = 7.2 Hz, 2H), 4.02-4.09 (m, 2H), 3.89-3.93 (m, 1H), 3.78 (d, *J* = 3.2 Hz, 1H), 3.25 (ddd, *J* = 18.9, 10.1, 1.9 Hz, 1H), 2.50 (ddd, *J* = 18.9, 6.4, 2.1 Hz, 1H), 1.32 (t, *J* = 7.2 Hz, 3H), 1.20 (t, *J* = 7.2 Hz, 3H) ppm; <sup>13</sup>C NMR (100 MHz, CDCl<sub>3</sub>) δ = 176.50, 170.88, 167.78, 167.01, 164.21, 141.81, 129.35, 124.83, 124.11, 123.07, 110.19, 95.79, 93.81, 60.25, 59.94, 48.05, 41.47, 28.50, 14.26, 14.20 ppm; ESI-HRMS: calcd. for C<sub>20</sub>H<sub>21</sub>NO<sub>6</sub>+H 372.1447, found 372.1440.

**Benzyl-(*E*)-2-((*E*)-5-(2-ethoxy-2-oxoethylidene)-4-(5-methyl-2-oxoindolin-3-yl)dihydrofuran-2(3*H*)-ylidene)acetate (3e-E,E)**

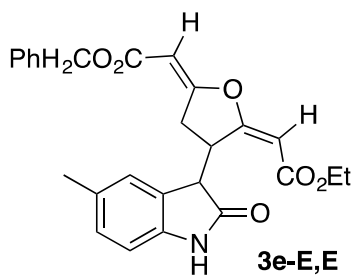

White solid; m.p. 168-169 °C; Yield 15%; <sup>1</sup>H NMR (400 MHz, CDCl<sub>3</sub>) δ: 7.59 (s, 1H), 7.39 – 7.27 (m, 5H), 7.21 (s, 1H), 7.03 (d, *J* = 7.6 Hz, 1H), 6.73 (d, *J* = 7.6 Hz, 1H), 5.82 (d, *J* = 1.6 Hz, 1H), 5.65 (t, *J* = 1.8 Hz, 1H), 5.11 (d, *J* = 12.4 Hz, 1H), 5.00 (d, *J* = 12.4 Hz, 1H), 4.31 (d, *J* = 9.6 Hz, 1H), 4.25 (d, *J* = 3.2 Hz, 1H), 4.20 (q, *J* = 7.1 Hz, 2H), 2.98 (ddd, *J* = 20.0, 10.4, 2.4 Hz, 1H), 2.88 – 2.78 (m, 1H), 2.34 (s, 3H), 1.30 (t, *J* = 7.2 Hz, 3H) ppm; <sup>13</sup>C NMR (100 MHz, CDCl<sub>3</sub>) δ = 176.75, 173.47, 171.34, 167.23, 167.08, 138.90, 136.11, 132.51, 128.97, 128.46, 128.02, 127.09, 125.00, 109.53, 95.90, 94.37, 65.70, 60.18, 47.89, 39.88, 30.66, 21.03, 14.33 ppm; ESI-HRMS: calcd. for C<sub>26</sub>H<sub>25</sub>NO<sub>6</sub>+H 448.1760, found 448.1780.

**Benzyl-(*Z*)-2-((*E*)-5-(2-ethoxy-2-oxoethylidene)-4-(5-methyl-2-oxoindolin-3-yl) dihydrofuran-2(3*H*)-ylidene)acetate (3e-*Z*,*E*)**

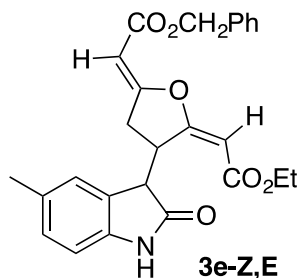

White solid; m.p. 178-179 °C; Yield 16%; <sup>1</sup>H NMR (400 MHz, CDCl<sub>3</sub>) δ = 8.24 (s, 1H), 7.18 – 7.41 (m, 5H), 6.97 (d, *J* = 8.0 Hz, 1H), 6.87 (s, 1H), 6.70 (d, *J* = 7.6 Hz, 1H), 5.84 (d, *J* = 1.2 Hz, 1H), 5.37 (s, 1H), 5.05 (d, *J* = 12.4 Hz, 1H), 4.98 (d, *J* = 12.4 Hz, 1H), 4.50 (d, *J* = 9.6 Hz, 1H), 4.29 (d, *J* = 4.4 Hz, 1H), 4.21 – 4.28 (m, 2H), 3.02 (ddd, *J* = 19.2, 10.0, 2.4 Hz, 1H), 2.71 (d, *J* = 19.2 Hz, 1H), 2.24 (s, 3H), 1.33 (t, *J* = 7.2 Hz, 3H) ppm; <sup>13</sup>C NMR (100 MHz, CDCl<sub>3</sub>) δ = 176.99, 173.03, 171.06, 166.42, 166.31, 139.53, 136.09, 132.02, 129.20, 128.48, 128.08, 127.97, 125.12, 124.44, 109.65, 96.66, 94.15, 65.54, 60.53, 47.26, 40.17, 30.42, 21.07, 14.31 ppm; ESI-HRMS: calcd. for C<sub>26</sub>H<sub>25</sub>NO<sub>6</sub>+H 448.1760, found 448.1752.

**Benzyl-(*E*)-2-((*Z*)-5-(2-ethoxy-2-oxoethylidene)-4-(5-methyl-2-oxoindolin-3-yl)dihydrofuran-2(*3H*)-ylidene)acetate (**3e-E,Z**)**

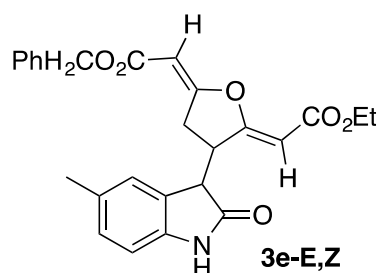

White solid; m.p. 187-188 °C; Yield 31%; <sup>1</sup>H NMR (400 MHz, CDCl<sub>3</sub>) δ = 8.36 (s, 1H), 7.28-7.36 (m, 5H), 7.02 (d, *J* = 8.0 Hz, 1H), 6.98 (s, 1H), 6.75 (d, *J* = 8.0 Hz, 1H), 5.69 (t, *J* = 1.8 Hz, 1H), 5.34 (d, *J* = 1.2 Hz, 1H), 5.08 (d, *J* = 12.4 Hz, 1H), 5.04 (d, *J* = 12.4 Hz, 1H), 4.20-4.28 (m, 2H), 3.86-3.90 (m, 1H), 3.73 (d, *J* = 2.8 Hz, 1H), 3.26 (ddd, *J* = 18.8, 10.1, 1.7 Hz, 1H), 2.53 (ddd, *J* = 18.9, 6.7, 2.0 Hz, 1H), 2.26 (s, 3H), 1.32 (t, *J* = 7.2 Hz, 3H) ppm; <sup>13</sup>C NMR (100 MHz, CDCl<sub>3</sub>) δ = 176.60, 171.52, 167.73, 166.77, 164.19, 139.35, 136.07, 132.61, 129.68, 128.47, 128.06, 127.94, 125.39, 124.17, 109.94, 95.43, 93.82, 65.72, 60.23, 47.92, 41.49, 28.69, 21.13, 14.26 ppm; ESI-HRMS: calcd. for C<sub>26</sub>H<sub>25</sub>NO<sub>6</sub>+H 448.1760, found 448.1780.

**Ethyl-(*E*)-2-((*E*)-5-(2-methoxy-2-oxoethylidene)-3-(5-methyl-2-oxoindolin-3-yl)dihydrofuran-2(*3H*)-ylidene)acetate (**3f-E,E**)**

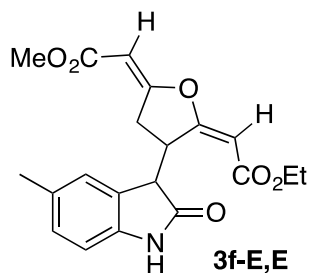

White solid; m.p. 184-185 °C; Yield 12%; <sup>1</sup>H NMR (400 MHz, CDCl<sub>3</sub>) δ = 7.62 (s, 1H), 7.22 (s, 1H), 7.03 (d, *J* = 7.6 Hz, 1H), 6.73 (d, *J* = 7.6 Hz, 1H), 5.82 (s, 1H), 5.60 (s, 1H), 4.32 (d, *J* = 10.4 Hz, 1H), 4.24 (d, *J* = 2.8 Hz, 1H), 4.20 (q, *J* = 7.2 Hz, 2H), 3.62 (s, 3H), 2.98 (ddd, *J* = 19.6, 10.4, 2.4 Hz, 1H), 2.81 (d, *J* = 19.6 Hz, 1H), 2.34 (s, 3H), 1.30 (t, *J* = 7.0 Hz, 3H) ppm; <sup>13</sup>C NMR (100 MHz, CDCl<sub>3</sub>) δ = 176.67, 173.50, 171.04, 167.74, 167.25, 138.91, 132.54, 128.99, 127.15, 125.04, 109.50, 95.86, 94.29, 60.17, 51.03, 39.92, 30.58, 21.04, 14.34 ppm; ESI-HRMS: calcd. for C<sub>21</sub>H<sub>23</sub>NO<sub>6</sub>+H 372.1447, found 372.1447.

**Ethyl-(*E*)-2-((*Z*)-3-(5-methyl-2-oxoindolin-3-yl)-5-(2-(methylperoxy)-2-oxoethylidene)dihydrofuran-2(*3H*)-ylidene)acetate (3f-*Z,E*)**

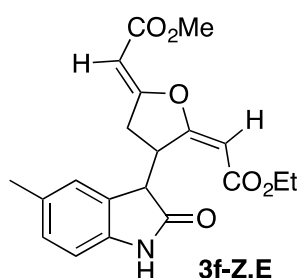

White solid; m.p. 168-169 °C; Yield 24%; <sup>1</sup>H NMR (400 MHz, CDCl<sub>3</sub>) δ: 7.98 (s, 1H), 6.99 (d, *J* = 7.6 Hz, 1H), 6.87 (s, 1H), 6.74 (d, *J* = 8.0 Hz, 1H), 5.84 (d, *J* = 1.2 Hz, 1H), 5.34 (s, 1H), 4.51 (d, *J* = 10.0 Hz, 1H), 4.31 (d, *J* = 3.2 Hz, 1H), 4.29 – 4.20 (m, 2H), 3.57 (s, 3H), 3.04 (ddd, *J* = 19.2, 10.0, 2.4 Hz, 1H), 2.68 (d, *J* = 19.2 Hz, 1H), 2.25 (s, 3H), 1.33 (t, *J* = 7.0 Hz, 3H) ppm; <sup>13</sup>C NMR (100 MHz, CDCl<sub>3</sub>) δ = 176.68, 173.03, 170.80, 167.13, 166.30, 139.44, 132.09, 129.21, 125.17, 124.53, 109.56, 96.68, 94.01, 60.52, 51.07, 47.21, 40.12, 30.35, 21.06, 14.32 ppm; ESI-HRMS: calcd. for C<sub>21</sub>H<sub>23</sub>NO<sub>6</sub>+H 372.1447, found 372.1441.

**Ethyl-(*Z*)-2-((*E*)-5-(2-methoxy-2-oxoethylidene)-3-(5-methyl-2-oxoindolin-3-yl)dihydrofuran-2(*3H*)-ylidene)acetate (3f-*E,Z*)**

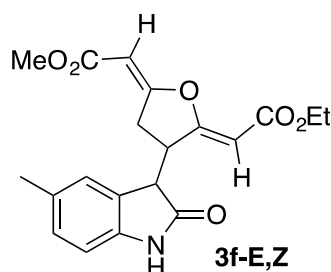

White solid; m.p. 165-166 °C; Yield 37%; <sup>1</sup>H NMR (400 MHz, CDCl<sub>3</sub>) δ = 8.54 (s, 1H), 7.03 (d, *J* = 7.6 Hz, 1H), 6.97 (s, 1H), 6.78 (d, *J* = 8.0 Hz, 1H), 5.65 (s, 1H), 5.35 (d, *J* = 1.2 Hz, 1H), 4.21-4.27 (m, 2H), 3.87-3.91 (m, 1H), 3.74 (d, *J* = 2.8 Hz, 1H), 3.26 (ddd, *J* = 18.8, 10.1, 1.6 Hz, 1H), 2.49 (ddd, *J* = 18.9, 6.9, 2.0 Hz, 1H), 2.26 (s, 3H), 1.32 (t, *J* = 7.2 Hz, 3H) ppm; <sup>13</sup>C NMR (100 MHz, CDCl<sub>3</sub>) δ = 176.68, 171.18, 167.80, 167.40, 164.19, 139.40, 132.62, 129.69, 125.37, 124.23, 109.98, 95.38, 93.76, 60.21, 51.15, 47.95, 41.47, 28.59, 21.12, 14.26 ppm; ESI-HRMS: calcd. for C<sub>21</sub>H<sub>23</sub>NO<sub>6</sub>+H 372.1447, found 372.1445.

**Diethyl-2,2'-(3-(5-methyl-2-oxoindolin-3-yl)dihydrofuran-2,5-diylidene)(2*E*,2'*E*)-diacetate (3g-*E,E*)**

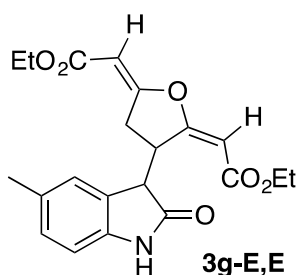

White solid; m.p. 176-177 °C; Yield 26%; <sup>1</sup>H NMR (400 MHz, CDCl<sub>3</sub>) δ = 7.57 (br, 1H), 7.22 (s, 1H), 7.03 (d, *J* = 8.0 Hz, 1H), 6.72 (d, *J* = 8.0 Hz, 1H), 5.82 (s, 1H), 5.59 (s, 1H), 4.31 (d, *J* = 9.6 Hz, 1H), 4.24 (d, *J* = 2.8 Hz, 1H), 4.20 (q, *J* = 7.1 Hz, 2H), 4.15 – 4.01 (m, 2H), 2.97 (ddd, *J* = 20.0, 10.4, 2.4 Hz, 1H), 2.81 (d, *J* = 20.0 Hz, 1H), 2.34 (s, 3H), 1.30 (t, *J* = 7.0 Hz, 3H), 1.20 (t, *J* = 7.0 Hz, 3H) ppm; <sup>13</sup>C NMR (100 MHz, CDCl<sub>3</sub>) δ = 176.72, 173.55, 170.81, 167.32, 167.27, 138.91, 132.51, 128.96, 127.15, 125.01, 109.49, 95.76, 94.67, 60.16, 59.77, 47.92, 39.94, 30.51, 21.03, 14.34, 14.23 ppm; ESI-HRMS: calcd. for C<sub>21</sub>H<sub>23</sub>NO<sub>6</sub>+H 408.1423, found 408.1412.

**Diethyl-2,2'-(3-(5-methyl-2-oxoindolin-3-yl)dihydrofuran-2,5-diylidene)(2Z,2'E)-diacetate (3g-Z,E)**

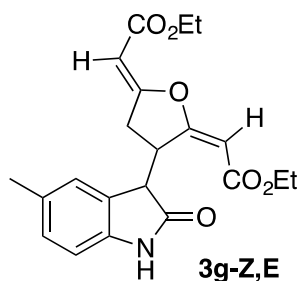

White solid; m.p. 198-199 °C; Yield 26%; <sup>1</sup>H NMR (400 MHz, CDCl<sub>3</sub>) δ = 8.35 (s, 1H), 6.99 (d, *J* = 8.0 Hz, 1H), 6.87 (s, 1H), 6.75 (d, *J* = 8.0 Hz, 1H), 5.84 (s, 1H), 5.32 (s, 1H), 4.50 (d, *J* = 9.6 Hz, 1H), 4.30 (d, *J* = 2.8 Hz, 1H), 4.28 – 4.20 (m, 2H), 4.07 – 3.97 (m, 2H), 3.02 (ddd, *J* = 19.6, 10.0, 2.4 Hz, 1H), 2.69 (d, *J* = 19.6 Hz, 1H), 2.25 (s, 3H), 1.33 (t, *J* = 7.2 Hz, 3H), 1.17 (t, *J* = 7.0 Hz, 3H) ppm; <sup>13</sup>C NMR (100MHz, CDCl<sub>3</sub>) δ = 176.97, 173.11, 170.56, 166.69, 166.34, 139.47, 132.02, 129.17, 125.14, 124.50, 109.62, 96.51, 94.45, 60.51, 59.80, 47.26, 40.12, 30.27, 21.07, 14.32, 14.20 ppm; ESI-HRMS: calcd. for C<sub>21</sub>H<sub>23</sub>NO<sub>6</sub>+H 408.1423, found 408.1404.

**Diethyl-2,2'-(3-(5-methyl-2-oxoindolin-3-yl)dihydrofuran-2,5-diylidene)(2Z,2'E)-diacetate (3g-E,Z)**

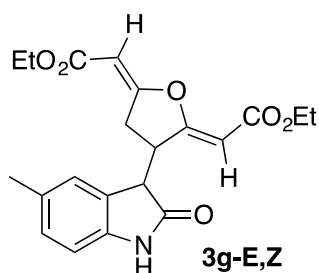

White solid; m.p. 142-143 °C; Yield 27%; <sup>1</sup>H NMR (400 MHz, CDCl<sub>3</sub>) δ = 8.34 (s, 1H), 7.04 (d, *J* = 7.6 Hz, 1H), 6.98 (s, 1H), 6.77 (d, *J* = 8.0 Hz, 1H), 5.64 (s, 1H), 5.34 (s, 1H), 4.21-4.27 (m, 2H), 4.04-4.10 (m, 2H), 3.87-3.91 (m, 1H), 3.74 (d, *J* = 2.8 Hz, 1H), 3.26 (dd, *J* = 18.8, 10.1 Hz, 1H), 2.49 (ddd, *J* = 18.8, 6.9, 1.9 Hz, 1H), 2.26 (s, 3H), 1.32 (t, *J* = 6.8 Hz, 3H), 1.20 (t, *J* = 7.2 Hz, 3H) ppm; <sup>13</sup>C NMR (100 MHz, CDCl<sub>3</sub>) δ = 176.86, 171.02, 167.91, 167.07, 164.32, 139.48, 132.62, 129.70, 125.41, 124.27, 110.05, 95.83, 93.66, 60.27, 60.00, 47.94, 41.54, 28.55, 21.18, 14.30, 14.24 ppm; ESI-HRMS: calcd. for C<sub>21</sub>H<sub>23</sub>NO<sub>6</sub>+H 408.1423, found 408.1413.

**Benzyl-(*E*)-2-((*E*)-5-(2-ethoxy-2-oxoethylidene)-4-(5-methoxy-2-oxoindolin-3-yl)dihydrofuran-2(*3H*)-ylidene)acetate (3h-E,E)**

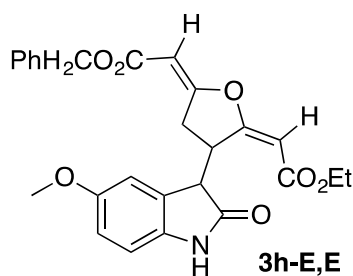

White solid; m.p. 152-153 °C; Yield 9%; <sup>1</sup>H NMR (400 MHz, CDCl<sub>3</sub>) δ = 7.52 (s, 1H), 7.28 – 7.37 (m, 5H), 7.00 (s, 1H), 6.78 (dd, *J* = 8.4, 2.4 Hz, 1H), 6.75 (d, *J* = 8.8 Hz, 1H), 5.83 (d, *J* = 0.8 Hz, 1H), 5.65 (s, 1H), 5.11 (d, *J* = 12.4 Hz, 1H), 5.01 (d, *J* = 12.4 Hz, 1H), 4.28-4.31 (m, 2H), 4.19 (q, *J* = 7.0 Hz, 2H), 3.81 (s, 3H), 2.99 (ddd, *J* = 19.6, 10.0, 2.4 Hz, 1H), 2.83 (d, *J* = 20.0 Hz, 1H), 1.30 (t, *J* = 7.2 Hz, 3H) ppm; <sup>13</sup>C NMR (100 MHz, CDCl<sub>3</sub>) δ = 176.49, 173.23, 171.25, 167.19, 167.07, 156.26, 136.17, 134.76, 128.48, 128.41, 128.05, 128.02, 113.67, 111.23, 110.23, 96.06, 94.45, 65.71, 60.18, 55.91, 48.26, 40.01, 30.68, 14.34 ppm; ESI-HRMS: calcd. for C<sub>26</sub>H<sub>25</sub>NO<sub>7</sub>+H 464.1709, found 464.1705.

**Ethyl-(*E*)-2-((*Z*)-3-(5-methyl-2-oxoindolin-3-yl)-5-(2-oxo-3-phenylpropylidene)dihydrofuran-2(*3H*)-ylidene)acetate (3h-Z,E)**

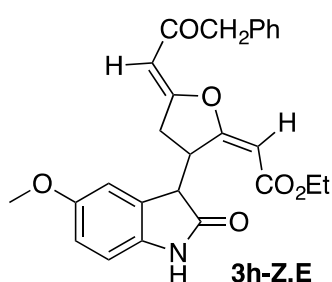

White solid; m.p. 150-151 °C; Yield 27%; <sup>1</sup>H NMR (400 MHz, CDCl<sub>3</sub>) δ = 8.45 (s, 1H), 7.21 – 7.39 (m, 5H), 6.74 (d, *J* = 8.8 Hz, 1H), 6.72 (d, *J* = 2.4 Hz, 1H), 6.68 (s, 1H), 5.84 (d, *J* = 1.2 Hz, 1H), 5.40 (s, 1H), 5.06 (d, *J* = 12.4 Hz, 1H), 4.99 (d, *J* = 12.4 Hz, 1H), 4.51 (d, *J* = 10.0 Hz, 1H), 4.32 (d, *J* = 3.2 Hz, 1H), 4.20 – 4.30 (m, 2H), 3.71 (s, 3H), 3.05 (ddd, *J* = 19.6, 10.0, 2.6 Hz, 1H), 2.73 (d, *J* = 19.2 Hz, 1H), 1.33 (t, *J* = 7.0 Hz, 3H) ppm; <sup>13</sup>C NMR (100 MHz, CDCl<sub>3</sub>) δ = 176.86, 172.86, 170.89, 166.41, 166.28, 155.75, 136.13, 135.50, 128.49, 128.09, 128.00, 125.77, 113.76, 111.66, 110.32, 96.76, 94.36, 65.62, 60.54, 55.87, 47.64, 40.15, 30.41, 14.30 ppm; ESI-HRMS: calcd. for C<sub>26</sub>H<sub>25</sub>NO<sub>7</sub>+H 464.1709, found 464.1710.

**Benzyl-(*E*)-2-((*Z*)-5-(2-ethoxy-2-oxoethylidene)-4-(5-methoxy-2-oxoindolin-3-yl)dihydrofuran-2(*3H*)-ylidene)acetate (**3h-E,Z**)**

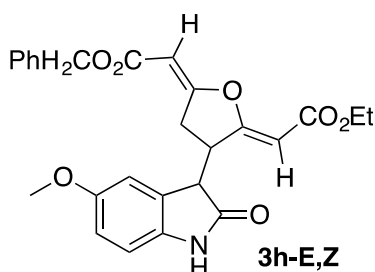

White solid; m.p. 121-122 °C; Yield 36%; <sup>1</sup>H NMR (400 MHz, CDCl<sub>3</sub>) δ = 7.30-7.38 (m, 5H), 6.82 (s, 1H), 6.75-6.79 (m, 2H), 5.70 (t, *J* = 2.0 Hz, 1H), 5.35 (d, *J* = 1.6 Hz, 1H), 5.10 (d, *J* = 12.4 Hz, 1H), 5.06 (d, *J* = 12.4 Hz, 1H), 4.24 (qd, *J* = 7.1, 1.5 Hz, 1H), 3.89-3.93 (m, 1H), 3.76 (d, *J* = 3.2 Hz, 1H), 3.74 (s, 3H), 3.28 (ddd, *J* = 18.9, 10.1, 1.8 Hz, 1H), 2.57 (ddd, *J* = 18.9, 6.5, 2.1 Hz, 1H), 1.33 (t, *J* = 7.2 Hz, 3H). <sup>13</sup>C NMR (100 MHz, CDCl<sub>3</sub>) δ = 171.48, 167.48, 166.83, 164.12, 155.97, 136.10, 128.53, 128.12, 128.00, 125.49, 113.87, 111.97, 110.70, 95.47, 94.03, 65.78, 60.30, 55.78, 48.38, 41.48, 28.79, 14.29 ppm; ESI-HRMS: calcd. for C<sub>26</sub>H<sub>25</sub>NO<sub>7</sub>+H 464.1709, found 464.1705.

**Diethyl-2,2'-(3-(5-methoxy-2-oxoindolin-3-yl)dihydrofuran-2,5-diylidene)(2*E*,2'*E*)-diacetate (**3i-E,E**)**

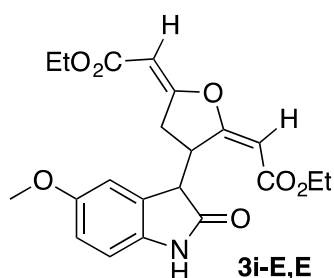

Yield 24%;  $^1\text{H NMR}$  (400 MHz,  $\text{CDCl}_3$ )  $\delta$  = 7.36 (s, 1H), 7.01 (s, 1H), 6.78 (dd,  $J$  = 8.4, 2.4 Hz, 1H), 6.75 (d,  $J$  = 8.4 Hz, 1H), 5.82 (d,  $J$  = 1.2 Hz, 1H), 5.59 (s, 1H), 4.27-4.32 (m, 2H), 4.19 (q,  $J$  = 7.2 Hz, 2H), 4.08 (m, 2H), 3.81 (s, 3H), 2.98 (ddd,  $J$  = 19.2, 10.0, 2.4 Hz, 1H), 2.83 (d,  $J$  = 20.0 Hz, 1H), 1.30 (t,  $J$  = 7.0 Hz, 3H), 1.21 (t,  $J$  = 7.0 Hz, 3H) ppm;  $^{13}\text{C NMR}$  (100 MHz,  $\text{CDCl}_3$ )  $\delta$  = 176.44, 173.32, 170.72, 167.34, 167.24, 156.21, 134.68, 128.41, 113.59, 111.21, 110.19, 95.88, 94.71, 60.17, 59.80, 55.90, 48.23, 40.01, 30.49, 14.35, 14.25 ppm; ESI-HRMS: calcd. for  $\text{C}_{21}\text{H}_{23}\text{NO}_7+\text{H}$  402.1553, found 402.1548.

**Diethyl-2,2'-(3-(5-methoxy-2-oxoindolin-3-yl)dihydrofuran-2,5-diylidene)(2Z,2'E)-diacetate (3i-Z,E)**

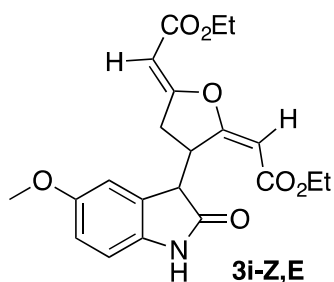

Yield 24%;  $^1\text{H NMR}$  (400 MHz,  $\text{CDCl}_3$ )  $\delta$  = 8.25 (s, 1H), 6.77 (d,  $J$  = 8.4 Hz, 1H), 6.74 (dd,  $J$  = 8.4, 2.2 Hz, 1H), 6.69 (s, 1H), 5.84 (d,  $J$  = 1.2 Hz, 1H), 5.35 (s, 1H), 4.51 (d,  $J$  = 10.0 Hz, 1H), 4.33 (d,  $J$  = 3.2 Hz, 1H), 4.20 – 4.30 (m, 2H), 3.98 – 4.08 (m, 2H), 3.73 (s, 3H), 3.05 (ddd,  $J$  = 19.6, 10.0, 2.6 Hz, 1H), 2.71 (d,  $J$  = 19.2 Hz, 1H), 1.33 (t,  $J$  = 7.2 Hz, 3H), 1.17 (t,  $J$  = 7.0 Hz, 3H) ppm;  $^{13}\text{C NMR}$  (100 MHz,  $\text{CDCl}_3$ )  $\delta$  = 176.88, 172.97, 170.42, 166.62, 166.33, 155.70, 135.46, 125.75, 113.73, 111.54, 110.32, 96.57, 94.62, 60.53, 59.82, 55.86, 47.63, 40.07, 30.25, 14.31, 14.21 ppm; ESI-HRMS: calcd. for  $\text{C}_{21}\text{H}_{23}\text{NO}_7+\text{H}$  402.1553, found 402.1554.

**Diethyl-2,2'-(3-(5-methoxy-2-oxoindolin-3-yl)dihydrofuran-2,5-diylidene)(2Z,2'E)-diacetate (3i-E,Z)**



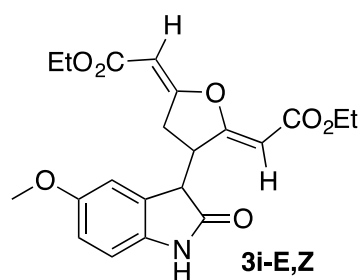

White solid; m.p. 99.0-100 °C; Yield 24%;  
<sup>1</sup>H NMR (400 MHz, CDCl<sub>3</sub>) δ = 8.16 (s, 1H), 6.81 (d, *J* = 2.4 Hz, 1H), 6.79 (d, *J* = 2.4 Hz, 1H), 6.76 (s, 1H), 5.63 (t, *J* = 2.0 Hz, 1H), 5.33 (d, *J* = 1.6 Hz, 1H), 4.22 (qd, *J* = 7.1, 1.8 Hz, 2H), 4.04 - 4.10 (m, 2H), 3.87-3.92 (m, 1H), 3.75 (d, *J* = 3.2 Hz, 1H), 3.73 (s, 3H), 3.26 (ddd, *J* = 18.9, 10.1, 1.9 Hz, 1H), 2.53 (ddd, *J* = 18.9, 6.6, 2.1 Hz, 1H), 1.31 (t, *J* = 6.8 Hz, 3H), 1.21 (t, *J* = 7.2 Hz, 3H); <sup>13</sup>C NMR (100 MHz, CDCl<sub>3</sub>) δ = 176.37, 170.86, 167.54, 167.02, 164.11, 155.91, 135.13, 125.48, 113.77, 111.94, 110.58, 95.79, 93.78, 60.24, 59.96, 55.74, 48.26, 41.45, 28.55, 14.26, 14.21 ppm; ESI-HRMS: calcd. for C<sub>21</sub>H<sub>23</sub>NO<sub>7</sub>+H 402.1553, found 402.1541.

**Benzyl-(*E*)-2-((*E*)-5-(2-ethoxy-2-oxoethylidene)-4-(6-methoxy-2-oxoindolin-3-yl)dihydrofuran-2(3*H*)-ylidene)acetate (3j-E,E)**

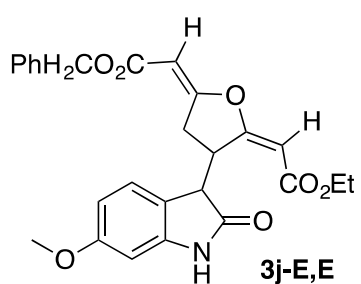

White solid; m.p. 178-179 °C; Yield 17%; <sup>1</sup>H NMR (400 MHz, CDCl<sub>3</sub>) δ = 7.38 (s, 1H), 7.27 - 7.36 (m, 6H), 6.59 (dd, *J* = 8.0, 2.2 Hz, 1H), 6.42 (d, *J* = 2.4 Hz, 1H), 5.81 (d, *J* = 1.2 Hz, 1H), 5.65 (t, *J* = 1.8 Hz, 1H), 5.12 (d, *J* = 12.4 Hz, 1H), 5.02 (d, *J* = 12.4 Hz, 1H), 4.25 - 4.32 (m, 1H), 4.14 - 4.23 (m, 3H), 3.81 (s, 3H), 2.97 (ddd, *J* = 20.0, 10.0, 2.4 Hz, 1H), 2.83 (dt, *J* = 20.0, 1.8 Hz, 1H), 1.30 (t, *J* = 7.2 Hz, 3H) ppm; <sup>13</sup>C NMR (100 MHz, CDCl<sub>3</sub>) δ = 177.17, 173.30, 171.35, 167.19, 167.13, 160.42, 142.46, 136.15, 128.51, 128.06, 125.06, 118.87, 107.62, 97.27, 96.03, 94.43, 65.75, 60.21, 55.56, 47.39, 40.12, 30.65, 14.36 ppm; ESI-HRMS: calcd. for C<sub>26</sub>H<sub>25</sub>NO<sub>7</sub>+H 464.1709, found 464.1703.

**Benzyl-(Z)-2-((E)-5-(2-ethoxy-2-oxoethylidene)-4-(6-methoxy-2-oxoindolin-3-yl)dihydrofuran-2(3H)-ylidene)acetate (3j-Z,E)**

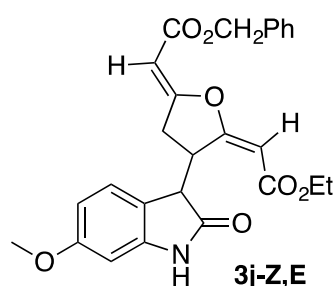

White solid; m.p. 198-199 °C; Yield 17%; <sup>1</sup>H NMR (400 MHz, CDCl<sub>3</sub>) δ = 8.29 (s, 1H), 7.22 – 7.38 (m, 5H), 6.95 (d, *J* = 8.2 Hz, 1H), 6.40 – 6.47 (m, 2H), 5.82 (d, *J* = 1.2 Hz, 1H), 5.38 (t, *J* = 2.0 Hz, 1H), 5.07 (d, *J* = 12.4 Hz, 1H), 4.99 (d, *J* = 12.4 Hz, 1H), 4.45– 4.54 (m, 1H), 4.17 – 4.33 (m, 3H), 3.76 (s, 3H), 3.03 (ddd, *J* = 19.6, 10.0, 2.4 Hz, 1H), 2.73 (dt, *J* = 19.2, 1.6 Hz, 1H), 1.33 (t, *J* = 7.0 Hz, 3H) ppm; <sup>13</sup>C NMR (100 MHz, CDCl<sub>3</sub>) δ = 173.06, 170.95, 166.52, 166.34, 160.56, 143.20, 128.51, 128.09, 127.94, 125.16, 116.02, 107.42, 97.24, 96.57, 94.22, 65.64, 60.52, 55.44, 46.75, 40.25, 30.36, 14.30 ppm; ESI-HRMS: calcd. for C<sub>26</sub>H<sub>25</sub>NO<sub>7</sub>+H 464.1709, found 464.1706.

**Benzyl-(E)-2-((Z)-5-(2-ethoxy-2-oxoethylidene)-4-(6-methoxy-2-oxoindolin-3-yl)dihydrofuran-2(3H)-ylidene)acetate (3j-E,Z)**

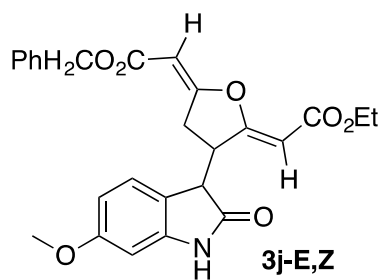

White solid; m.p. 155-156 °C; Yield 34%; <sup>1</sup>H NMR (400 MHz, CDCl<sub>3</sub>) δ = 8.31 (s, 1H), 7.27 – 7.38 (m, 5H), 7.07 (d, *J* = 8.3 Hz, 1H), 6.48 (dd, *J* = 8.3, 2.3 Hz, 1H), 6.45 (d, *J* = 2.2 Hz, 1H), 5.68 (t, *J* = 2.0 Hz, 1H), 5.36 (d, *J* = 1.5 Hz, 1H), 5.09 (d, *J* = 12.5 Hz, 1H), 5.04 (d, *J* = 12.5 Hz, 1H), 4.27 – 4.19 (m, 2H), 3.90 – 3.83 (m, 1H), 3.76 (s, 3H), 3.72 (d, *J* = 3.1 Hz, 1H), 3.23 (ddd, *J* = 18.9, 10.1, 1.9 Hz, 1H), 2.51 (ddd, *J* = 18.9, 6.3, 2.1 Hz, 1H), 1.32 (t, *J* = 7.1 Hz, 3H); <sup>13</sup>C NMR (100 MHz, CDCl<sub>3</sub>) δ = 177.33, 171.61, 167.91, 166.87, 164.25, 160.84, 143.15, 136.10, 128.53, 128.11, 127.95, 125.57, 115.75, 107.68, 97.69, 95.42, 93.94, 65.79, 60.31, 55.50, 47.73, 41.64, 28.60, 14.30 ppm; ESI-HRMS: calcd. for C<sub>26</sub>H<sub>25</sub>NO<sub>7</sub>+H 464.1709, found 464.1707.

**Benzyl-(*E*)-2-((*E*)-5-(2-ethoxy-2-oxoethylidene)-4-(7-methyl-2-oxoindolin-3-yl)dihydrofuran-2(3*H*)-ylidene)acetate (3k-*E,E*)**

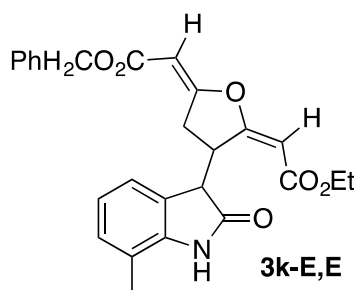

White solid; m.p. 140-141 °C; Yield 12%; <sup>1</sup>H NMR (400 MHz, CDCl<sub>3</sub>) δ = 7.83 (s, 1H), 7.26 – 7.36 (m, 5H), 7.23 (d, *J* = 7.2 Hz, 1H), 7.06 (d, *J* = 7.6 Hz, 1H), 7.00 (t, *J* = 7.6 Hz, 1H), 5.82 (d, *J* = 0.8 Hz, 1H), 5.64 (s, 1H), 5.10 (d, *J* = 12.4 Hz, 1H), 5.01 (d, *J* = 12.4 Hz, 1H), 4.28 – 4.36 (m, 2H), 4.19 (q, *J* = 7.2 Hz, 2H), 3.00 (ddd, *J* = 20.0, 10.2, 2.4 Hz, 1H), 2.80 (dt, *J* = 20.0, 1.8 Hz, 1H), 2.22 (s, 3H), 1.29 (t, *J* = 7.2 Hz, 3H) ppm; <sup>13</sup>C NMR (100 MHz, CDCl<sub>3</sub>) δ = 176.95, 173.45, 171.42, 167.14, 167.10, 140.12, 136.12, 130.04, 128.48, 128.05, 127.97, 126.62, 122.89, 121.67, 118.97, 95.96, 94.31, 65.72, 60.18, 48.35, 39.80, 30.76, 16.35, 14.33 ppm; ESI-HRMS: calcd. for C<sub>26</sub>H<sub>25</sub>NO<sub>6</sub>+H 448.1760, found 448.1766.

**Benzyl-(*Z*)-2-((*E*)-5-(2-ethoxy-2-oxoethylidene)-4-(7-methyl-2-oxoindolin-3-yl)dihydrofuran-2(3*H*)-ylidene)acetate (3k-*Z,E*)**

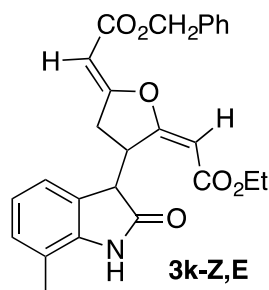

White solid; m.p. 161-162 °C; Yield 25%; <sup>1</sup>H NMR (400 MHz, CDCl<sub>3</sub>) δ = 9.10 (s, 1H), 7.21 – 7.36 (m, 5H), 7.01 (d, *J* = 7.6 Hz, 1H), 6.92 (d, *J* = 7.2 Hz, 1H), 6.84 (t, *J* = 7.6 Hz, 1H), 5.84 (d, *J* = 1.2 Hz, 1H), 5.39 (t, *J* = 1.8 Hz, 1H), 5.05 (d, *J* = 12.4 Hz, 1H), 4.99 (d, *J* = 12.4 Hz, 1H), 4.49 – 4.57 (m, 1H), 4.37 (d, *J* = 3.6 Hz, 1H), 4.20 – 4.30 (m, 2H), 3.07 (ddd, *J* = 19.2, 10.0, 2.6 Hz, 1H), 2.72 (dt, *J* = 19.6, 1.8 Hz, 1H), 2.25 (s, 3H), 1.34 (t, *J* = 7.0 Hz, 3H) ppm; <sup>13</sup>C NMR (100 MHz, CDCl<sub>3</sub>) δ = 177.65, 173.05, 171.01, 166.50, 166.34, 140.99, 136.07, 130.24, 128.46, 128.04, 127.86, 123.99, 122.48, 121.65, 119.44, 96.69, 94.19, 65.59, 60.52, 47.69, 39.99, 30.43, 16.53, 14.26 ppm; ESI-HRMS: calcd. for C<sub>26</sub>H<sub>25</sub>NO<sub>6</sub>+H 448.1760, found 448.1764.

**Benzyl-(*E*)-2-((*Z*)-5-(2-ethoxy-2-oxoethylidene)-4-(7-methyl-2-oxoindolin-3-yl)dihydrofuran-2(3*H*)-ylidene)acetate (3k-*E,Z*)**

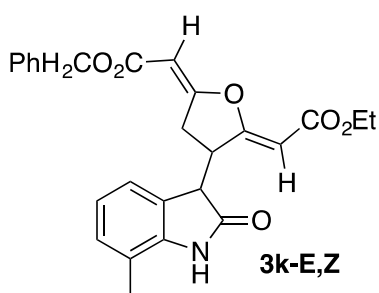

White solid; m.p. 77-78 °C; Yield 37%; <sup>1</sup>H NMR (400 MHz, CDCl<sub>3</sub>) δ = 8.69 (s, 1H), 7.28-7.35 (m, 5H), 7.06 (d, *J* = 7.6 Hz, 1H), 7.03 (d, *J* = 7.6 Hz, 1H), 6.90 (t, *J* = 7.6 Hz, 1H), 5.69 (t, *J* = 2.0 Hz, 1H), 5.36 (d, *J* = 1.5 Hz, 1H), 5.08 (d, *J* = 12.5 Hz, 1H), 5.04 (d, *J* = 12.5 Hz, 1H), 4.23 (q, *J* = 7.0 Hz, 2H), 3.96 – 3.88 (m, 1H), 3.79 (d, *J* = 3.1 Hz, 1H), 3.27 (ddd, *J* = 18.9, 10.1, 1.8 Hz, 1H), 2.25 (s, 3H), 1.31 (t, *J* = 7.1 Hz, 3H). <sup>13</sup>C NMR (100 MHz, CDCl<sub>3</sub>) δ = 177.04, 171.54, 167.69, 166.85, 164.16, 140.63, 136.07, 130.68, 128.48, 128.06, 127.91, 123.69, 123.03, 122.12, 119.60, 95.40, 93.93, 65.73, 60.24, 48.34, 41.39, 28.67, 16.47, 14.26 ppm; ESI-HRMS: calcd. for C<sub>26</sub>H<sub>25</sub>NO<sub>6</sub>+H 448.1760, found 448.1754.

**Benzyl-(*E*)-2-((*E*)-5-(2-ethoxy-2-oxoethylidene)-4-(1-methyl-2-oxoindolin-3-yl)dihydrofuran-2(*3H*)-ylidene)acetate (3l-E,E)**

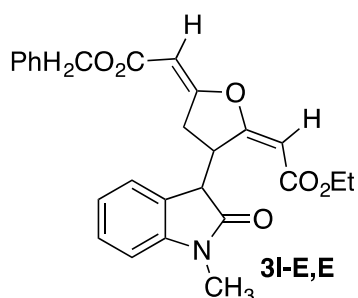

White solid; m.p. 131-132 °C; Yield 30%; <sup>1</sup>H NMR (400 MHz, CDCl<sub>3</sub>) δ = 7.41 (d, *J* = 7.6 Hz, 1H), 7.27 – 7.36 (m, 6H), 7.10 (td, *J* = 7.6, 0.8 Hz, 1H), 6.81 (d, *J* = 7.6 Hz, 1H), 5.83 (d, *J* = 1.2 Hz, 1H), 5.65 (t, *J* = 2.0 Hz, 1H), 5.10 (d, *J* = 12.4 Hz, 1H), 5.03 (d, *J* = 12.4 Hz, 1H), 4.30 – 4.38 (m, 1H), 4.26 (d, *J* = 3.6 Hz, 1H), 4.18 (q, *J* = 7.2 Hz, 2H), 3.10 (s, 3H), 2.94 (ddd, *J* = 19.6, 10.4, 2.4 Hz, 1H), 2.68 (dt, *J* = 19.6, 2.0 Hz, 1H), 1.29 (t, *J* = 7.2 Hz, 3H) ppm; <sup>13</sup>C NMR (100 MHz, CDCl<sub>3</sub>) δ = 174.86, 173.59, 171.36, 167.25, 167.08, 142.10, 136.18, 132.53, 128.89, 128.47, 128.03, 128.00, 126.41, 124.71, 108.02, 95.91, 94.34, 65.63, 60.13, 47.54, 39.89, 30.59, 26.07, 21.03, 14.33 ppm; ESI-HRMS: calcd. for C<sub>21</sub>H<sub>23</sub>NO<sub>6</sub>+H 448.1760, found 448.1773.

**Benzyl-(*Z*)-2-((*E*)-5-(2-ethoxy-2-oxoethylidene)-4-(1-methyl-2-oxoindolin-3-yl)dihydrofuran-2(*3H*)-ylidene)acetate (3l-Z,E)**

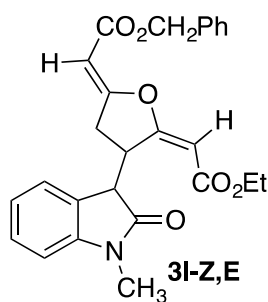

White solid; m.p. 99-100 °C; Yield 30%; <sup>1</sup>H NMR (400 MHz, CDCl<sub>3</sub>) δ = 7.33 – 7.37 (m, 1H), 7.27 (m, 5H), 7.09 (d, *J* = 7.6 Hz, 1H), 6.95 (t, *J* = 7.4 Hz, 1H), 6.75 (d, *J* = 7.6 Hz, 1H), 5.83 (d, *J* = 0.8 Hz, 1H), 5.36 (s, 1H), 5.04 (d, *J* = 12.4 Hz, 1H), 4.95 (d, *J* = 12.4 Hz, 1H), 4.53 (d, *J* = 10.0 Hz, 1H), 4.30 (d, *J* = 3.2 Hz, 1H), 4.18 – 4.28 (m, 2H), 3.19 (s, 3H), 2.98 (ddd, *J* = 19.2, 10.0, 2.6 Hz, 1H), 2.54 (d, *J* = 19.6 Hz, 1H), 1.33 (t, *J* = 7.2 Hz, 3H) ppm; <sup>13</sup>C NMR (101 MHz, CDCl<sub>3</sub>) δ = 174.80, 172.91, 170.91, 166.47, 166.23, 144.91, 136.05, 128.96, 128.49, 128.08, 127.93, 124.11, 123.82, 122.60, 108.23, 96.81, 94.21, 65.59, 60.55, 46.81, 40.16, 30.38, 26.35, 14.29 ppm; ESI-HRMS: calcd. for C<sub>21</sub>H<sub>23</sub>NO<sub>6</sub>+H 448.1760, found 448.1744.

**Benzyl-(*E*)-2-((*Z*)-5-(2-ethoxy-2-oxoethylidene)-4-(1-methyl-2-oxoindolin-3-yl)dihydrofuran-2(*3H*)-ylidene)acetate (3l-E,Z)**

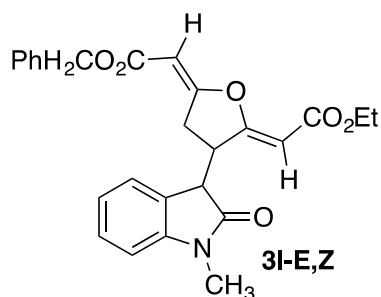

Yield 30%; <sup>1</sup>H NMR (400 MHz, CDCl<sub>3</sub>) δ = 7.27-7.37 (m, 6H), 7.20 (d, *J* = 7.6 Hz, 1H), 7.00 (t, *J* = 7.6 Hz, 1H), 6.82 (d, *J* = 7.6 Hz, 1H), 5.67 (t, *J* = 2.0 Hz, 1H), 5.36 (d, *J* = 1.6 Hz, 1H), 5.07 (d, *J* = 12.8 Hz, 1H), 5.02 (d, *J* = 12.8 Hz, 1H), 4.23 (q, *J* = 7.2 Hz, 2H), 3.91-3.95 (m, 1H), 3.73 (d, *J* = 2.8 Hz, 1H), 3.21 (s, 3H), 3.15-3.20 (m, 1H), 2.37 (ddd, *J* = 19.2, 6.4, 2.0 Hz, 1H), 1.32 (t, *J* = 7.2 Hz, 3H). <sup>13</sup>C NMR (100 MHz, CDCl<sub>3</sub>) δ = 174.47, 171.46, 167.84, 166.78, 164.13, 144.71, 136.01, 129.36, 128.48, 128.06, 127.92, 124.46, 123.43, 123.08, 108.55, 95.43, 93.90, 65.72, 60.23, 47.63, 41.44, 28.55, 26.46, 14.26 ppm; ESI-HRMS: calcd. for C<sub>21</sub>H<sub>23</sub>NO<sub>6</sub>+H 448.1760, found 448.1775.

**Diethyl-2,2'-(3-(1-methyl-2-oxoindolin-3-yl)dihydrofuran-2,5-diylidene)(2*E*,2'*E*)-diacetate (3m-E,E)**

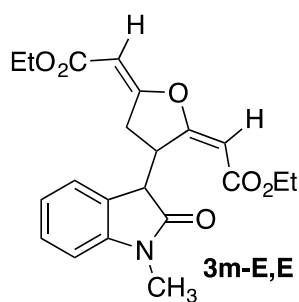

White solid; m.p. 130-131 °C; Yield 19%; <sup>1</sup>H NMR (400 MHz, CDCl<sub>3</sub>) δ: 7.42 (d, *J* = 7.2 Hz, 1H), 7.31 (t, *J* = 7.8 Hz, 1H), 7.10 (t, *J* = 7.6 Hz, 1H), 6.82 (d, *J* = 7.6 Hz, 1H), 5.82 (d, *J* = 1.2 Hz, 1H), 5.59 (t, *J* = 2.0 Hz, 1H), 4.33 (d, *J* = 9.6 Hz, 1H), 4.27 (d, *J* = 3.2 Hz, 1H), 4.18 (q, *J* = 7.2 Hz, 2H), 4.02 – 4.12 (m, 2H), 3.14 (s, 3H), 2.94 (ddd, *J* = 20.0, 10.4, 2.4 Hz, 1H), 2.68 (m, 1H), 1.29 (t, *J* = 7.2 Hz, 3H), 1.21 (t, *J* = 7.0 Hz, 3H) ppm; <sup>13</sup>C NMR (100 MHz, CDCl<sub>3</sub>) δ = 174.99, 173.52, 170.78, 167.34, 167.23, 144.49, 128.70, 126.46, 123.91, 122.93, 108.29, 95.87, 94.64, 60.13, 59.75, 47.58, 39.86, 30.47, 26.11, 14.35, 14.26 ppm; ESI-HRMS: calcd. for C<sub>21</sub>H<sub>23</sub>NO<sub>6</sub>+H 386.1604, found 386.1602.

**Diethyl-2,2'-(3-(1-methyl-2-oxoindolin-3-yl)dihydrofuran-2,5-diylidene)(2Z,2'E)-diacetate (3m-Z,E)**

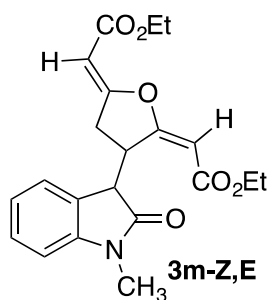

White solid; m.p. 140-141 °C; Yield 19%; <sup>1</sup>H NMR (400 MHz, CDCl<sub>3</sub>) δ = 7.26 (t, *J* = 7.8 Hz, 1H), 7.09 (d, *J* = 7.2 Hz, 1H), 6.95 (td, *J* = 7.6, 0.4 Hz, 1H), 6.79 (d, *J* = 8.0 Hz, 1H), 5.82 (d, *J* = 1.2 Hz, 1H), 5.30 (t, *J* = 1.8 Hz, 1H), 4.56 – 4.51 (m, 1H), 4.32 (d, *J* = 3.6 Hz, 1H), 4.19 – 4.29 (m, 2 H), 3.92 – 4.08 (m, 2H), 3.23 (s, 3H), 2.98 (ddd, *J* = 19.2, 10.0, 2.6 Hz, 1H), 2.48 – 2.57 (dt, *J* = 19.6, 1.8 Hz, 1H), 1.33 (t, *J* = 7.0 Hz, 2H), 1.15 (t, *J* = 7.2 Hz, 2H) ppm; <sup>13</sup>C NMR (100 MHz, CDCl<sub>3</sub>) δ = 174.85, 173.00, 170.41, 166.67, 166.26, 144.92, 128.93, 124.10, 123.87, 122.59, 108.20, 96.63, 94.47, 60.51, 59.72, 46.81, 40.10, 30.22, 26.38, 14.28, 14.18 ppm; ESI-HRMS: calcd. for C<sub>21</sub>H<sub>23</sub>NO<sub>6</sub>+H 386.1604, found 386.1629.

**Diethyl-2,2'-(3-(1-methyl-2-oxoindolin-3-yl)dihydrofuran-2,5-diylidene)(2Z,2'E)-diacetate (3m-E,Z)**

White solid; m.p. 142-143 °C; Yield 37%; <sup>1</sup>H NMR (400 MHz, CDCl<sub>3</sub>) δ = 7.30 (t, *J* = 8.0 Hz, 1H), 7.20 (d, *J* = 7.6 Hz, 1H), 7.00 (t, *J* = 7.2 Hz,

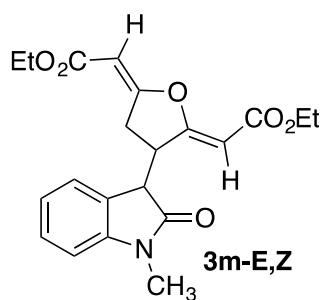

1H), 6.83 (t,  $J = 7.6$  Hz, 1H), 5.61 (t,  $J = 2.0$  Hz, 1H), 5.35 (d,  $J = 1.6$  Hz, 1H), 4.20-4.25 (m, 2H), 4.01-4.08 (m, 2H), 3.90-3.95 (m, 1H), 3.74 (d,  $J = 3.2$  Hz, 1H), 3.22 (s, 3H), 3.17 (ddd,  $J = 18.8, 12.0, 2.0$  Hz, 1H), 2.35 (ddd,  $J = 18.9, 6.6, 2.2$  Hz, 1H), 1.31 (t,  $J = 7.2$  Hz, 3H), 1.19 (t,  $J = 7.2$  Hz, 3H).

$^{13}\text{C}$  NMR (100 MHz,  $\text{CDCl}_3$ )  $\delta = 174.56, 170.97, 167.99, 167.03, 164.22, 144.78, 129.38, 124.51, 123.54, 123.11, 108.58, 95.77, 93.76, 60.24, 59.93, 47.66, 41.49, 28.43, 26.51, 14.30, 14.23$  ppm; ESI-HRMS: calcd. for  $\text{C}_{21}\text{H}_{23}\text{NO}_6 + \text{H}$  386.1604, found 386.1636.

**Ethyl-(E)-2-((E)-3-(1,5-dimethyl-2-oxoindolin-3-yl)-5-(2-methoxy-2-oxoethylidene)dihydrofuran-2(3H)-ylidene)acetate (3n-E,E)**

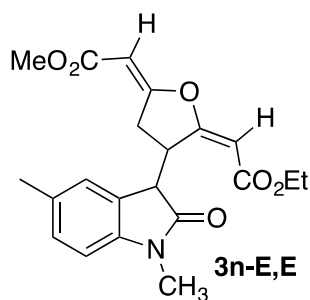

White solid; m.p. 159-160 °C; Yield 13%;  $^1\text{H}$  NMR (400 MHz,  $\text{CDCl}_3$ )  $\delta = 7.24$  (s, 1H), 7.03 – 7.17 (m, 1H), 6.71 (d,  $J = 7.6$  Hz, 1H), 5.82 (d,  $J = 2.0$  Hz, 1H), 5.60 (t,  $J = 2.0$  Hz, 1H), 4.26 – 4.39 (m, 1H), 4.23 (d,  $J = 3.2$  Hz, 1H), 4.19 (q,  $J = 7.0$  Hz, 2H), 3.62 (s, 3H), 3.11 (s, 3H), 2.94 (ddd,  $J = 20.0, 10.4, 2.6$  Hz, 1H), 2.67 (dt,  $J = 19.6, 2.0$  Hz,

1H), 2.35 (s, 3H), 1.29 (t,  $J = 7.0$  Hz, 3H) ppm;  $^{13}\text{C}$  NMR (100 MHz,  $\text{CDCl}_3$ )  $\delta = 174.89, 173.68, 171.10, 167.76, 167.26, 142.10, 132.54, 128.89, 126.41, 124.71, 108.02, 95.82, 94.16, 60.13, 51.02, 47.60, 39.82, 30.49, 26.00, 21.04, 14.33$  ppm; ESI-HRMS: calcd. for  $\text{C}_{21}\text{H}_{23}\text{NO}_6 + \text{Na}$  386.1604, found 408.1442.

**Ethyl-(E)-2-((Z)-3-(1,5-dimethyl-2-oxoindolin-3-yl)-5-(2-methoxy-2-oxoethylidene)dihydrofuran-2(3H)-ylidene)acetate (3n-Z,E)**

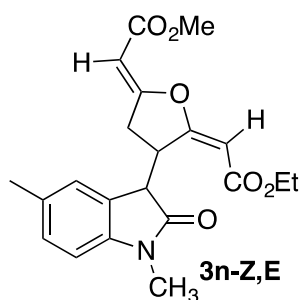

White solid; m.p. 151-152 °C; Yield 13%;  $^1\text{H}$  NMR (400 MHz,  $\text{CDCl}_3$ )  $\delta = 7.05$  (dt,  $J = 7.6, 0.8$  Hz, 1H), 6.89 (s, 1H), 6.68 (d,  $J = 8.0$  Hz, 1H), 5.83 (d,  $J = 1.2$  Hz, 1H), 5.33 (t,  $J = 2.0$  Hz, 1H), 4.52 (m, 1H), 4.17 – 4.33 (m, 3H), 3.56 (s, 3H), 3.21 (s, 3H), 2.99 (ddd,  $J = 19.2, 10.2, 2.4$  Hz, 1H), 2.51 (dt,

$J = 19.2, 2.0$  Hz, 1H), 2.26 (s, 3H), 1.33 (t,  $J = 7.2$  Hz, 3H) ppm;  $^{13}\text{C}$

NMR (100 MHz, CDCl<sub>3</sub>)  $\delta$  = 174.75, 173.09, 170.90, 167.13, 166.22, 142.55, 132.08, 129.09, 124.85, 123.88, 107.92, 96.72, 93.85, 60.51, 51.02, 46.86, 40.05, 30.30, 26.41, 21.05, 14.29 ppm; ESI-HRMS: calcd. for C<sub>21</sub>H<sub>23</sub>NO<sub>6</sub>+H 386.1604, found 386.1631.

**Ethyl-(Z)-2-((E)-3-(1,5-dimethyl-2-oxoindolin-3-yl)-5-(2-methoxy-2-oxoethylidene)dihydrofuran-2(3H)-ylidene)acetate (3n-E,Z)**

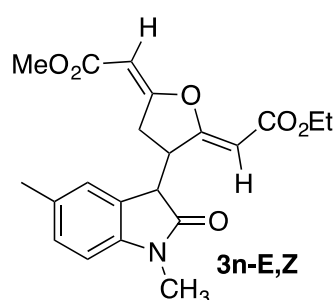

White solid; m.p. 124-125 °C; Yield 25%; <sup>1</sup>H NMR (400 MHz, CDCl<sub>3</sub>)  $\delta$  = 7.10 (d, *J* = 8.0 Hz, 1H), 6.99 (s, 1H), 6.72 (d, *J* = 8.0 Hz, 1H), 5.65 (t, *J* = 2.0 Hz, 1H), 5.34 (d, *J* = 1.6 Hz, 1H), 4.24 (qd, *J* = 7.1, 2.5 Hz, 2H), 3.89-3.95 (m, 1H), 3.71 (d, *J* = 2.8 Hz, 1H), 3.61 (s, 3H), 3.21 (s, 3H), 3.20 (ddd, *J* = 18.6, 10.2, 1.9 Hz, 3H), 2.36 (ddd, *J* = 18.9, 7.0, 2.2 Hz, 1H), 2.27 (s, 3H), 1.32 (t, *J* = 6.8 Hz, 3H). <sup>13</sup>C NMR (100 MHz, CDCl<sub>3</sub>)  $\delta$  = 174.50, 171.29, 168.05, 167.46, 164.23, 142.42, 132.70, 129.63, 125.19, 123.59, 108.35, 95.37, 93.68, 60.23, 51.19, 47.51, 41.49, 28.48, 26.53, 21.15, 14.30 ppm; ESI-HRMS: calcd. for C<sub>21</sub>H<sub>23</sub>NO<sub>6</sub>+H 386.1604, found 386.1628.

**Diethyl-2,2'-(3-(1,5-dimethyl-2-oxoindolin-3-yl)dihydrofuran-2,5-diylidene)(2E,2'E)-diacetate (3o-E,E)**

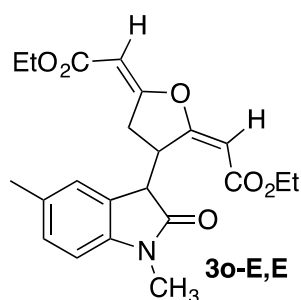

White solid; m.p. 140-141 °C; Yield 25%; <sup>1</sup>H NMR (400 MHz, CDCl<sub>3</sub>)  $\delta$ : 7.23 (s, 1H), 7.09 (d, *J* = 7.6 Hz, 1H), 6.70 (d, *J* = 8.0 Hz, 1H), 5.81 (d, *J* = 1.2 Hz, 1H), 5.58 (s, 1H), 4.31 (d, *J* = 9.6 Hz, 1H), 4.23 (d, *J* = 3.2 Hz, 1H), 4.18 (q, *J* = 7.2 Hz, 2H), 4.01 – 4.12 (m, 2H), 3.11 (s, 3H), 2.93 (ddd, *J* = 19.6, 10.2, 2.4 Hz, 1H), 2.67 (d, *J* = 20.0 Hz, 1H), 2.35 (s, 3H), 1.29 (t, *J* = 7.2 Hz, 3H), 1.21 (t, *J* = 7.2 Hz, 3H) ppm; <sup>13</sup>C NMR (100 MHz, CDCl<sub>3</sub>)  $\delta$  = 174.91, 173.69, 170.84, 167.33, 167.29, 142.08, 132.52, 128.87, 126.38, 124.63, 108.00, 95.73, 94.58, 60.11, 59.66, 47.56, 39.87, 30.43,



26.11, 21.03, 14.33, 14.25 ppm; ESI-HRMS: calcd. for C<sub>22</sub>H<sub>25</sub>NO<sub>6</sub>+H 400.1760, found 400.1769.

**Diethyl-2,2'-(3-(1,5-dimethyl-2-oxoindolin-3-yl)dihydrofuran-2,5-diylidene)(2Z,2'E)-diacetate (3o-Z,E)**

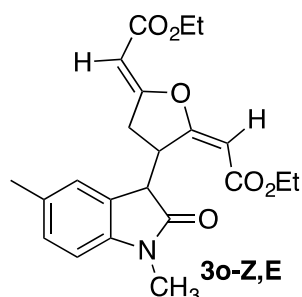

White solid; m.p. 151-152 °C; Yield 25%; <sup>1</sup>H NMR (400 MHz, CDCl<sub>3</sub>) δ = 7.05 (d, *J* = 8.0 Hz, 1H), 6.89 (s, 1H), 6.68 (d, *J* = 8.0 Hz, 1H), 5.83 (d, *J* = 1.6 Hz, 1H), 5.31 (t, *J* = 2.0 Hz, 1H), 4.45 – 4.57 (m, 1H), 4.16 – 4.33 (m, 3H), 3.91 – 4.10 (m, 2H), 3.21 (s, 3H), 2.97 (ddd, *J* = 19.6, 10.2, 2.6 Hz, 1H), 2.51 (dt, *J* = 19.6, 1.8 Hz, 1H), 2.26 (s, 3H), 1.33 (t, *J* = 7.0 Hz, 3H), 1.16 (t, *J* = 7.0 Hz, 3H) ppm; <sup>13</sup>C NMR (100 MHz, CDCl<sub>3</sub>) δ = 174.81, 173.13, 170.63, 166.69, 166.28, 142.56, 132.10, 129.09, 124.92, 123.91, 107.90, 96.63, 94.37, 60.52, 59.74, 46.88, 40.14, 30.28, 26.41, 21.06, 14.30, 14.21 ppm; ESI-HRMS: calcd. for C<sub>22</sub>H<sub>25</sub>NO<sub>6</sub>+H 400.1760, found 400.1774.

**Diethyl-2,2'-(3-(1,5-dimethyl-2-oxoindolin-3-yl)dihydrofuran-2,5-diylidene)(2Z,2'E)-diacetate (3o-E,Z)**

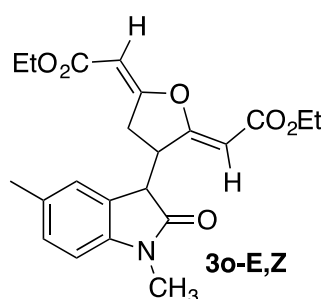

White solid; m.p. 123-124 °C; Yield 26%; <sup>1</sup>H NMR (400 MHz, CDCl<sub>3</sub>) δ = 7.10 (d, *J* = 6.8 Hz, 1H), 7.00 (s, 1H), 6.72 (d, *J* = 7.6 Hz, 1H), 5.64 (t, *J* = 2.0 Hz, 1H), 5.34 (d, *J* = 1.6 Hz, 1H), 4.24 (qd, *J* = 7.1, 2.5 Hz, 2H), 4.03-4.09 (m, 2H), 3.88-3.94 (m, 1H), 3.71 (d, *J* = 3.2 Hz, 1H), 3.21 (s, 3H), 3.20 (ddd, *J* = 18.6, 10.1, 1.9 Hz, 3H), 2.36 (ddd, *J* = 18.8, 7.0, 2.2 Hz, 1H), 2.28 (s, 3H), 1.32 (t, *J* = 7.2 Hz, 3H), 1.20 (t, *J* = 6.8 Hz, 3H). <sup>13</sup>C NMR (100 MHz, CDCl<sub>3</sub>) δ = 174.50, 171.02, 168.02, 167.03, 164.24, 142.38, 132.66, 129.58, 125.20, 124.80, 123.57, 108.29, 95.76, 93.55, 60.19, 59.92, 47.44, 41.52, 28.40, 26.49, 21.13, 14.27, 14.20 ppm; ESI-HRMS: calcd. for C<sub>22</sub>H<sub>25</sub>NO<sub>6</sub>+H 400.1760, found 400.1768.

**Benzyl-(E)-2-((E)-4-(5-(*tert*-butyl)-1-methyl-2-oxoindolin-3-yl)-5-(2-ethoxy-2-oxoethylidene)dihydrofuran-2(3*H*)-ylidene)acetate (3p-E,E)**

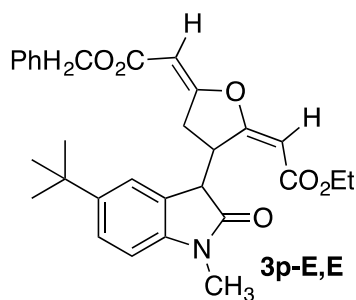

White solid; m.p. 109-110 °C; Yield 17%;  $^1\text{H}$  NMR (400 MHz,  $\text{CDCl}_3$ )  $\delta$  = 7.40 (s, 1H), 7.27 – 7.35 (m, 6H), 6.73 (d,  $J$  = 8.0 Hz, 1H), 5.83 (d,  $J$  = 1.6 Hz, 1H), 5.65 (t,  $J$  = 2.0 Hz, 1H), 5.10 (d,  $J$  = 12.4 Hz, 1H), 5.04 (d,  $J$  = 12.8 Hz, 1H), 4.30 – 4.38 (m, 1H), 4.25 (d,  $J$  = 3.6 Hz, 1H), 4.19 (q,  $J$  = 7.2 Hz, 2H), 3.08 (s, 3H), 2.94 (ddd,  $J$  = 20.0, 10.4, 2.4 Hz, 1H), 2.69 (dt,  $J$  = 19.6, 2.0 Hz, 1H), 1.34 (s, 9H), 1.30 (t,  $J$  = 7.2 Hz, 3H) ppm;  $^{13}\text{C}$  NMR (100 MHz,  $\text{CDCl}_3$ )  $\delta$  = 175.04, 173.39, 171.39, 167.20, 167.17, 146.23, 142.07, 136.15, 128.48, 128.05, 128.00, 126.03, 125.36, 120.95, 107.77, 96.11, 94.29, 65.67, 60.14, 47.60, 39.93, 34.61, 31.61, 30.64, 26.08, 14.34 ppm; ESI-HRMS: calcd. for  $\text{C}_{30}\text{H}_{33}\text{NO}_6 + \text{H}$  504.2386, found 504.2382.

**Benzyl-(Z)-2-((E)-4-(5-(tert-butyl)-1-methyl-2-oxoindolin-3-yl)-5-(2-ethoxy-2-oxoethylidene)dihydrofuran-2(3H)-ylidene)acetate (3p-Z,E)**

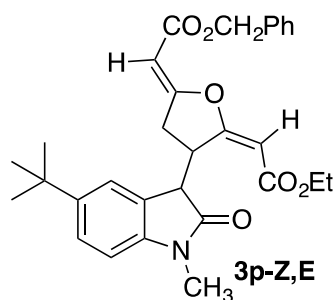

Yield 36%;  $^1\text{H}$  NMR (400 MHz,  $\text{CDCl}_3$ )  $\delta$  = 7.28 – 7.38 (m, 5H), 7.24 (d,  $J$  = 1.6 Hz, 1H), 7.11 (s, 1H), 6.65 (d,  $J$  = 8.0 Hz, 1H), 5.85 (s, 1H), 5.31 (s, 1H), 4.99 (s, 2H), 4.53 (d,  $J$  = 9.2 Hz, 1H), 4.22 – 4.33 (m, 2H), 4.20 (d,  $J$  = 3.2 Hz, 1H), 3.17 (s, 3H), 2.90 (ddd,  $J$  = 19.2, 9.8, 2.4 Hz, 1H), 2.54 (d,  $J$  = 19.2 Hz, 1H), 1.24 (s, 12H) ppm;  $^{13}\text{C}$  NMR (100 MHz,  $\text{CDCl}_3$ )  $\delta$  = 173.91, 172.22, 169.96, 165.32, 165.23, 144.59, 141.40, 135.13, 127.45, 127.03, 126.86, 124.27, 122.41, 120.49, 106.57, 95.72, 93.18, 64.46, 59.58, 46.25, 39.36, 33.35, 30.35, 29.36, 28.68, 25.35, 13.30 ppm; ESI-HRMS: calcd. for  $\text{C}_{30}\text{H}_{33}\text{NO}_6 + \text{H}$  504.2386, found 504.2384.

**Benzyl-(E)-2-((Z)-4-(5-(tert-butyl)-1-methyl-2-oxoindolin-3-yl)-5-(2-ethoxy-2-oxoethylidene)dihydrofuran-2(3H)-ylidene)acetate (3p-E,Z)**

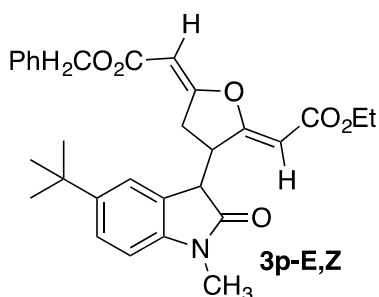

Yield 36%;  $^1\text{H}$  NMR (400 MHz,  $\text{CDCl}_3$ )  $\delta$  = 7.23-7.34 (m, 7H), 6.71 (d,  $J$  = 8.0 Hz, 1H),

5.58 (t,  $J = 2.0$  Hz, 1H), 5.38 (d,  $J = 1.2$  Hz, 1H), 5.03 (s, 2H), 4.24 (qd,  $J = 7.1, 1.6$  Hz, 1H), 3.88-3.93 (m, 1H), 3.68 (d,  $J = 3.2$  Hz, 1H), 3.18 (s, 3H), 3.07 (ddd,  $J = 19.0, 10.1, 2.2$  Hz, 1H), 2.43 (ddd,  $J = 19.0, 4.9, 1.9$  Hz, 1H), 1.32 (t,  $J = 7.2$  Hz, 3H), 1.24 (s, 9H) ppm;  $^{13}\text{C}$  NMR (100 MHz,  $\text{CDCl}_3$ )  $\delta = 174.57, 171.66, 167.92, 166.67, 164.14, 146.23, 142.23, 136.12, 128.47, 128.05, 127.88, 125.75, 123.07, 121.68, 107.92, 95.11, 94.30, 65.61, 60.21, 48.67, 41.60, 34.43, 31.32, 28.86, 26.44, 14.30$  ppm; ESI-HRMS: calcd. for  $\text{C}_{30}\text{H}_{33}\text{NO}_6 + \text{H}$  504.2386, found 504.2388.

**benzyl (E)-2-((E)-5-(2-isopropoxy-2-oxoethylidene)-4-(2-oxoindolin-3-yl)dihydrofuran-2(3H)-ylidene)acetate (3q-E,E)**

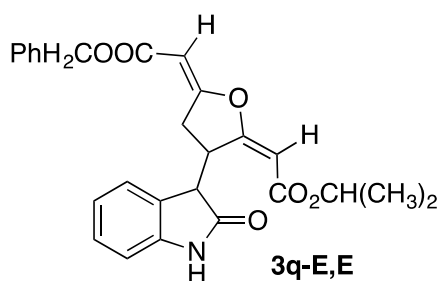

$^1\text{H}$  NMR (400 MHz,  $\text{CDCl}_3$ )  $\delta = 7.51$  (s, 1H), 7.41 (d,  $J = 7.6$  Hz, 1H), 7.23 – 7.36 (m, 6H), 7.08 (td,  $J = 7.6, 1.2$  Hz, 1H), 6.84 (d,  $J = 8.0$  Hz, 1H), 5.79 (d,  $J = 1.2$  Hz, 1H), 5.65 (t,  $J = 1.9$  Hz, 1H), 4.99 – 5.14 (m, 3H), 4.31 – 4.36 (m, 1H), 4.30 (d,  $J = 3.2$  Hz, 1H), 2.98 (qd,  $J = 19.8, 10.2, 2.6$  Hz, 1H), 2.82 (dt,  $J = 19.6, 1.8$  Hz, 1H), 1.26 (d,  $J = 6.0$  Hz, 6H) ppm;  $^{13}\text{C}$  NMR (100 MHz,  $\text{CDCl}_3$ )  $\delta = 176.53, 172.96, 171.31, 167.14, 166.64, 141.29, 136.11, 128.69, 128.49, 128.06, 128.02, 127.08, 124.39, 122.96, 109.74, 96.56, 94.32, 76.68, 67.47, 65.71, 47.88, 39.81, 30.71, 22.01, 21.99$  ppm. ESI-HRMS: calcd. for  $\text{C}_{26}\text{H}_{25}\text{NO}_6 + \text{H}$  448.1760, found 448.1751.

**benzyl (Z)-2-((E)-5-(2-isopropoxy-2-oxoethylidene)-4-(2-oxoindolin-3-yl)dihydrofuran-2(3H)-ylidene)acetate (3q-Z,E)**

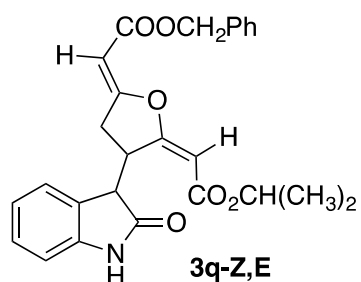

$^1\text{H}$  NMR (400 MHz,  $\text{CDCl}_3$ )  $\delta: 8.47$  (s, 1H), 7.18 – 7.38 (m, 6H), 7.10 (d,  $J = 7.2$  Hz, 1H), 6.94 (t,  $J = 8.0$  Hz, 1H), 6.85 (d,  $J = 7.6$  Hz, 1H), 5.83 (s, 1H), 5.38 (s, 1H), 5.16 (m, 1H), 4.96 – 5.10 (q,  $J = 12.4$  Hz, 2H), 4.54 (d,  $J = 10.0$  Hz, 1H), 4.35 (s, 1H), 3.05 (dd,  $J = 19.6, 10.0$  Hz, 1H), 2.74 (d,  $J = 19.6$  Hz, 1H), 1.33 (d,  $J = 6.2$  Hz, 6H) ppm;  $^{13}\text{C}$  NMR (100 MHz,  $\text{CDCl}_3$ )  $\delta: 195.94, 176.91, 172.56, 170.88, 166.46, 165.79, 141.99,$

136.08, 128.95, 128.47, 128.06, 127.94, 124.49, 124.40, 122.57, 109.96, 97.27, 94.20, 68.00, 65.58, 47.32, 40.15, 30.41, 21.96, 21.96 ppm. ESI-HRMS: calcd. for C<sub>26</sub>H<sub>25</sub>NO<sub>6</sub>+H 448.1760, found 448.1758.

**benzyl (E)-2-((Z)-5-(2-isopropoxy-2-oxoethylidene)-4-(2-oxoindolin-3-yl)dihydrofuran-2(3H)-ylidene)acetate (3q-E,Z)**

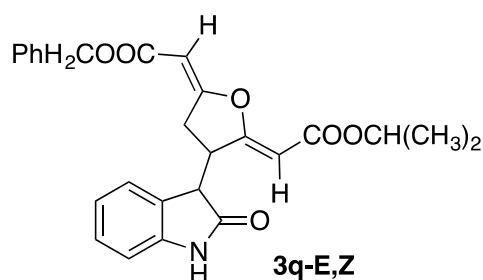

<sup>1</sup>H NMR (400 MHz, CDCl<sub>3</sub>) δ = 8.44 (s, 1H), 7.17-7.36 (m, 7H), 6.98 (t, *J* = 7.6 Hz, 1H), 6.86 (d, *J* = 7.6 Hz, 1H), 5.66 (t, *J* = 2.0 Hz, 1H), 5.35 (d, *J* = 1.6 Hz, 1H), 5.16-5.17 (m, 1H), 5.00-5.10 (m, 2H), 3.87-3.92 (m, 1H), 3.76 (d, *J* = 3.2 Hz, 1H), 3.23 (ddd, *J* = 18.9, 10.1, 2.1 Hz, 1H), 2.50 (ddd, *J* = 18.9, 6.3, 2.2 Hz, 1H), 1.30 (dd, *J* = 6.0, 3.6 Hz, 6H) ppm; <sup>13</sup>C NMR (100 MHz, CDCl<sub>3</sub>) δ = 176.50, 171.46, 167.45, 166.77, 163.68, 141.80, 136.05, 129.34, 128.54, 128.47, 128.06, 127.97, 127.92, 124.81, 124.05, 123.05, 110.20, 95.36, 94.47, 67.63, 65.71, 48.11, 41.43, 28.65, 21.93 ppm; ESI-HRMS: calcd. for C<sub>26</sub>H<sub>25</sub>NO<sub>6</sub>+H 448.1760, found 448.1755.

J. Kun, Z.-J. Jia, X. Yin, L. Wu, Y.-C. Chen, *Org. Lett.* **2010**, *12*, 2766-2769.

**5. Representative spectra of 3.**

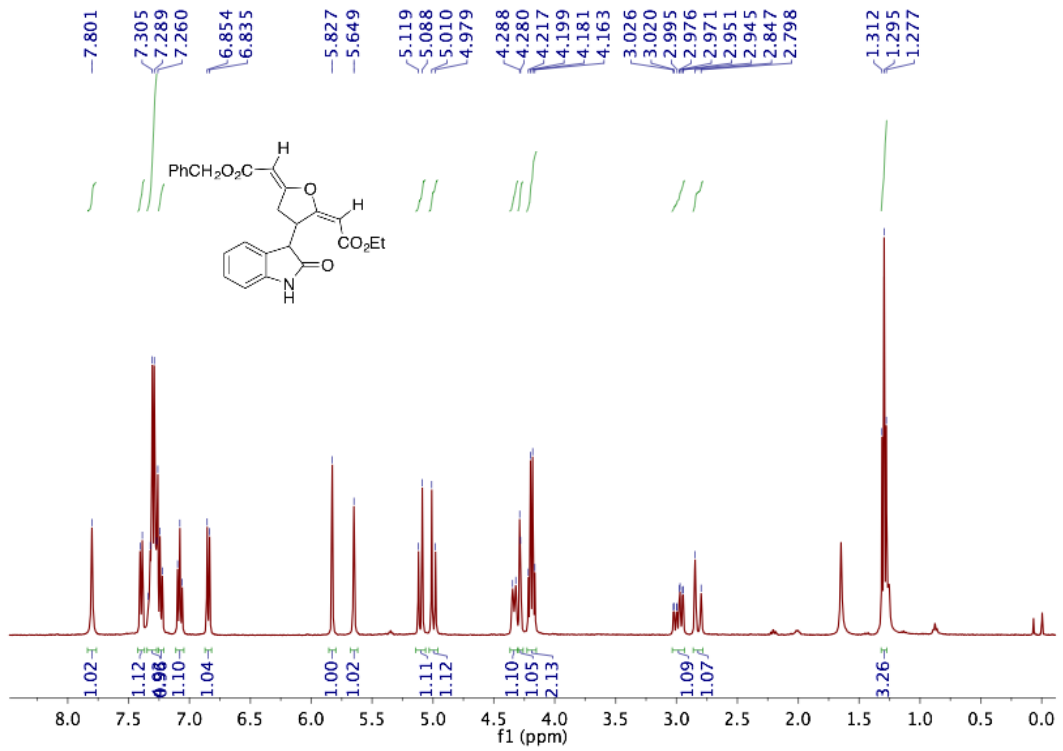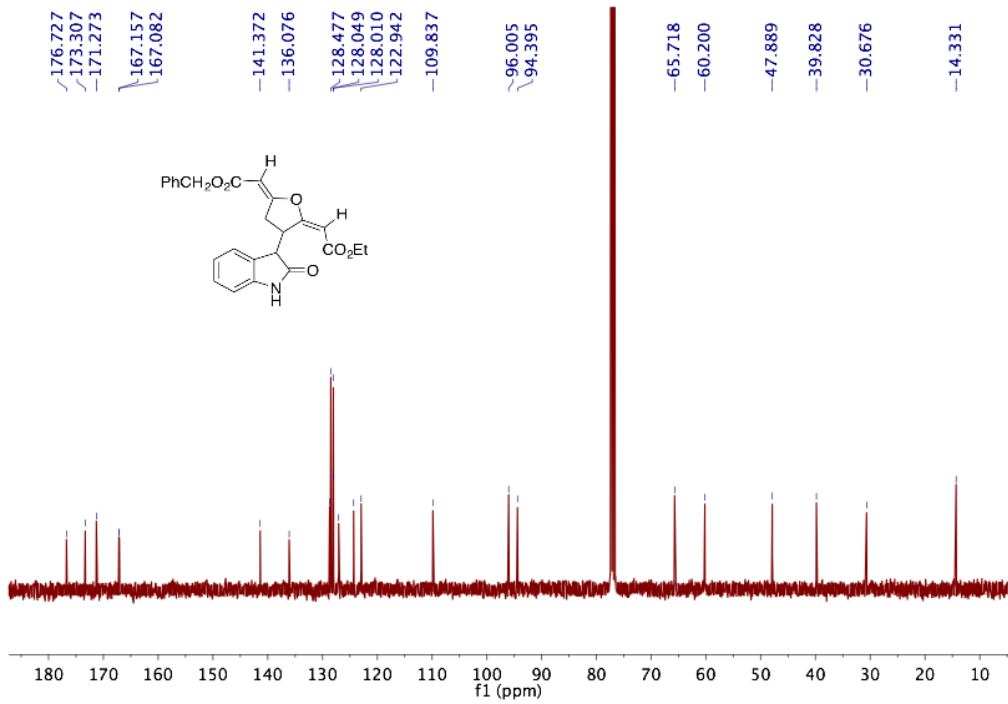

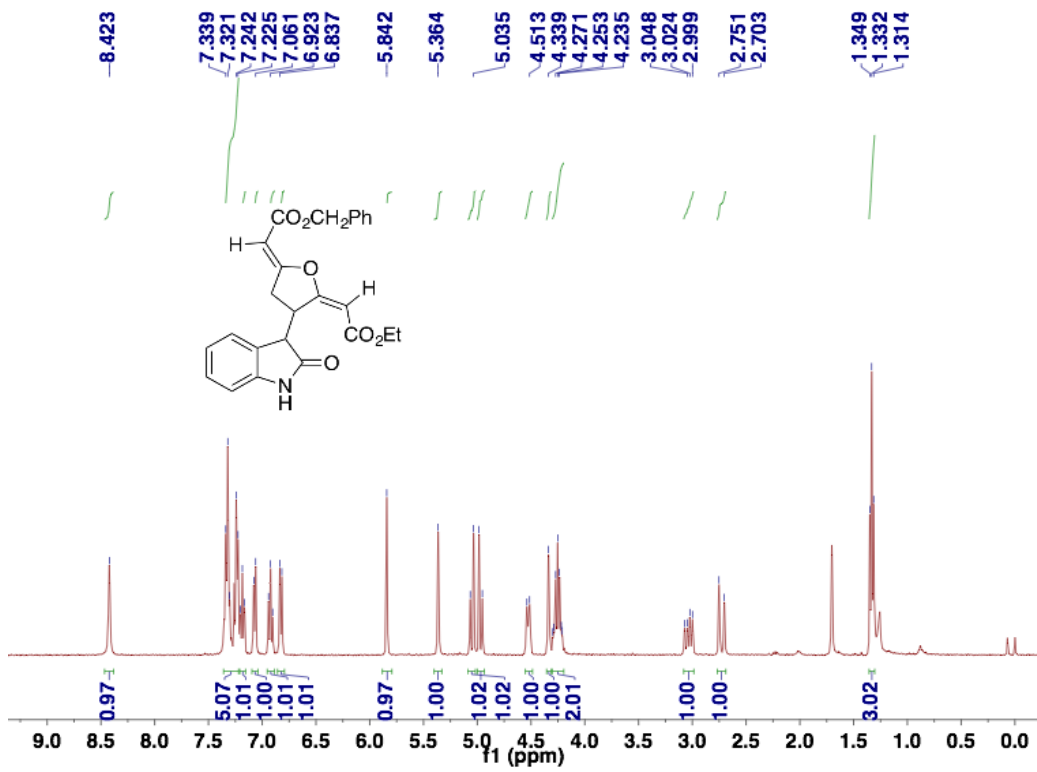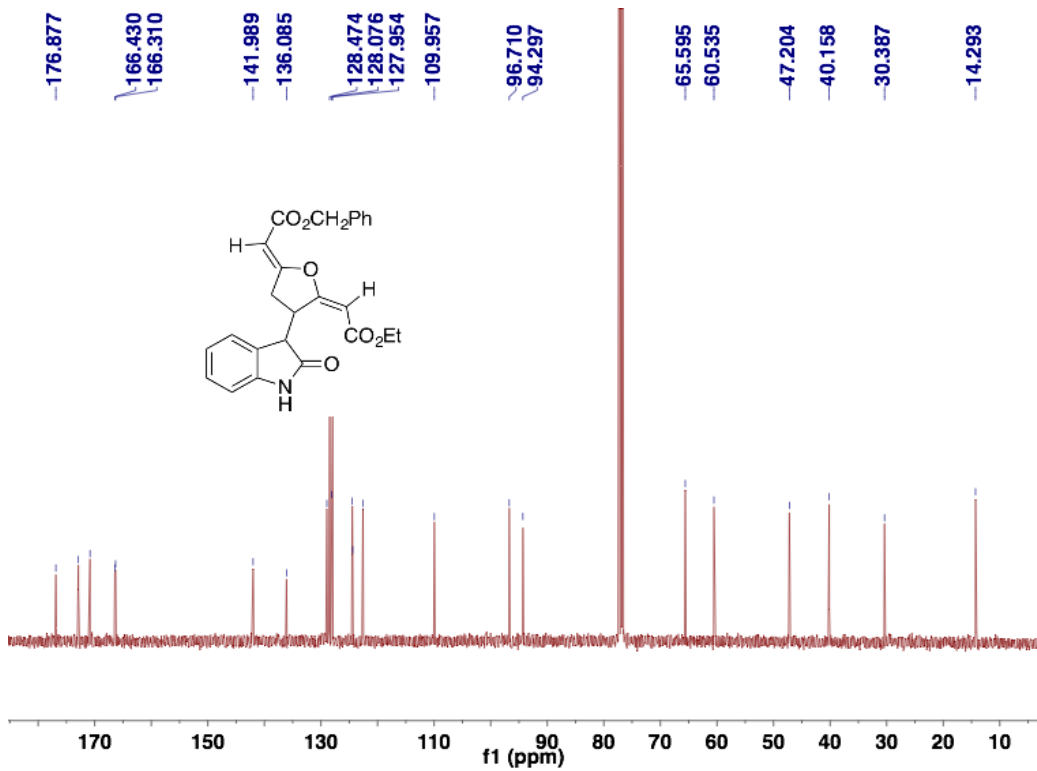

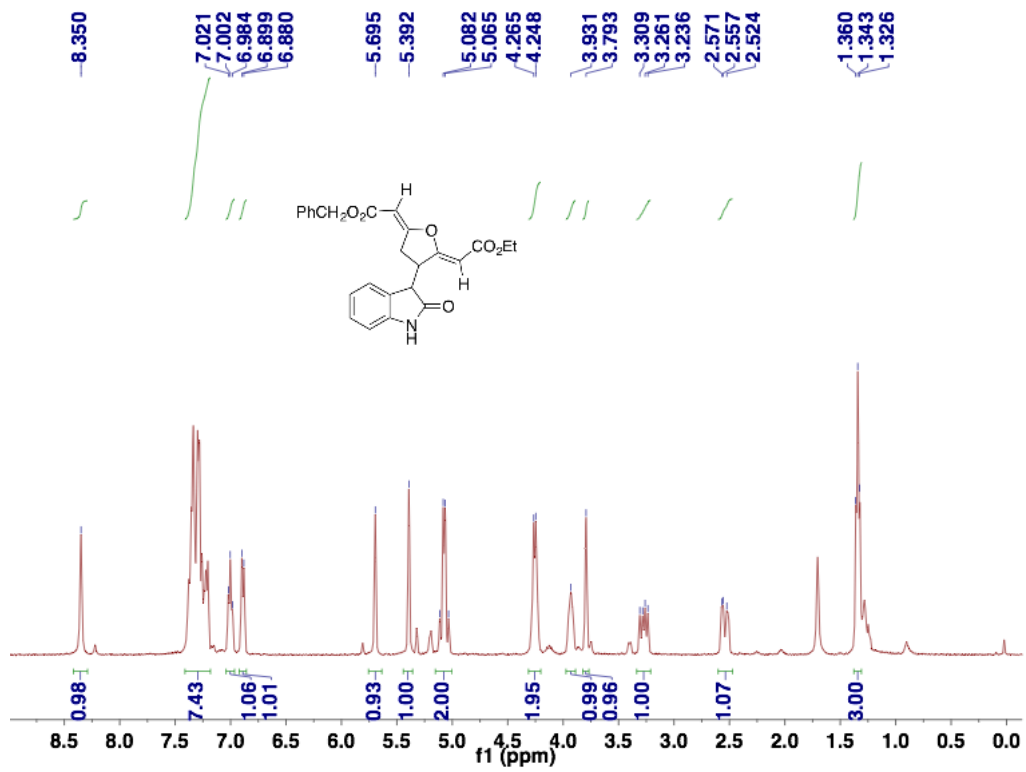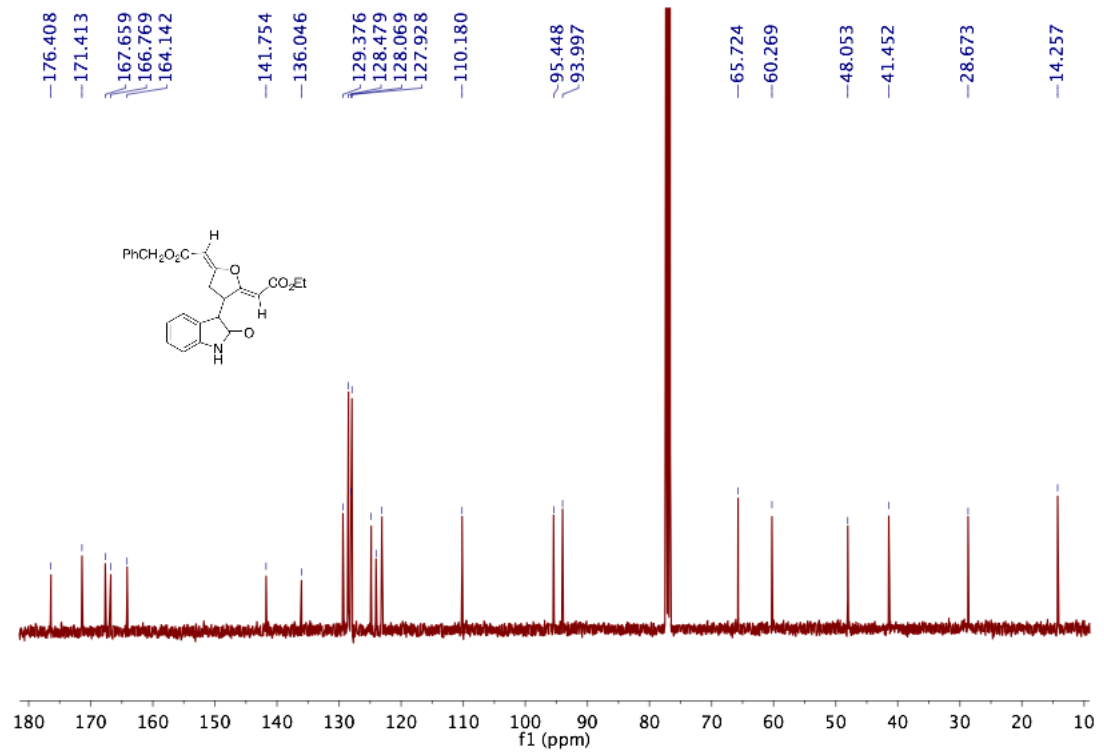

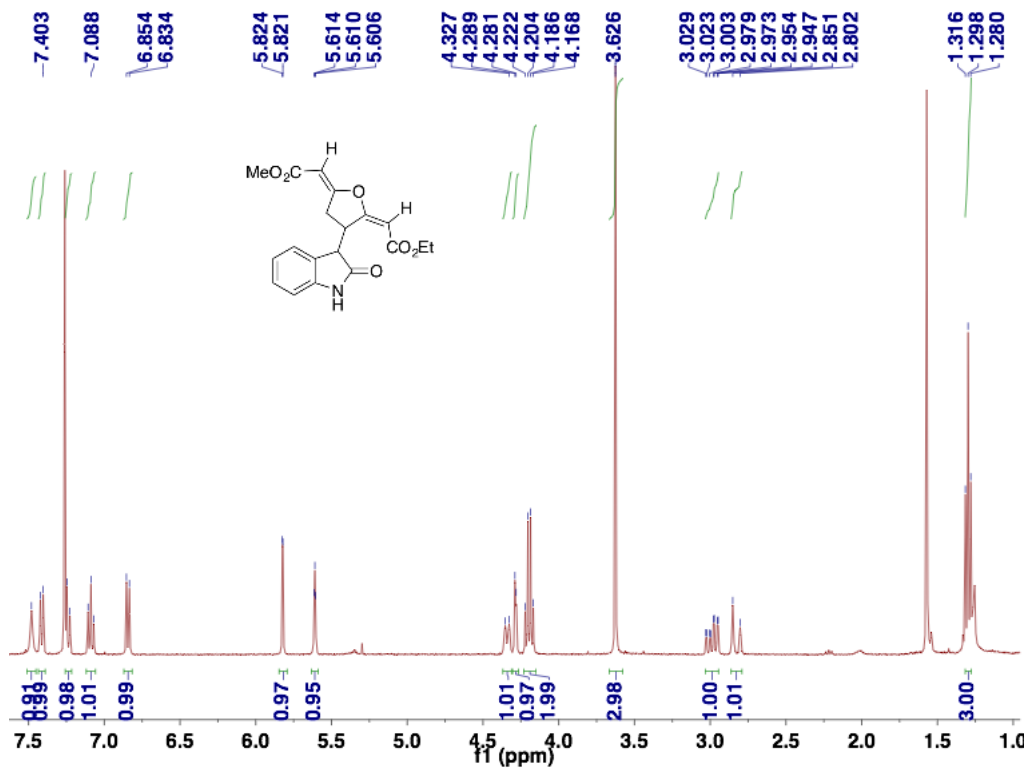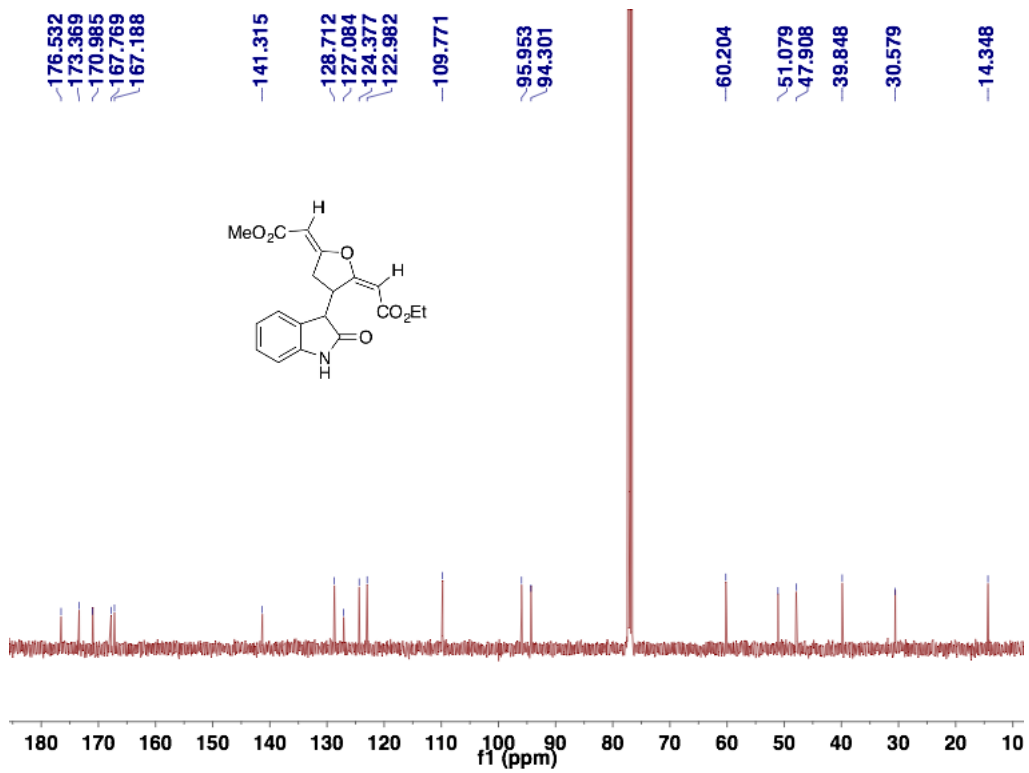



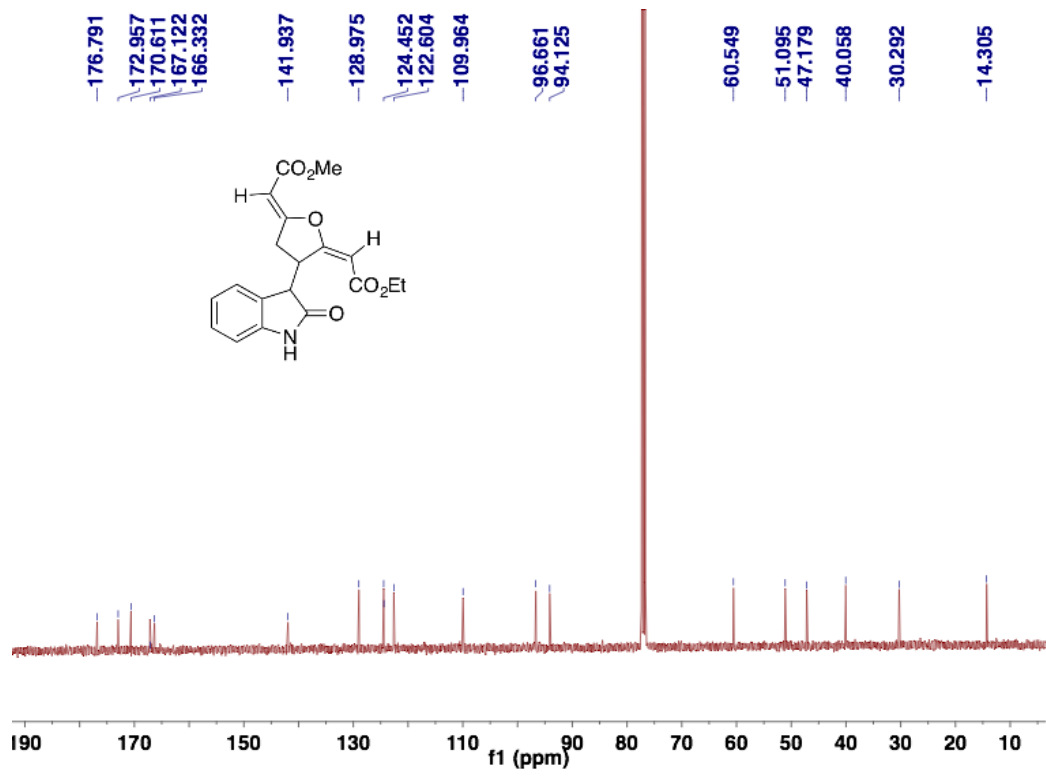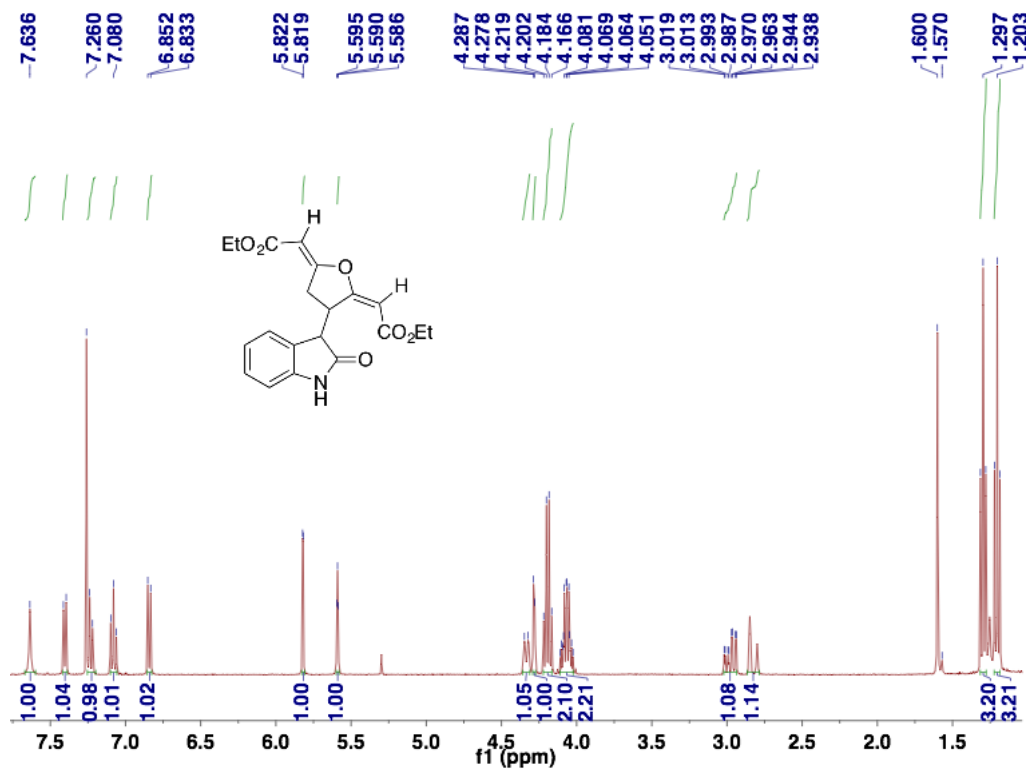

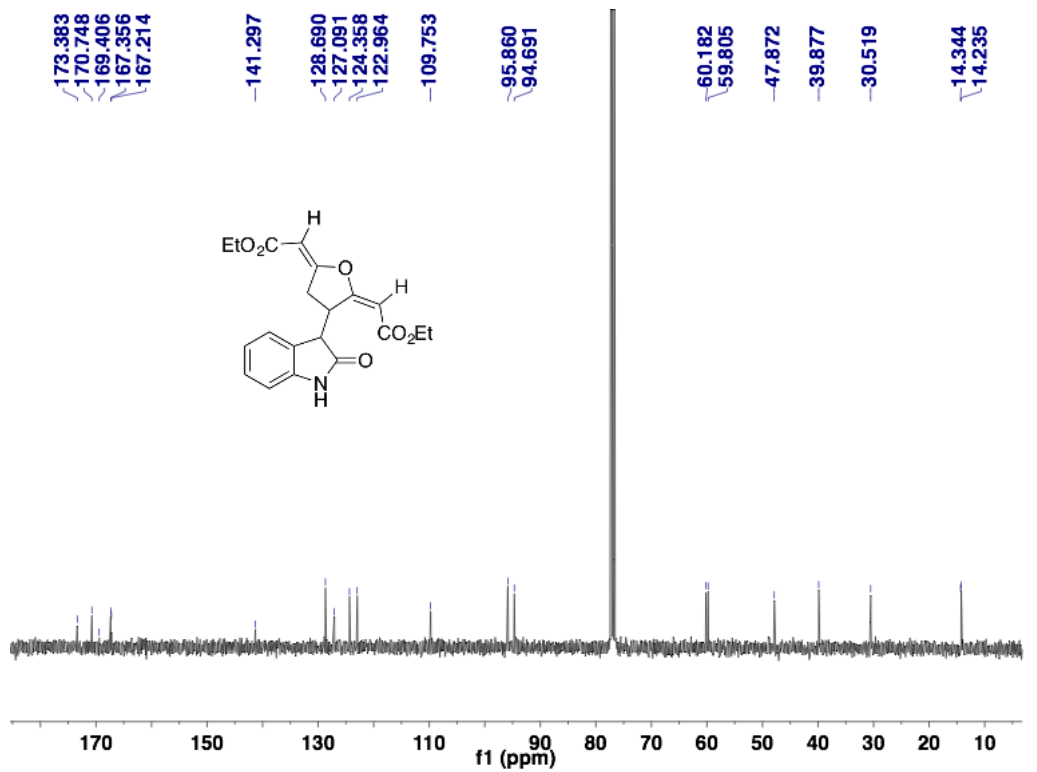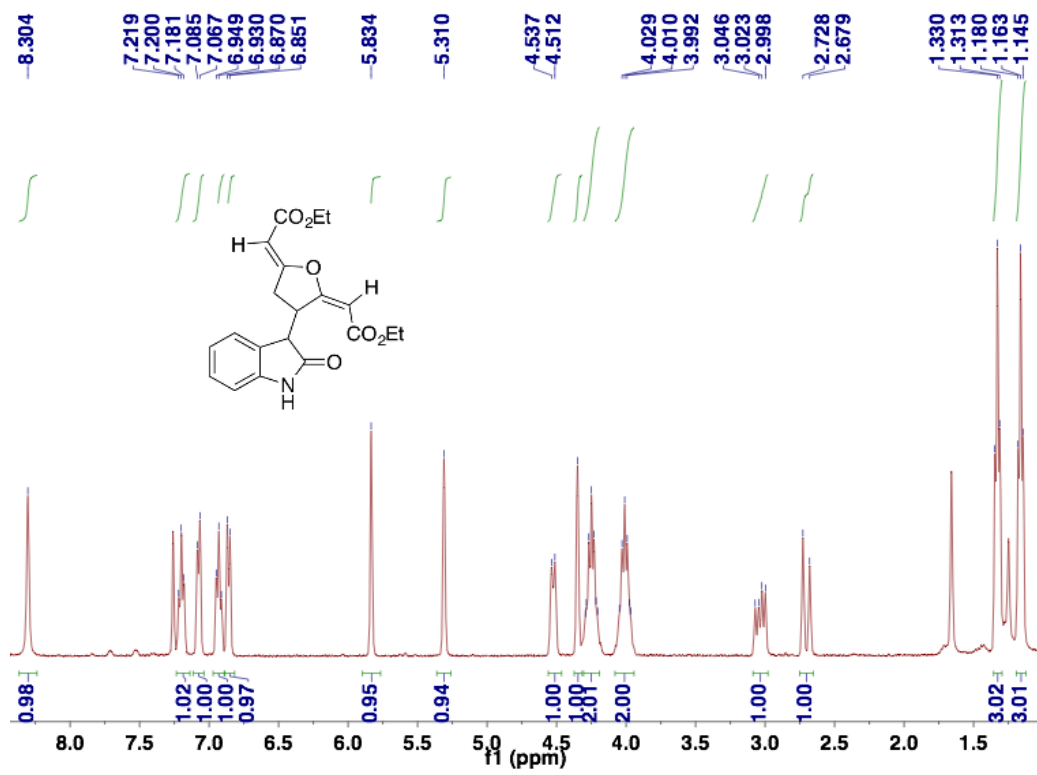

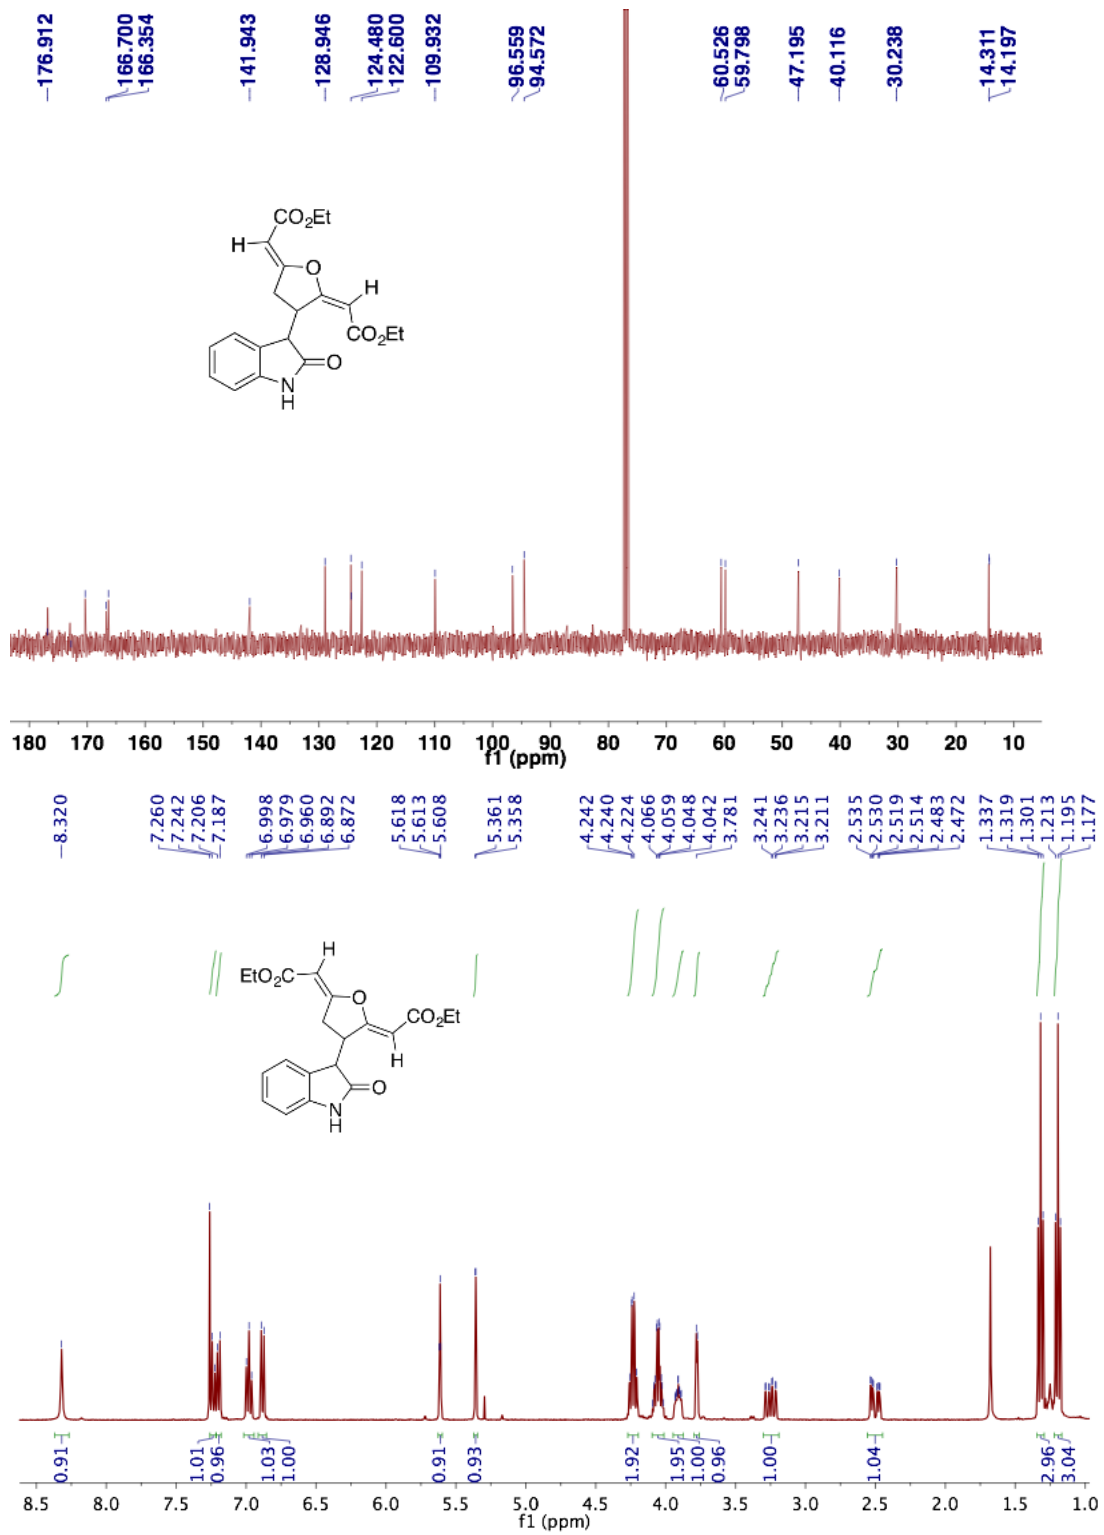

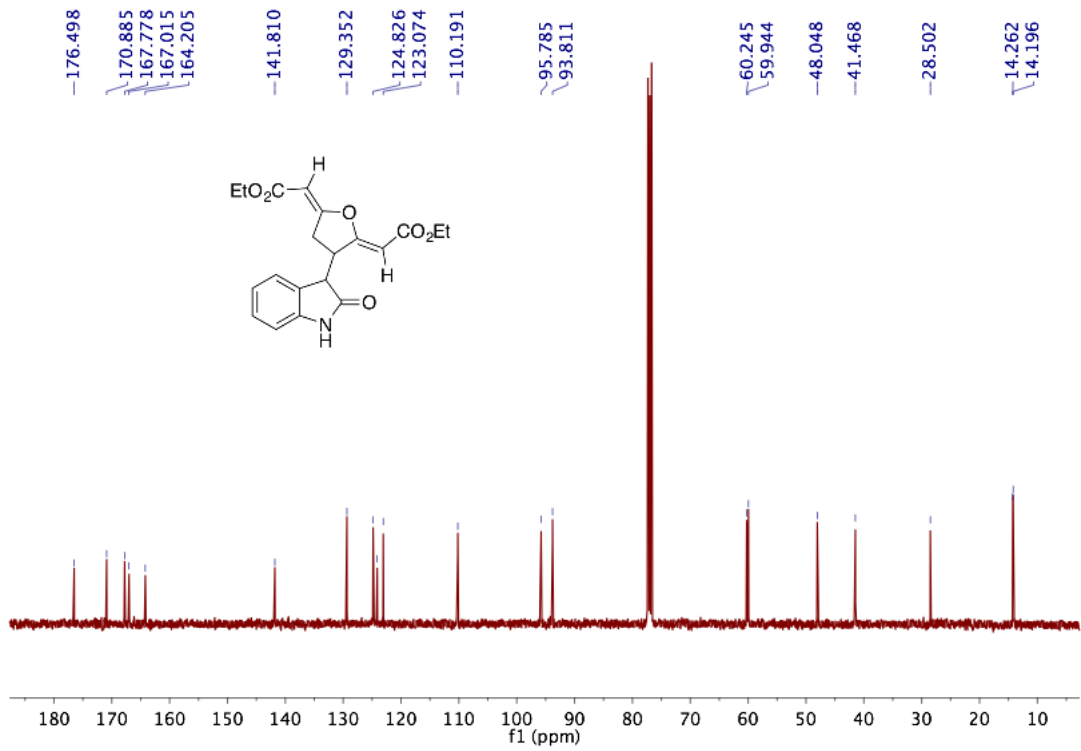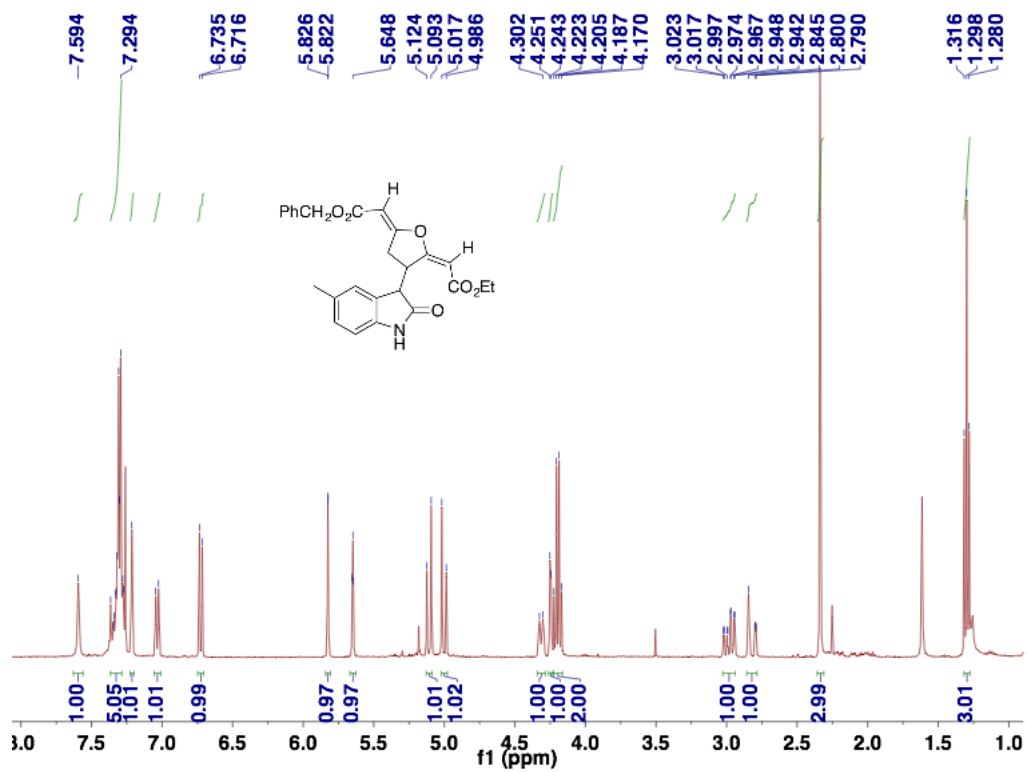

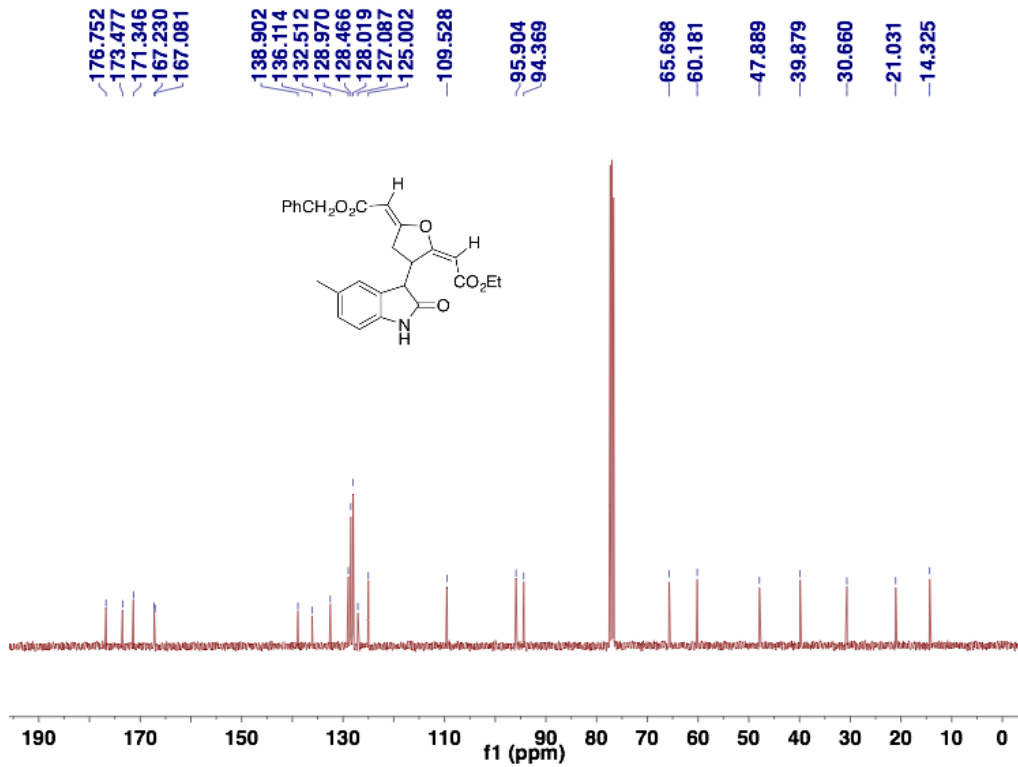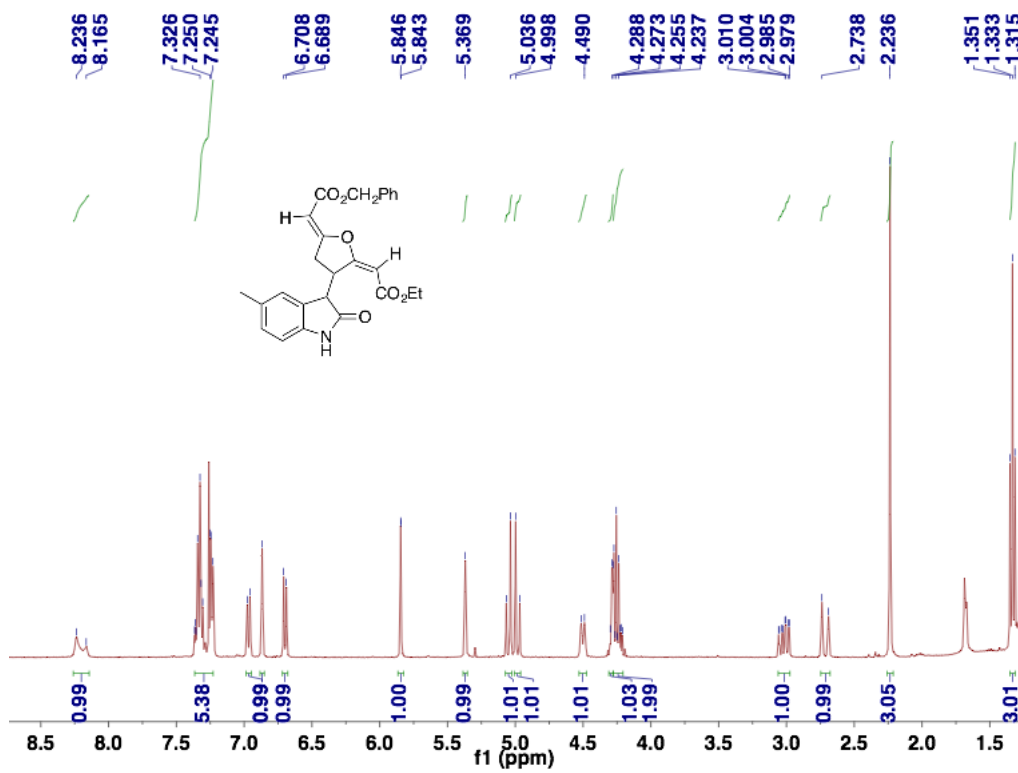

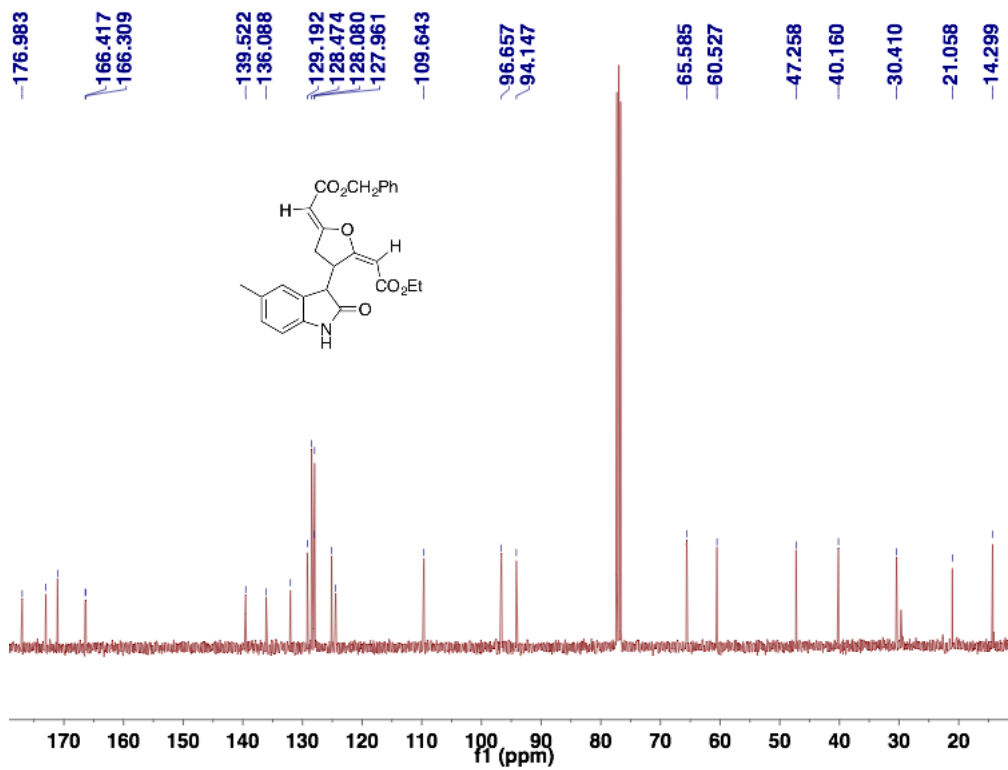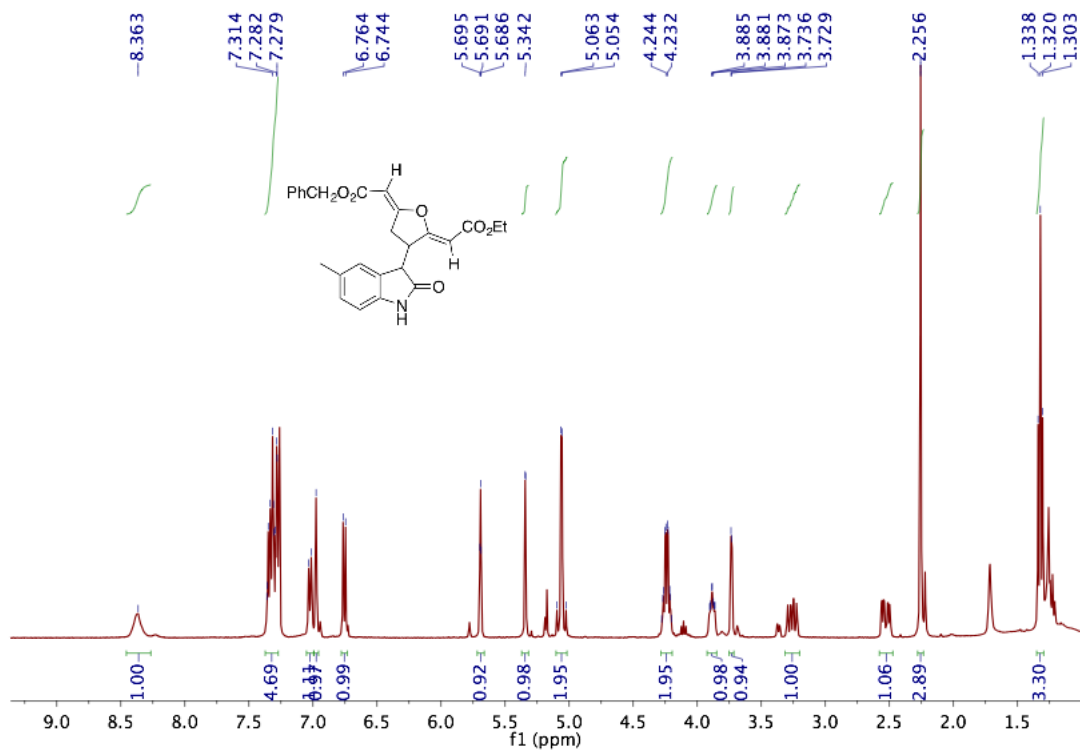

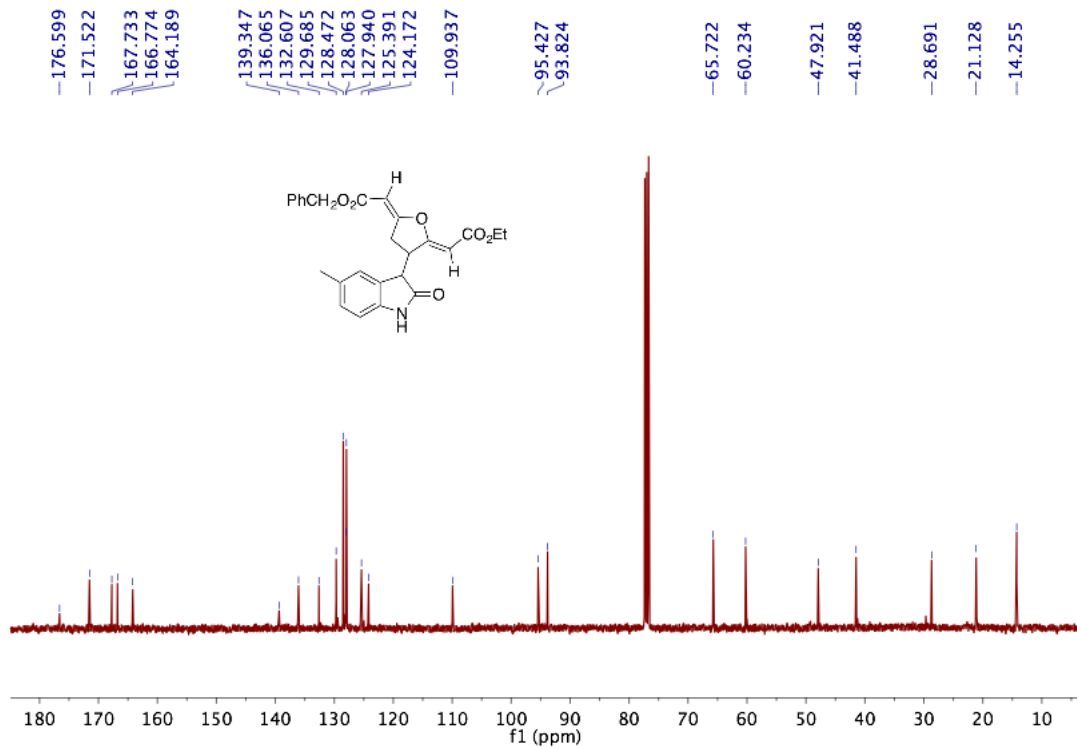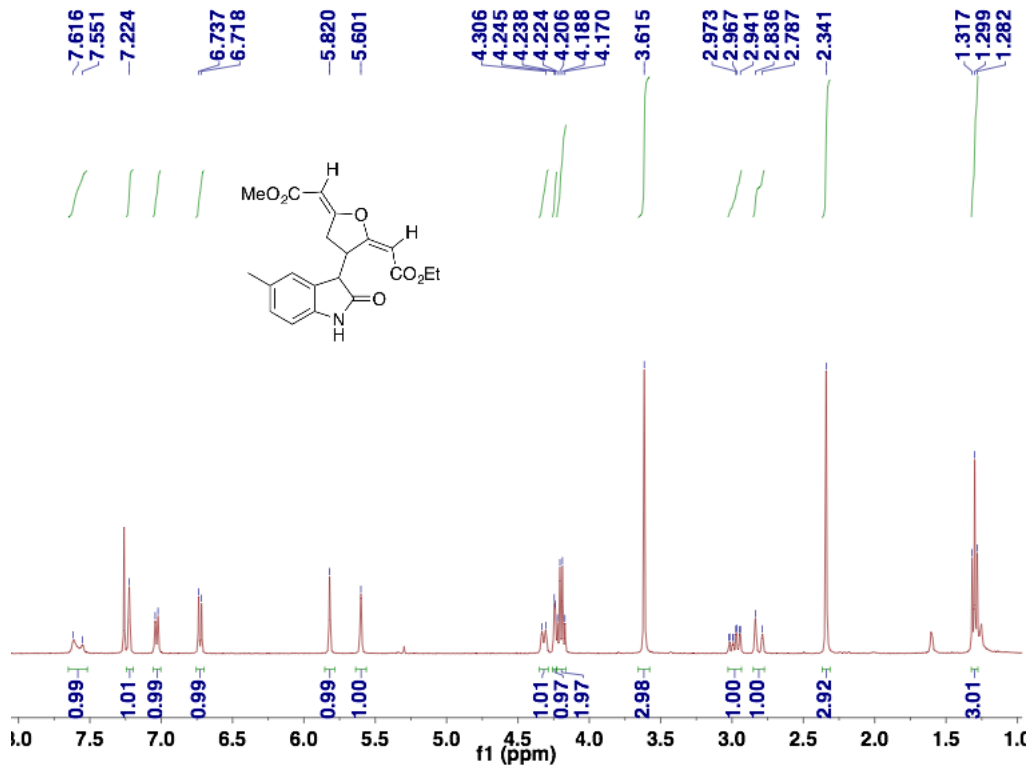

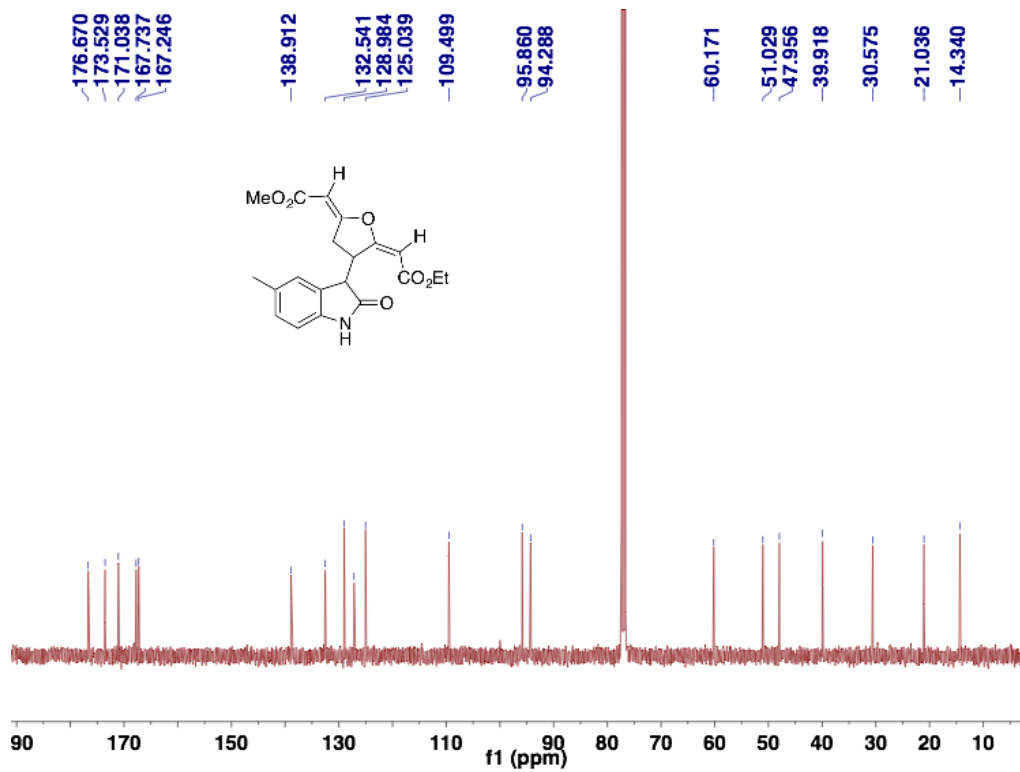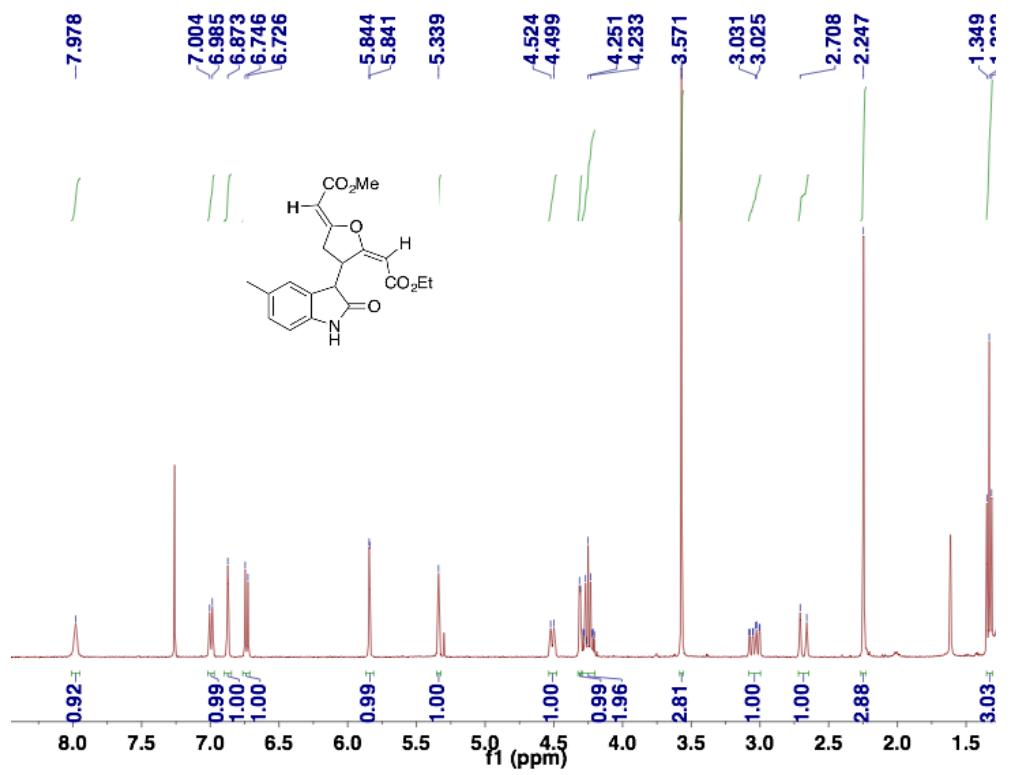



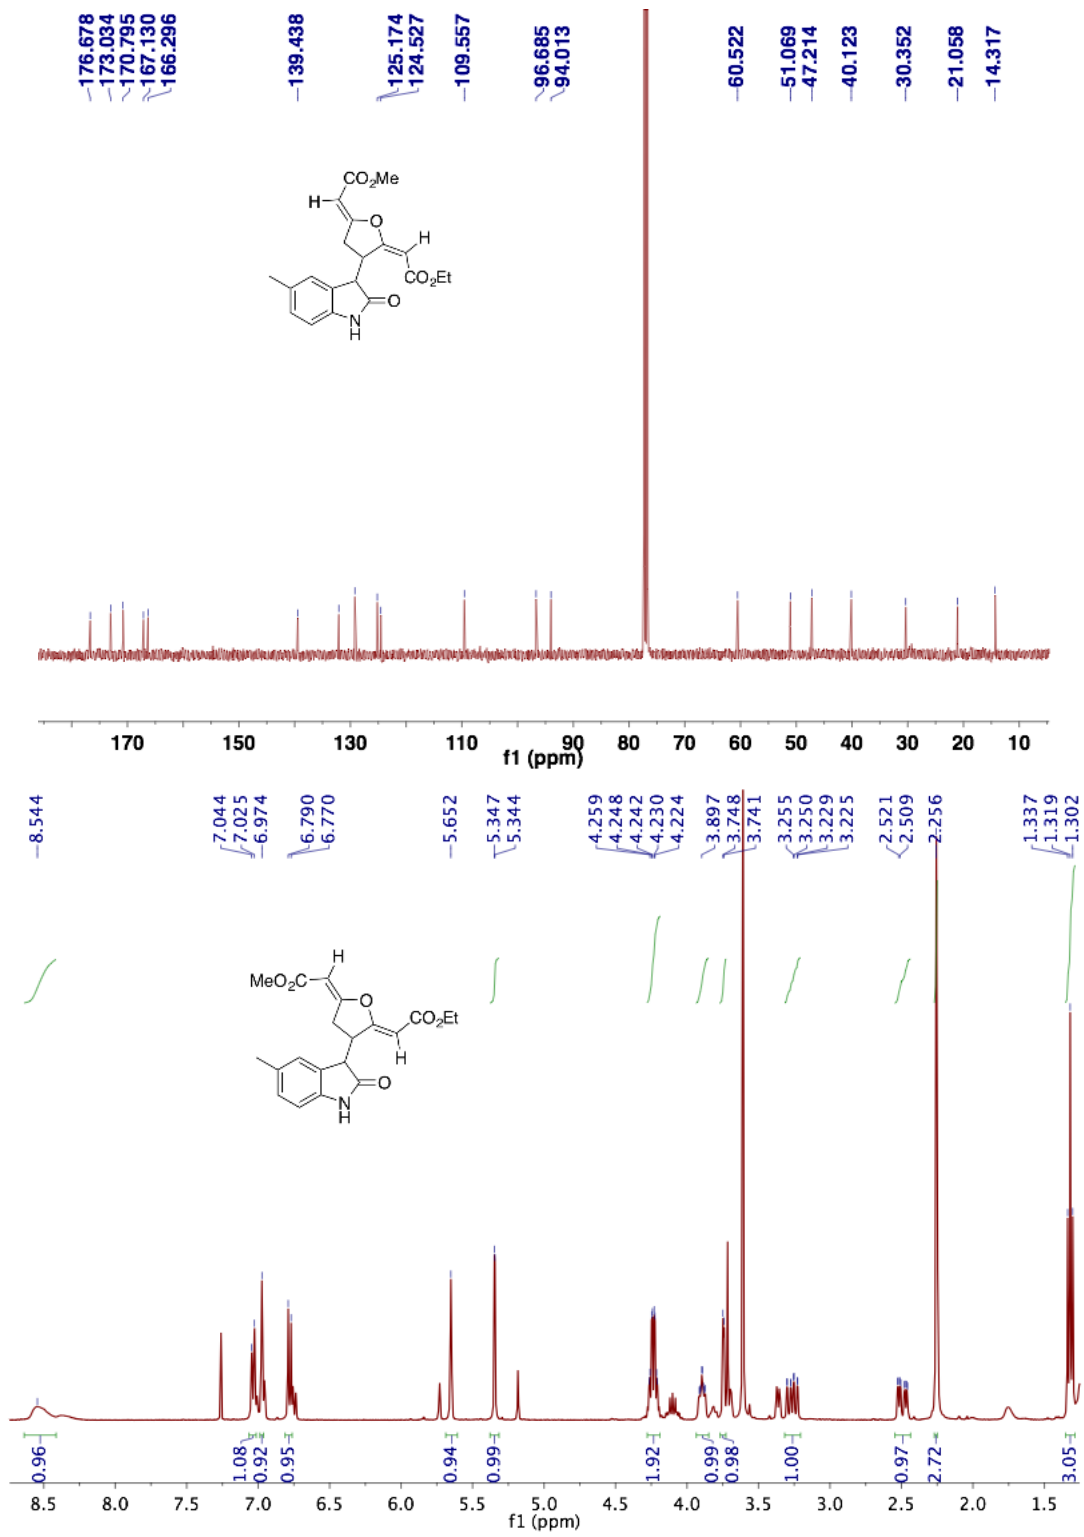

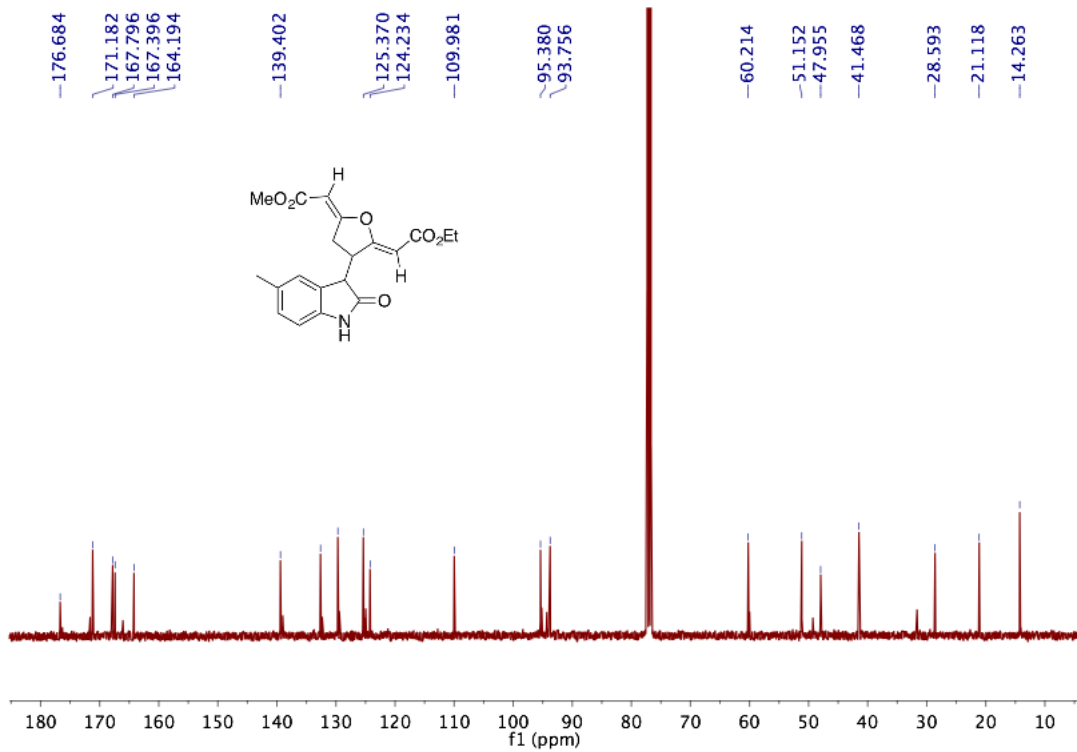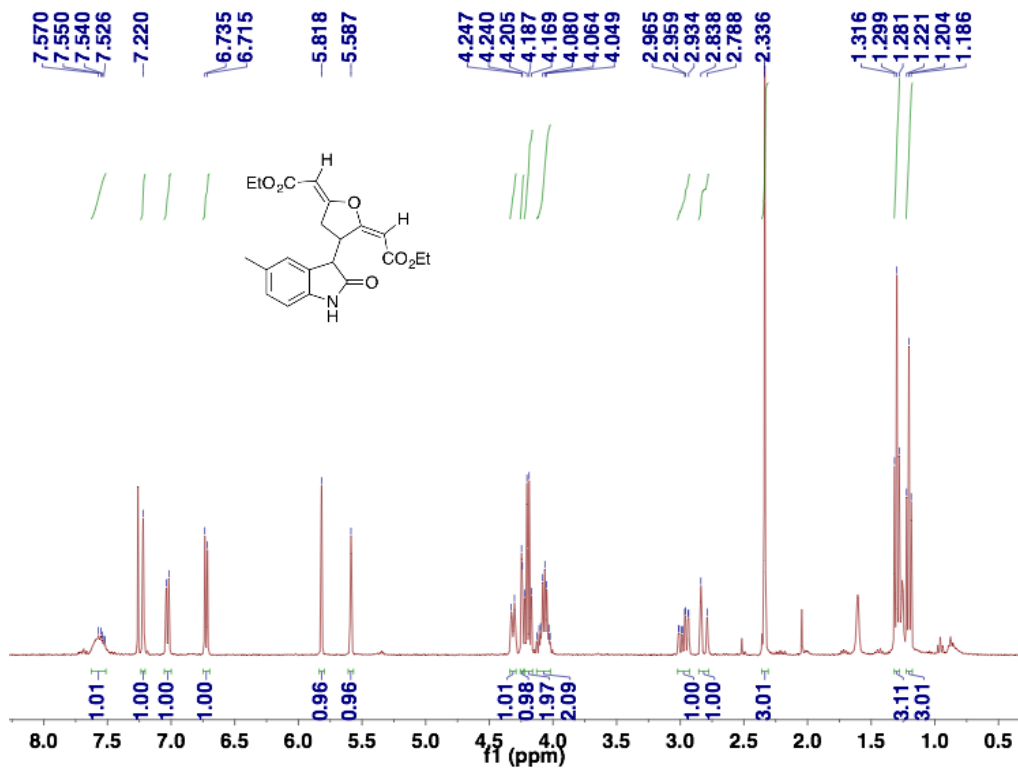

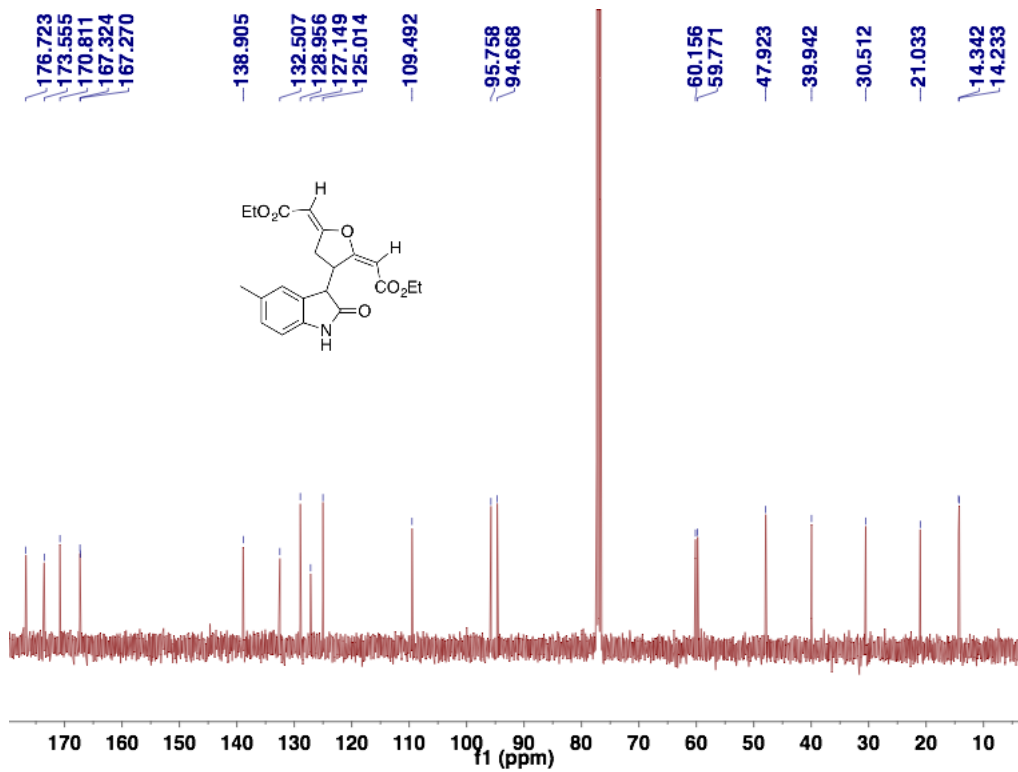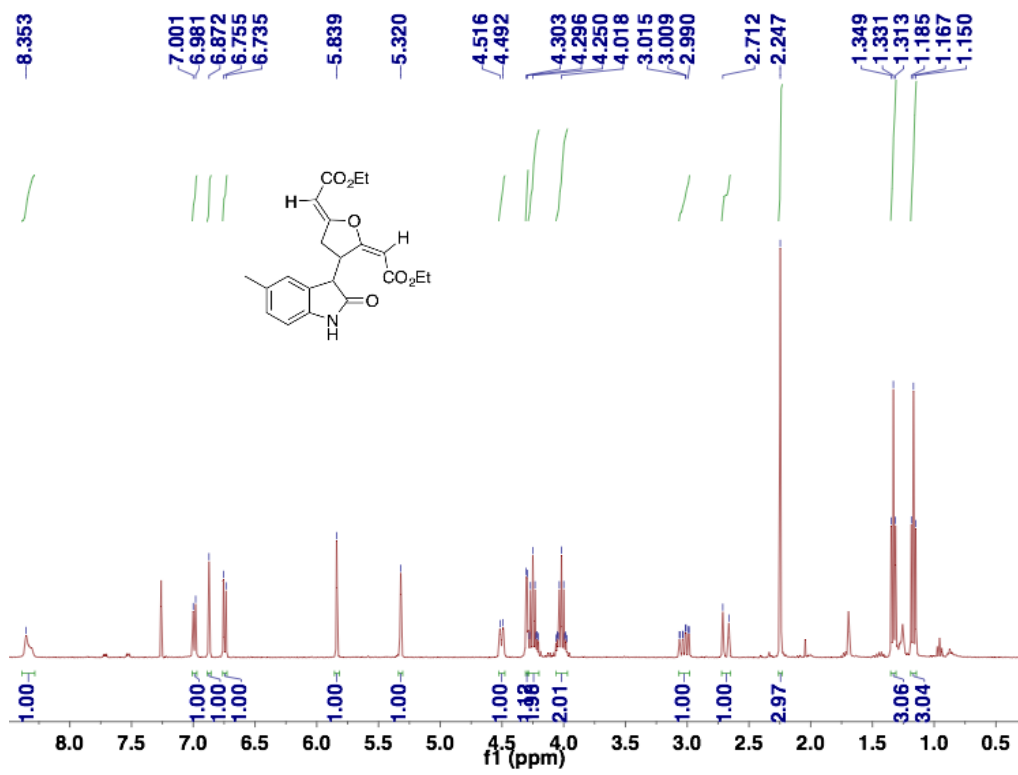

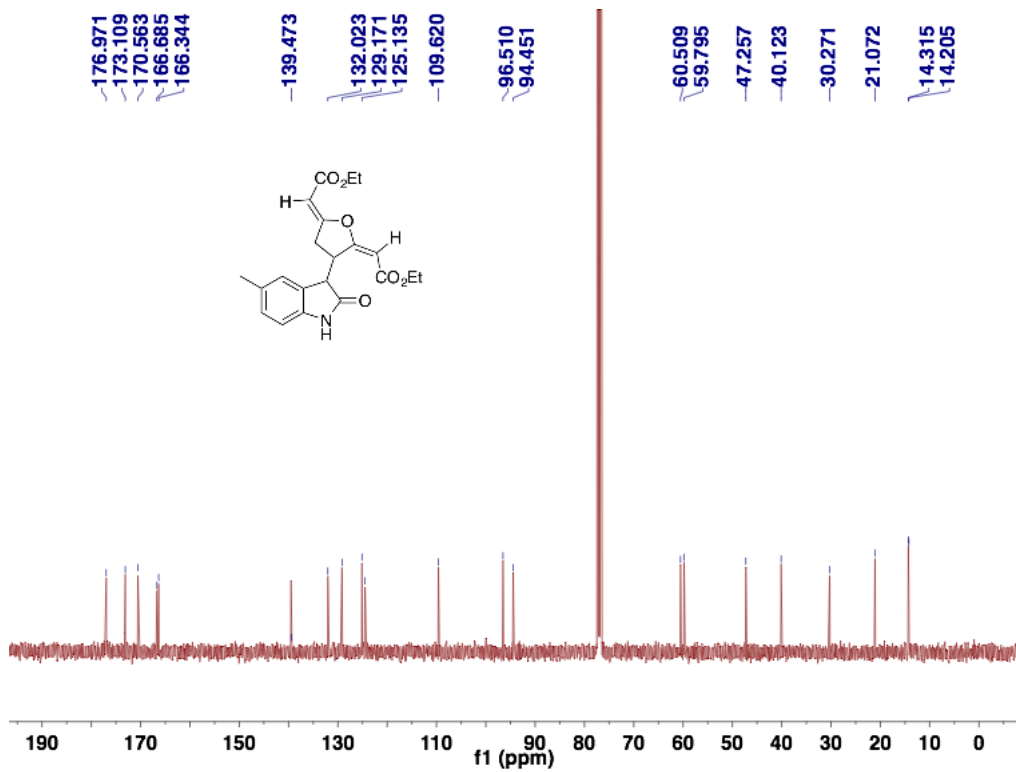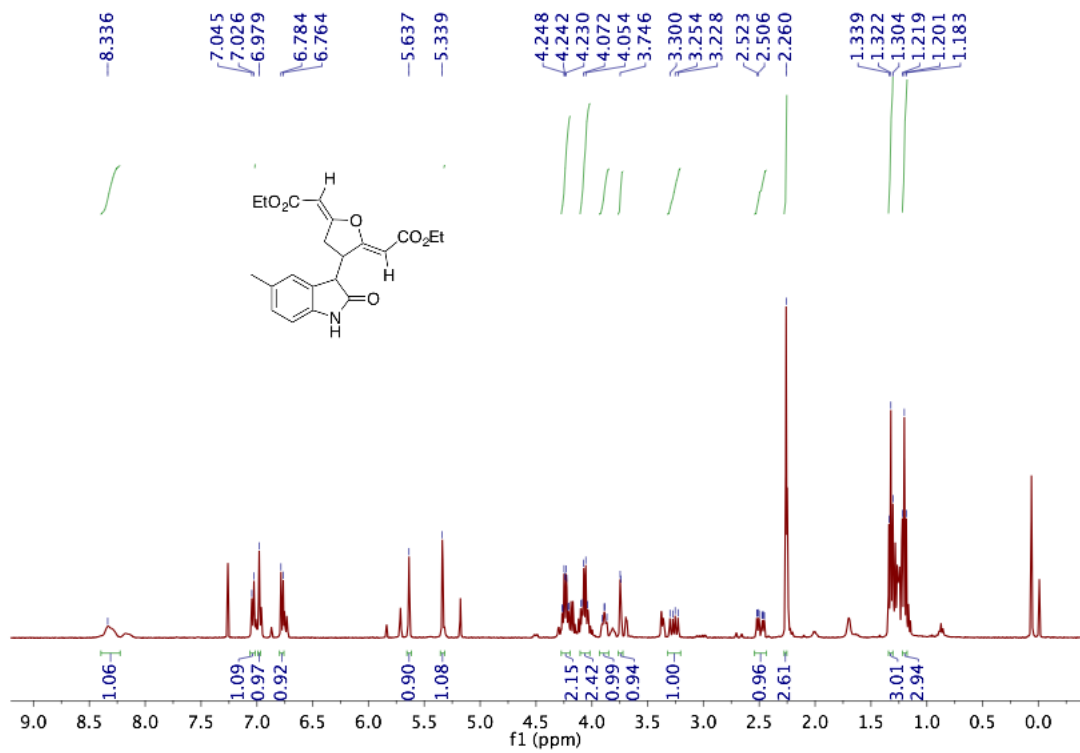

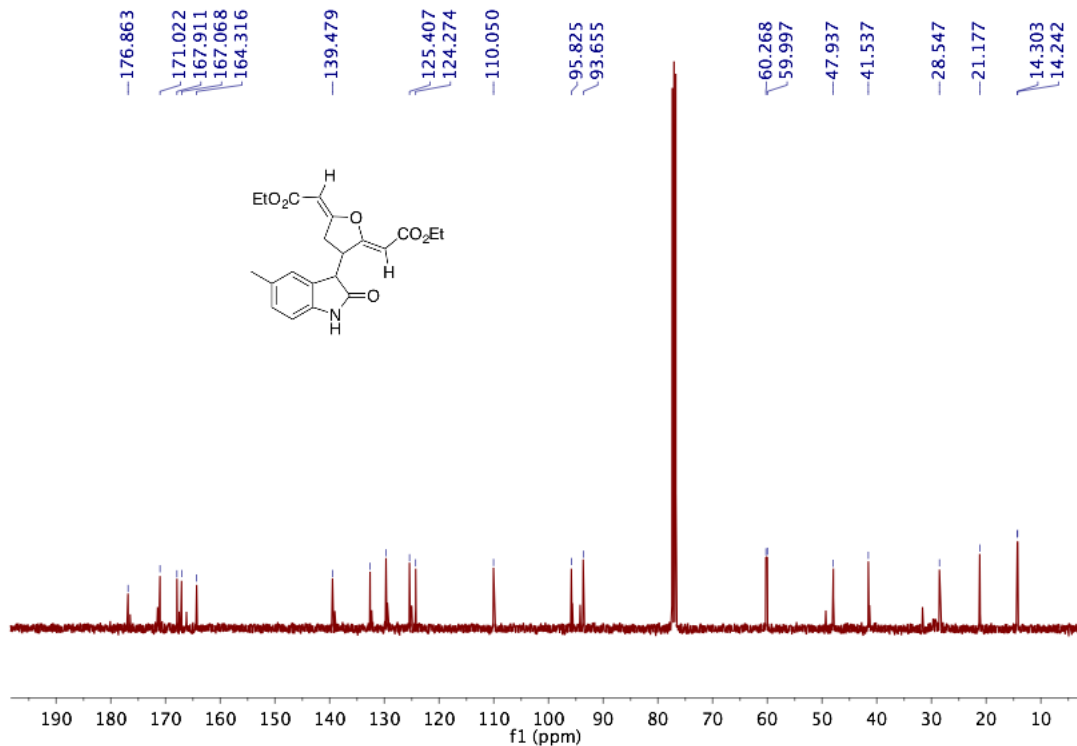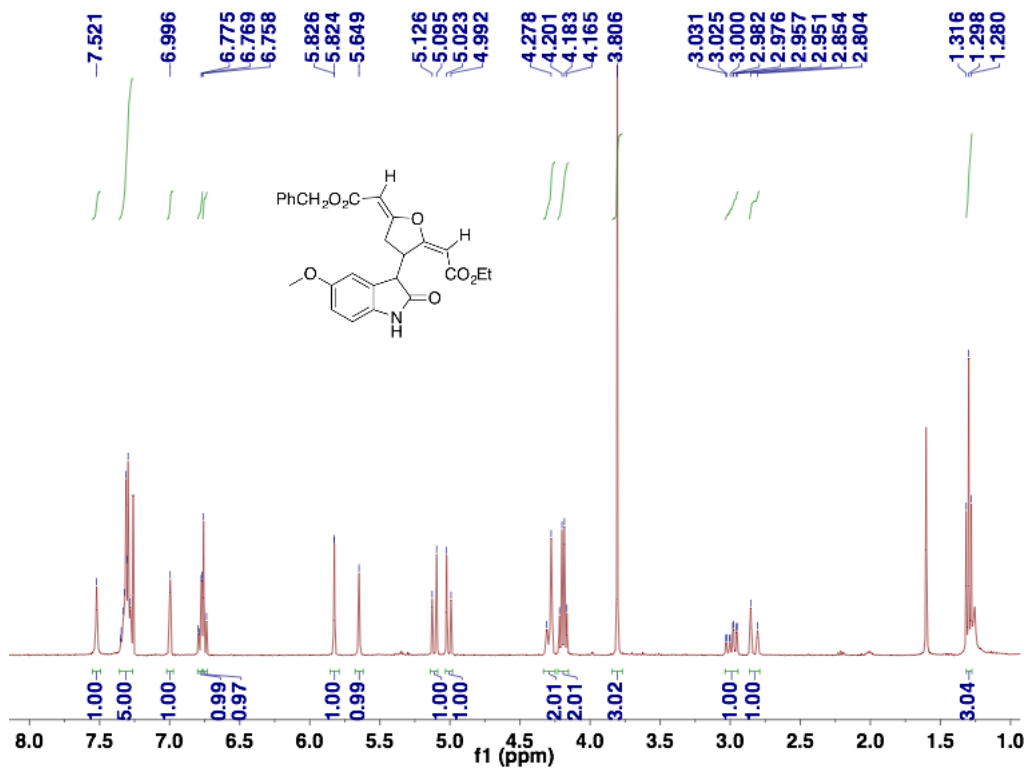

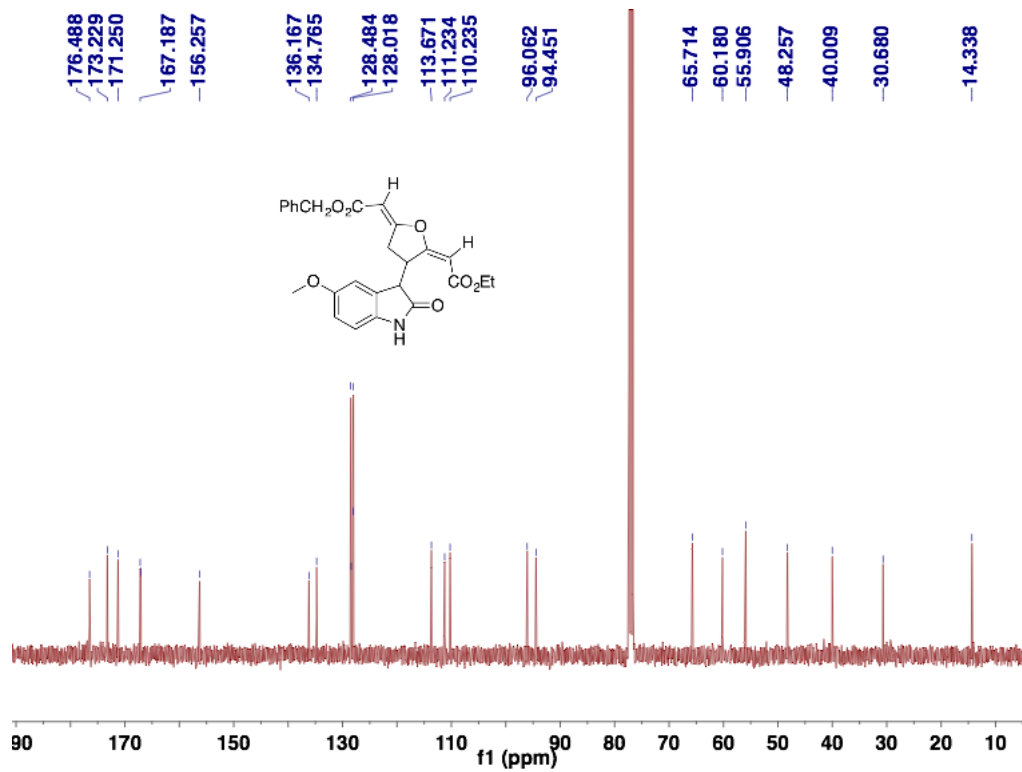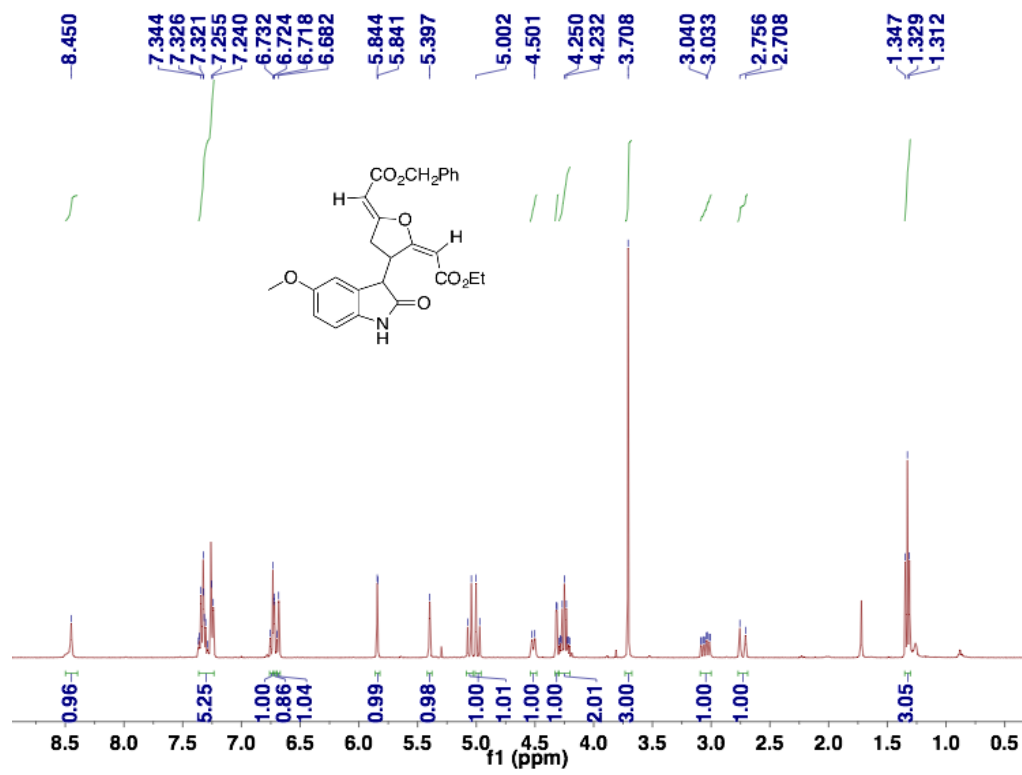

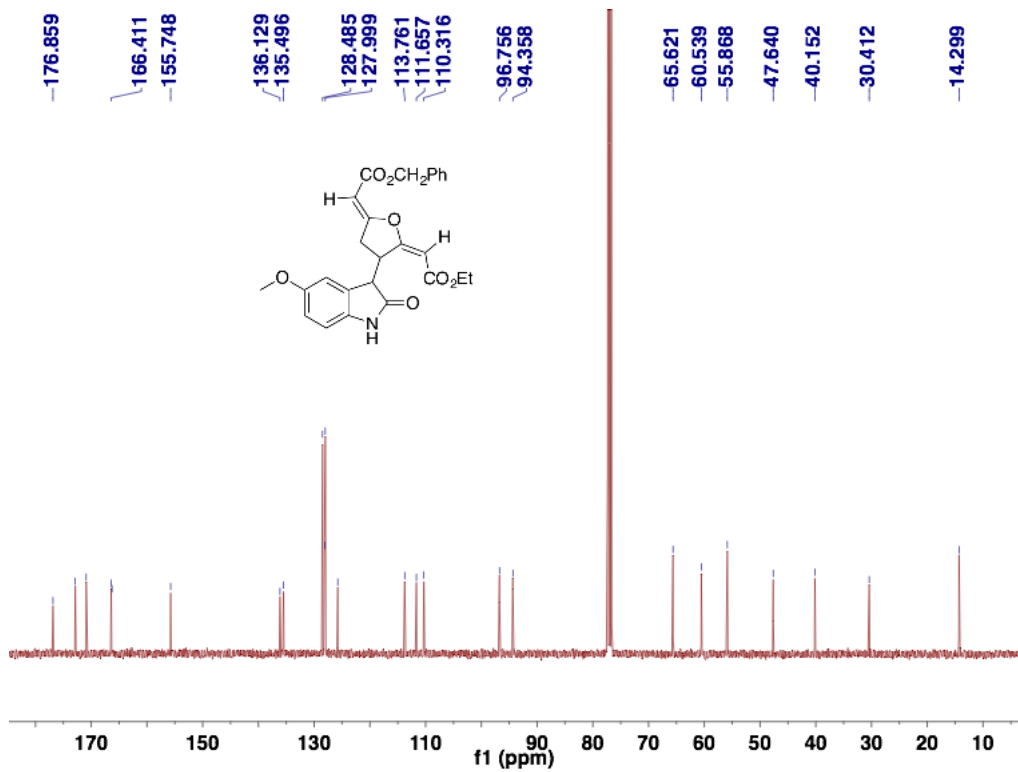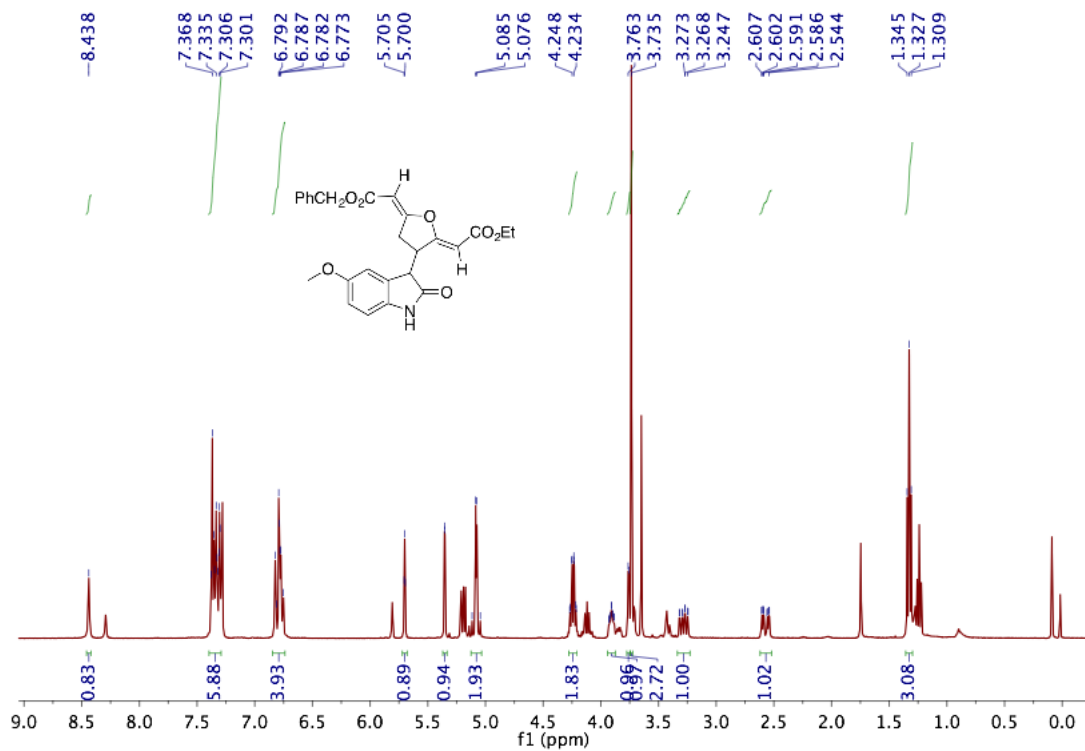

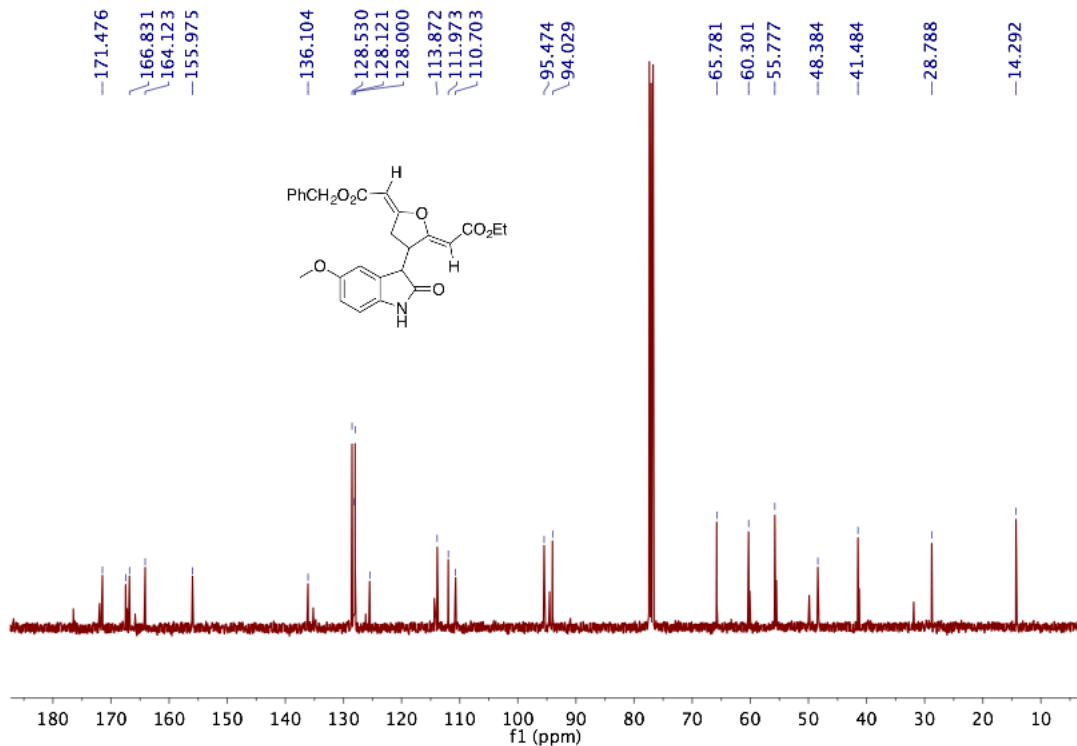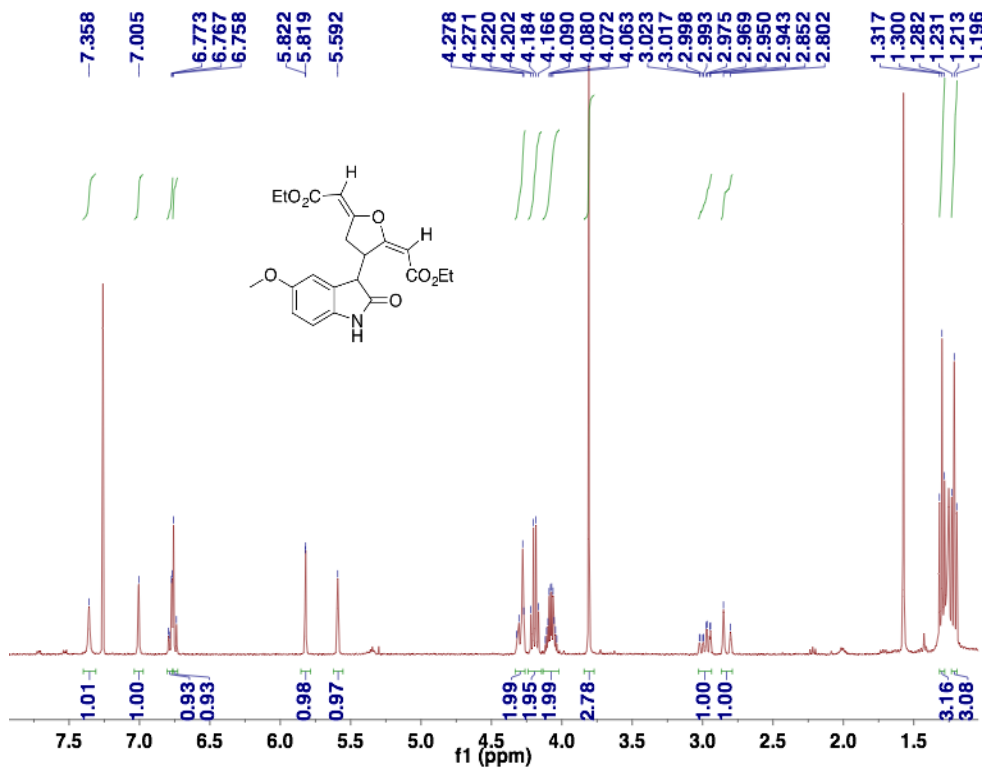



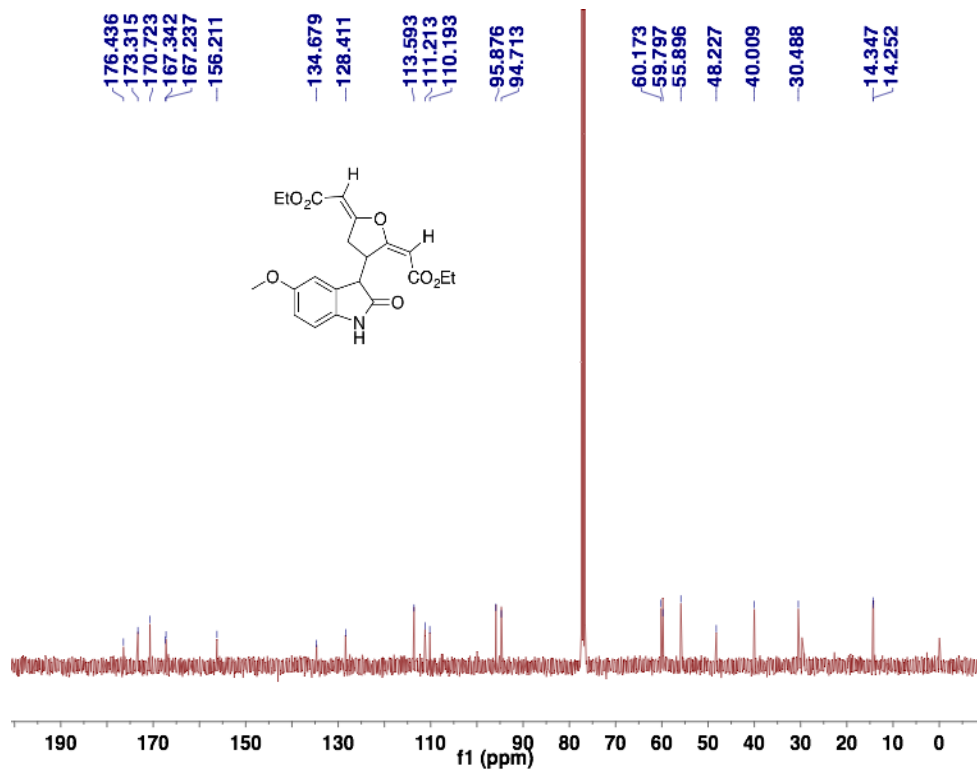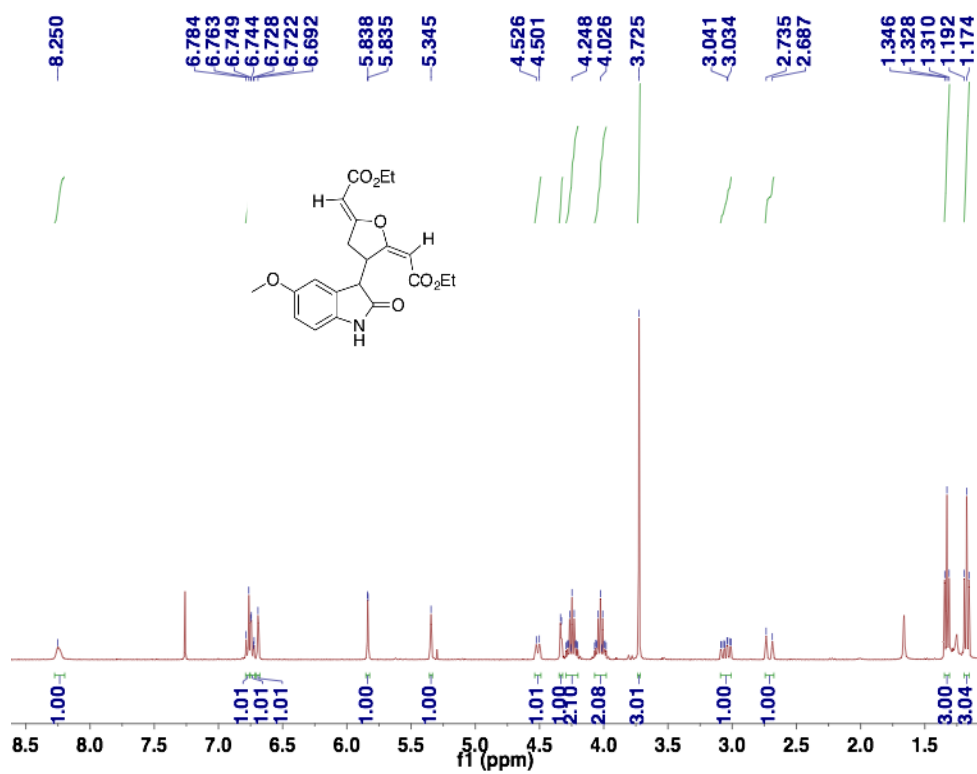

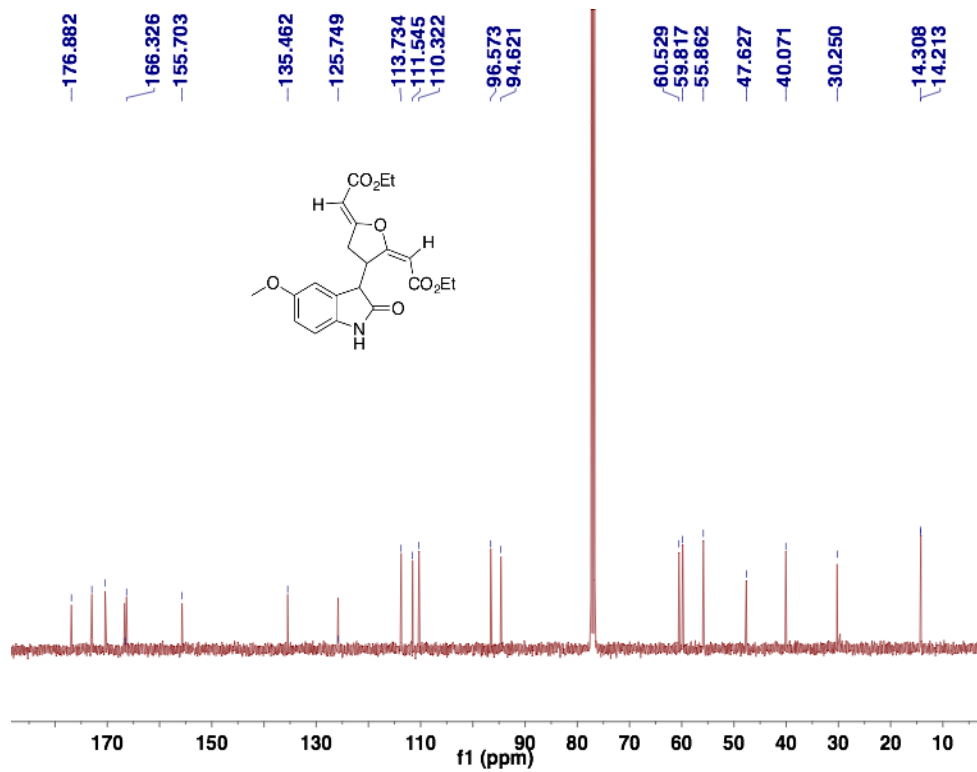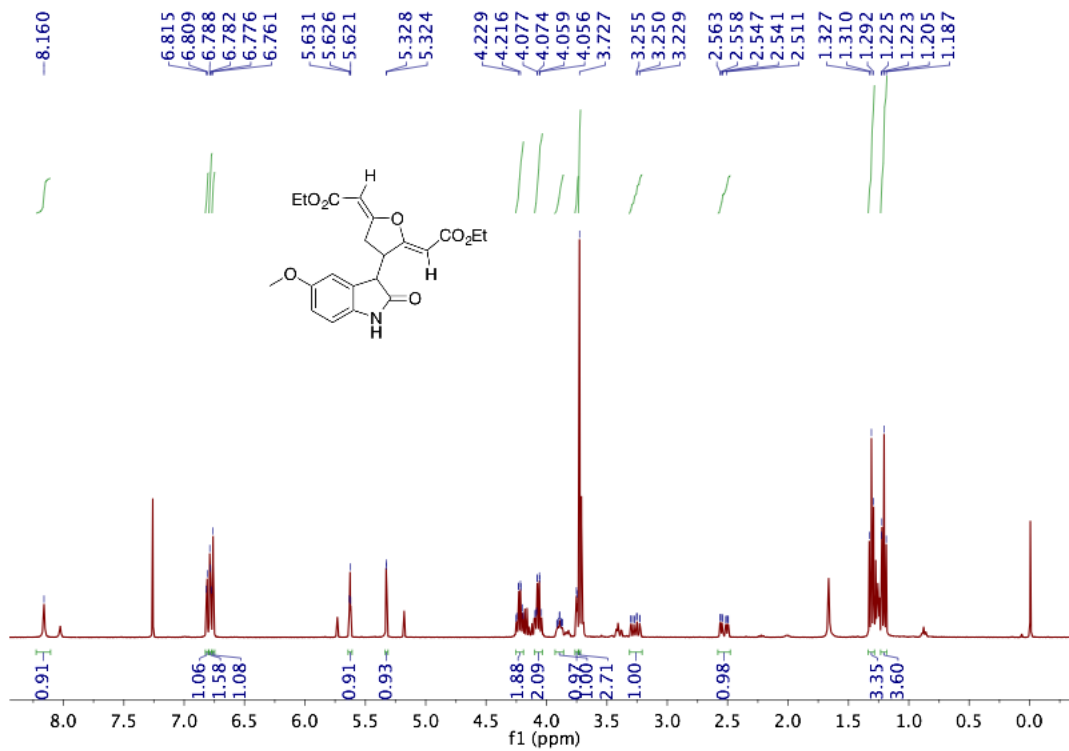

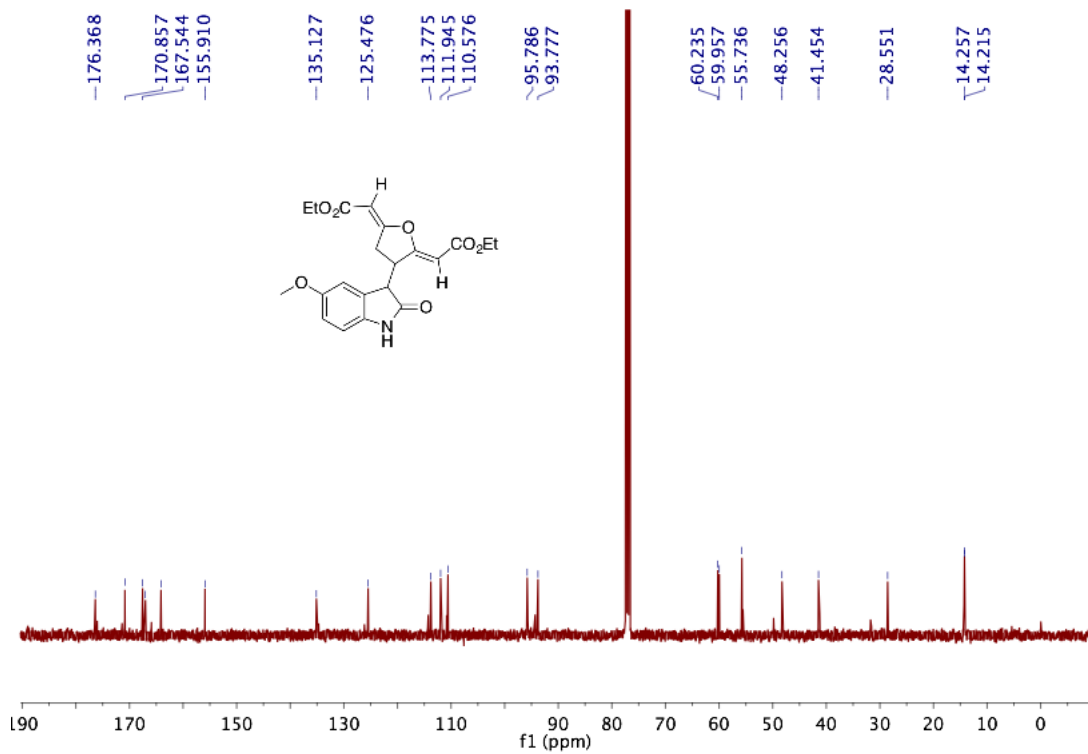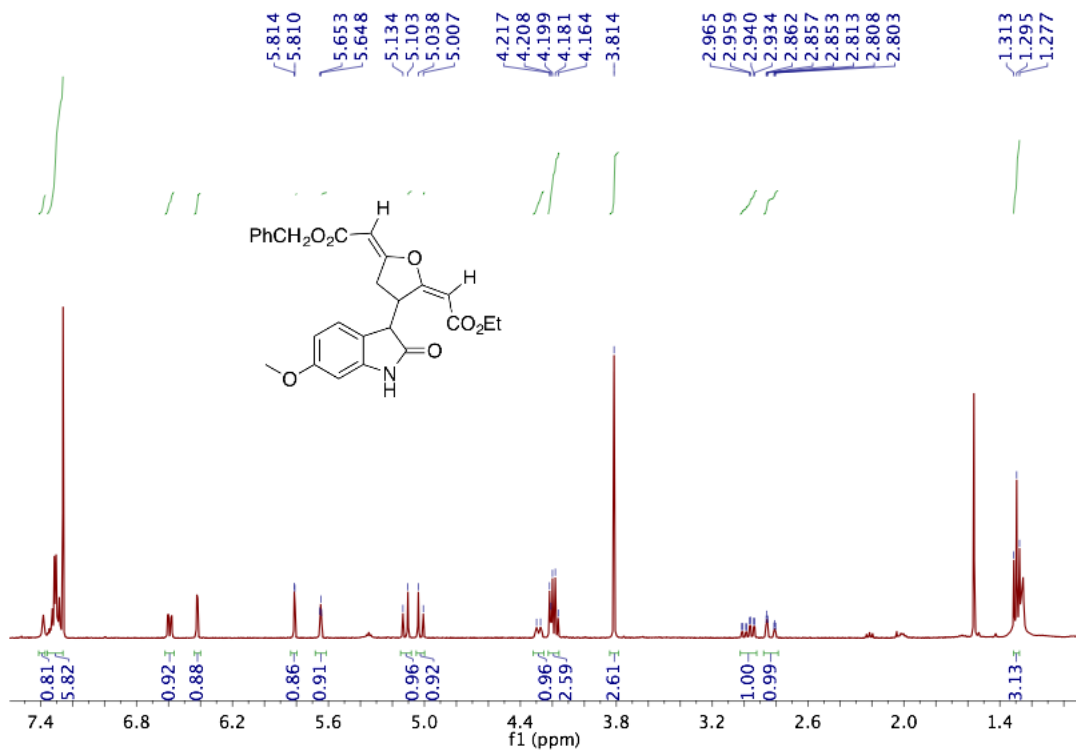

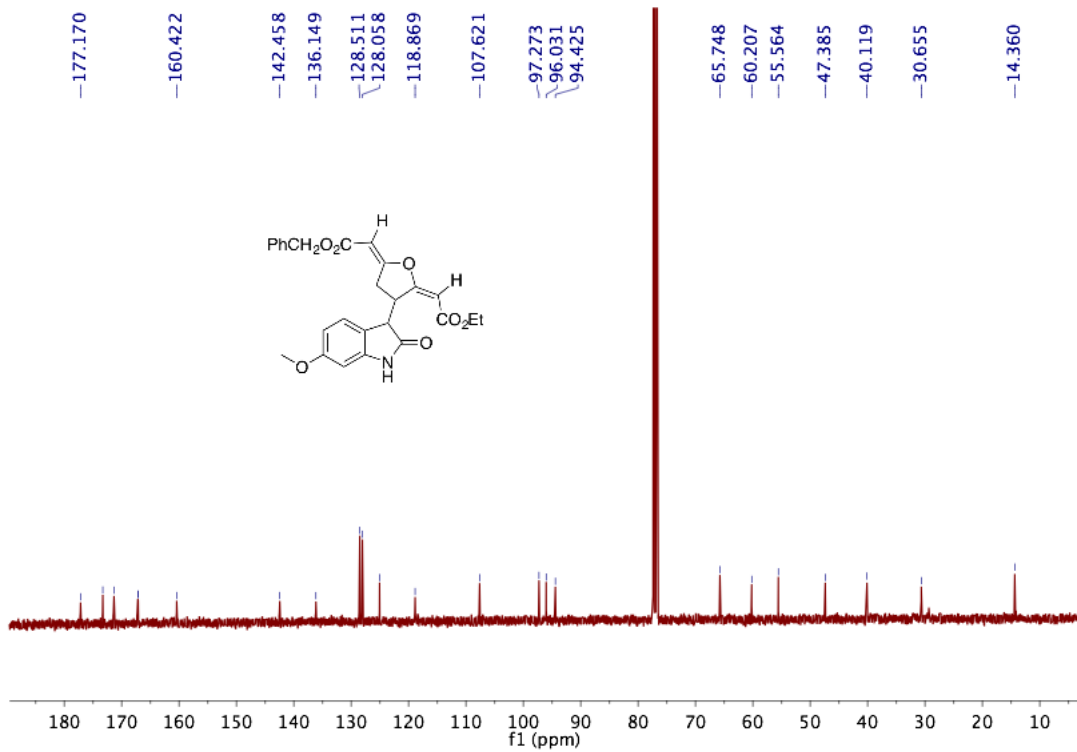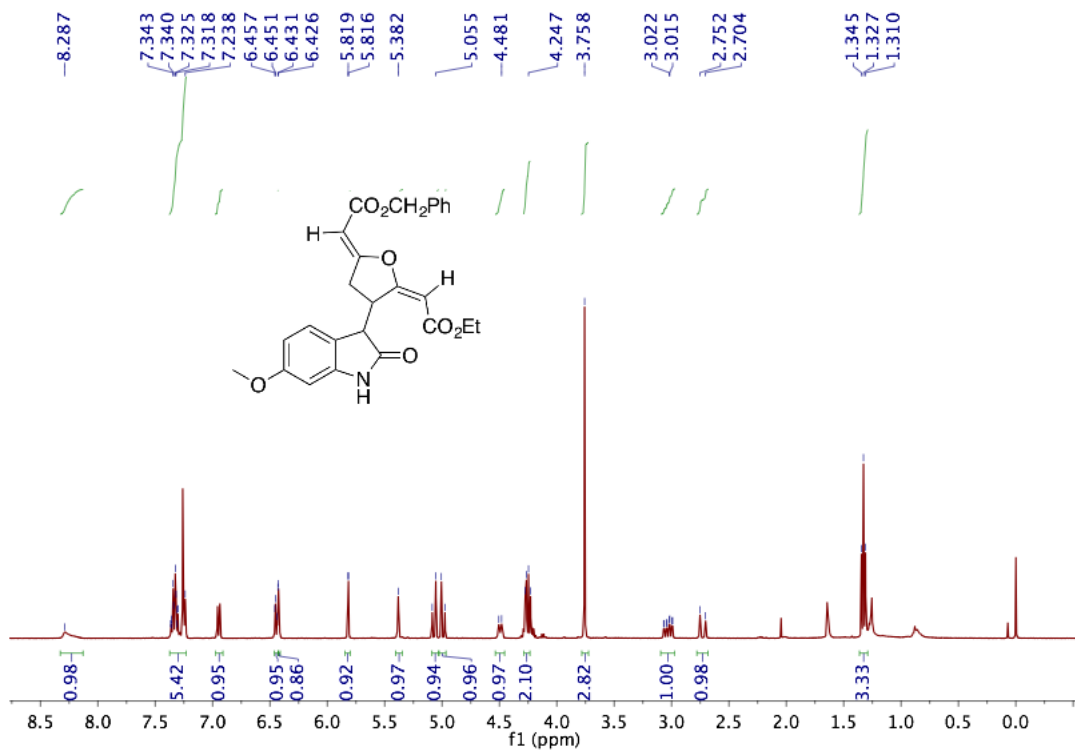

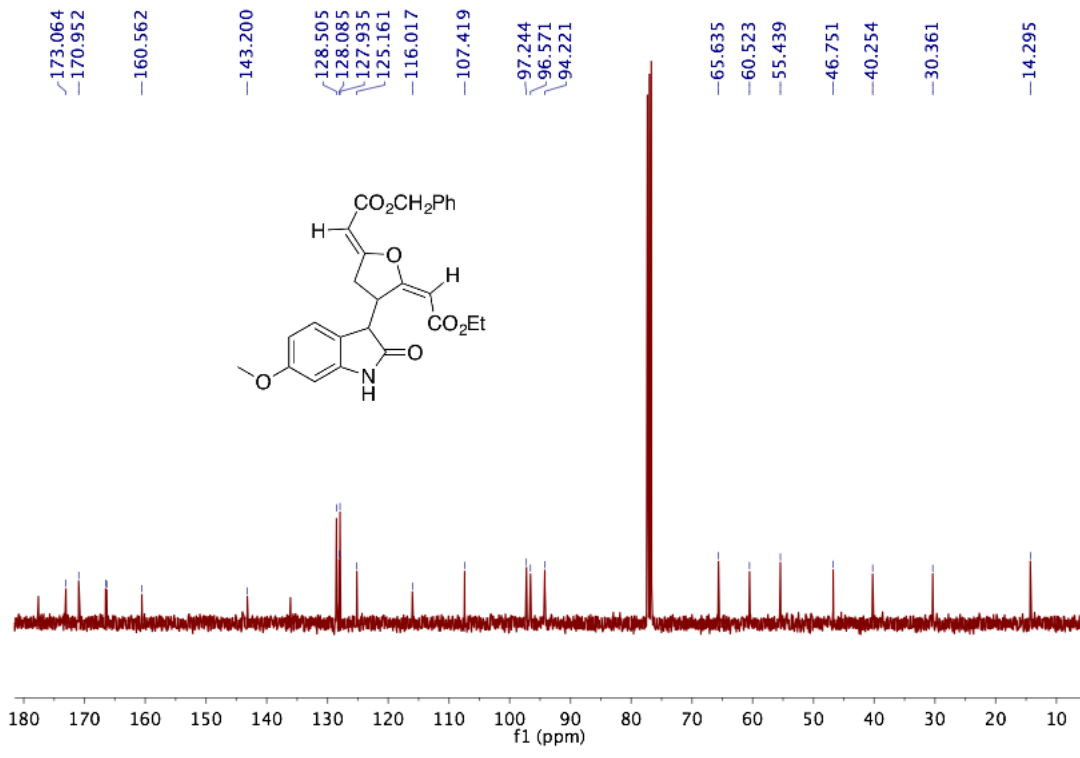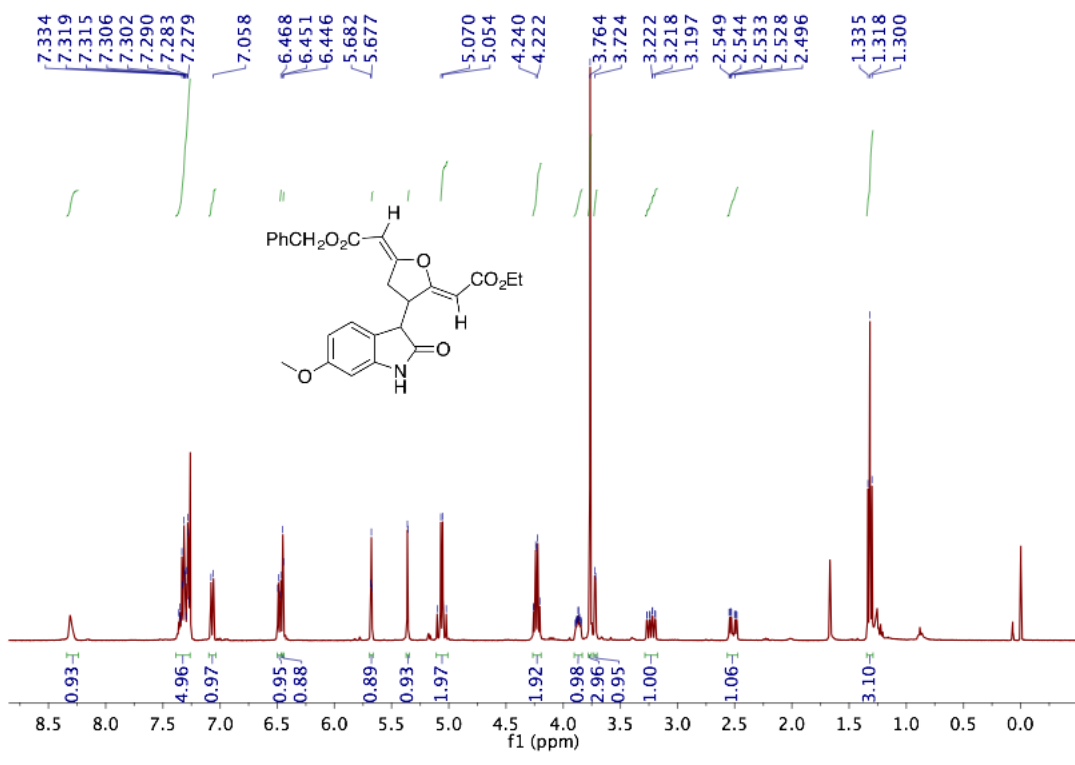

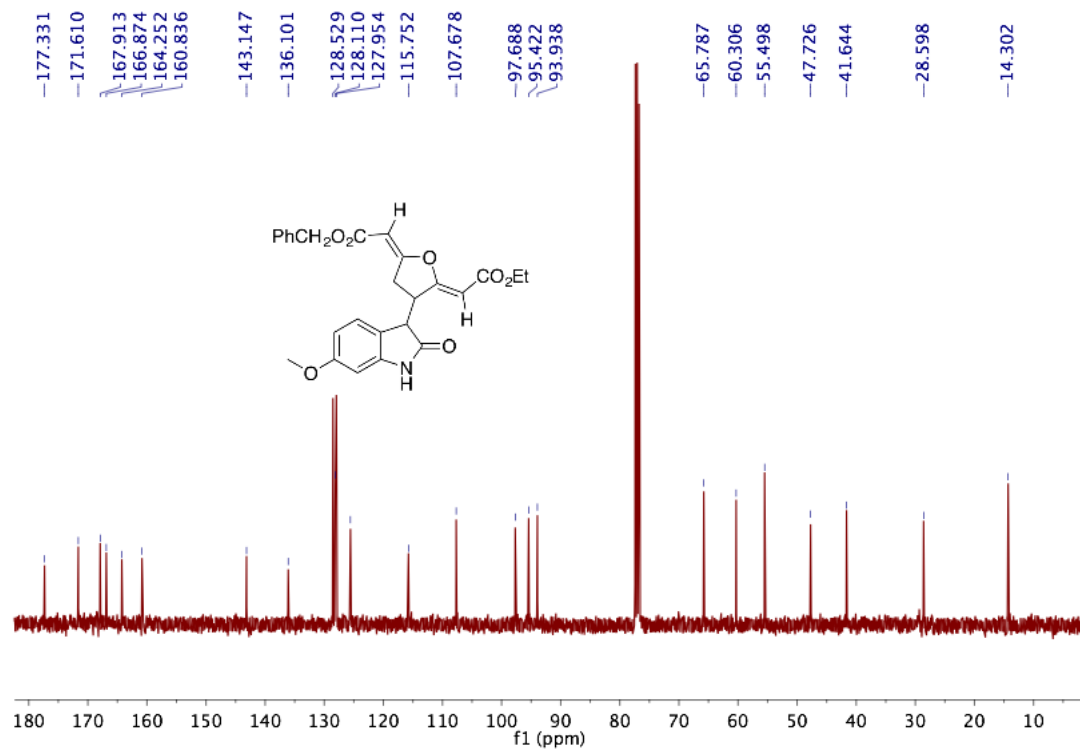

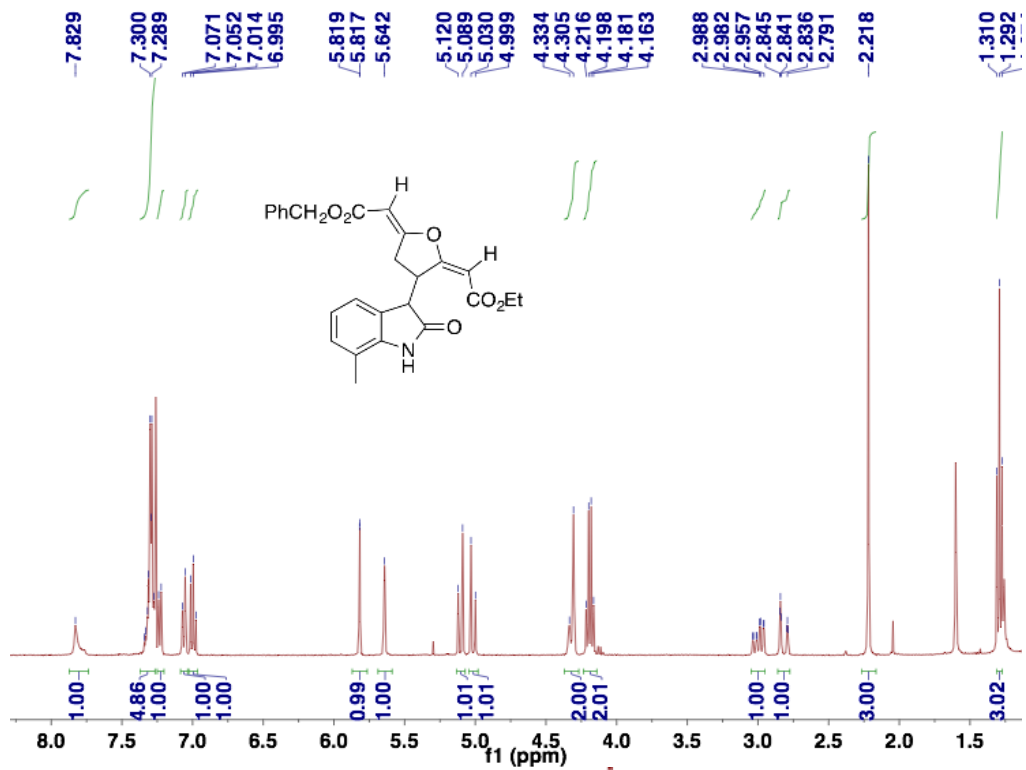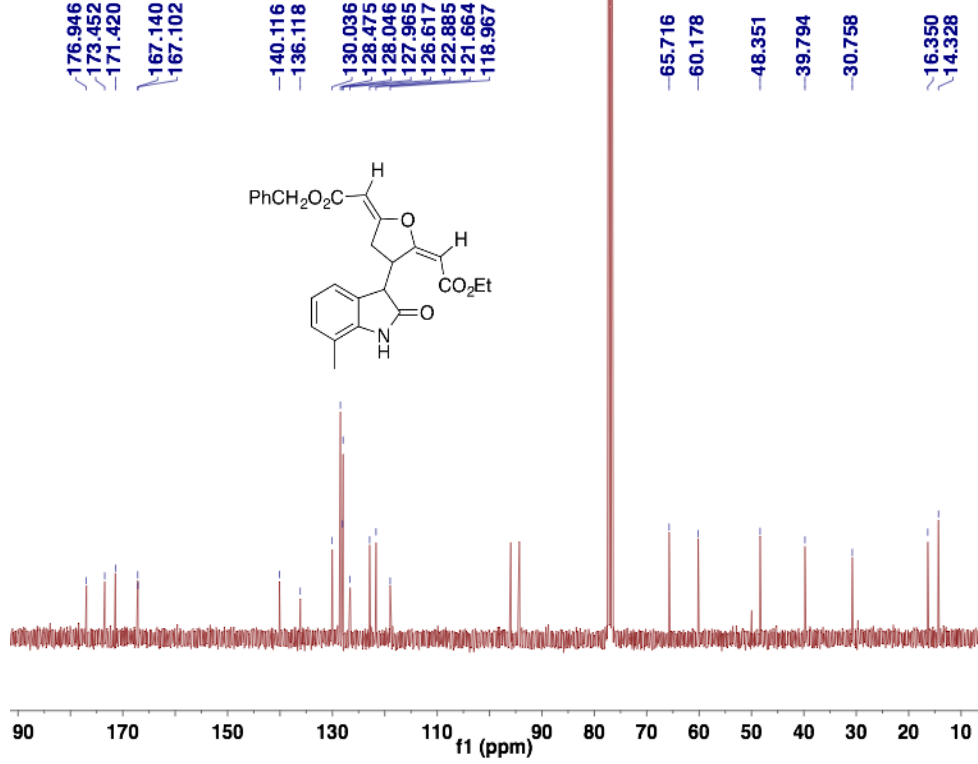

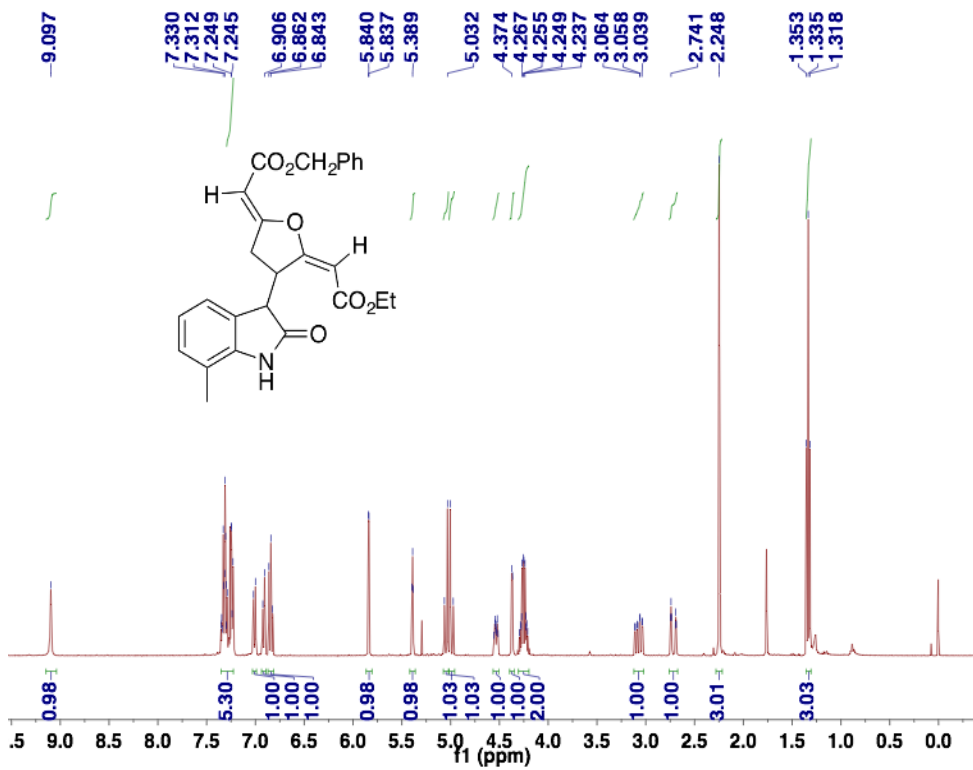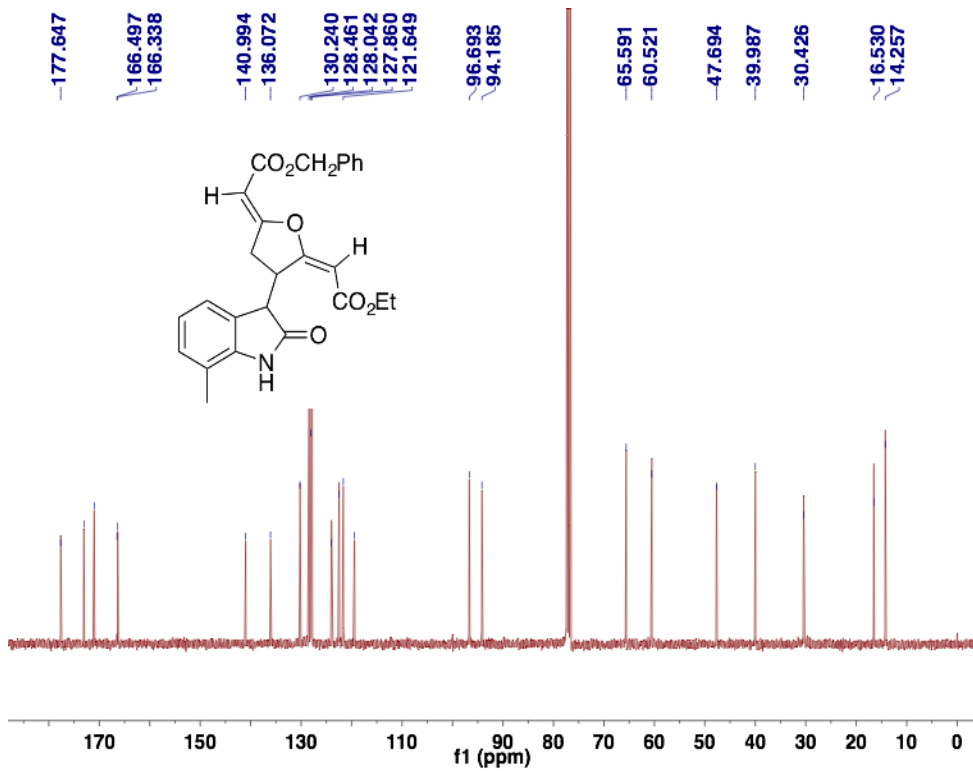



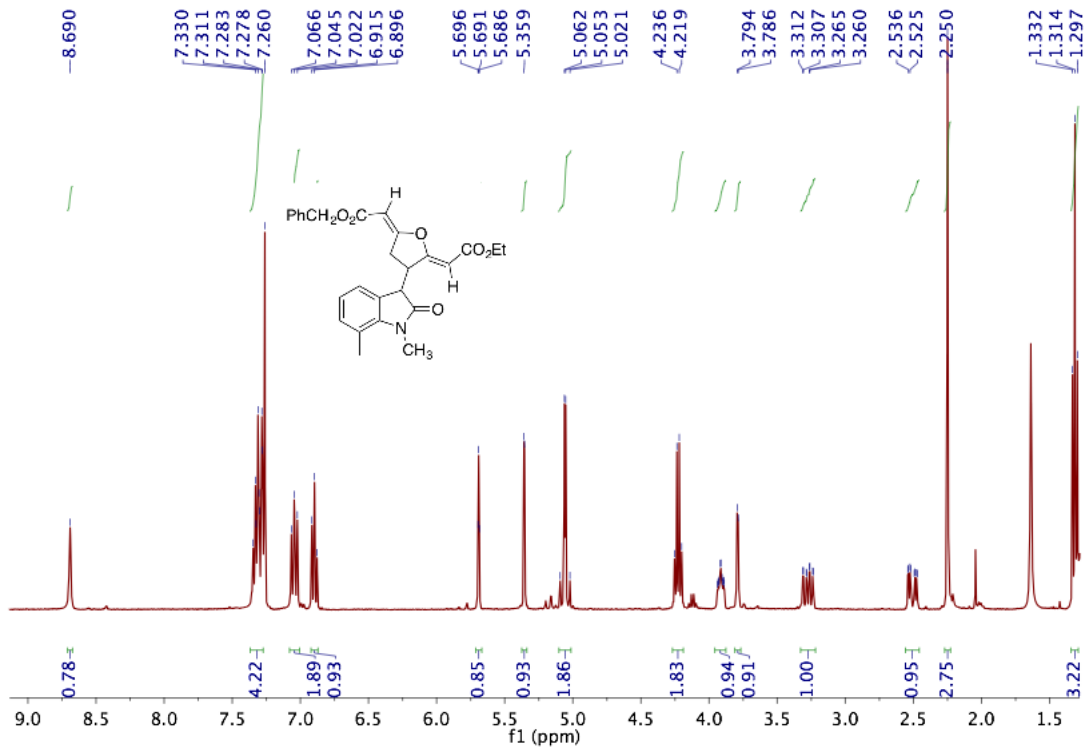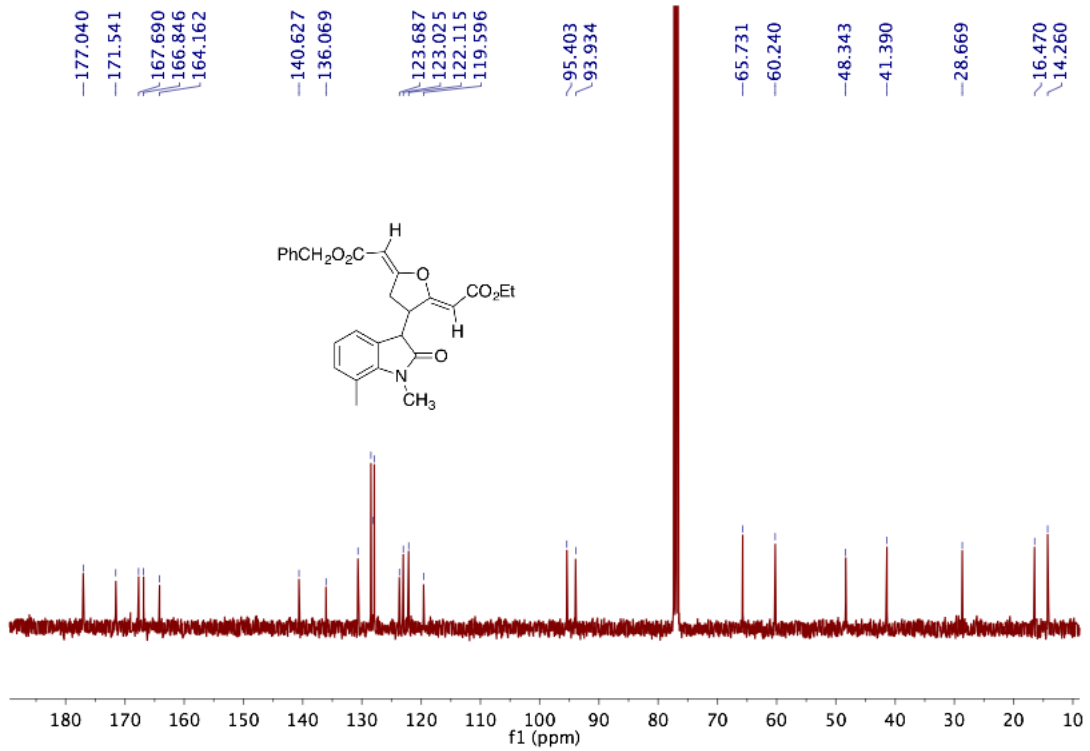

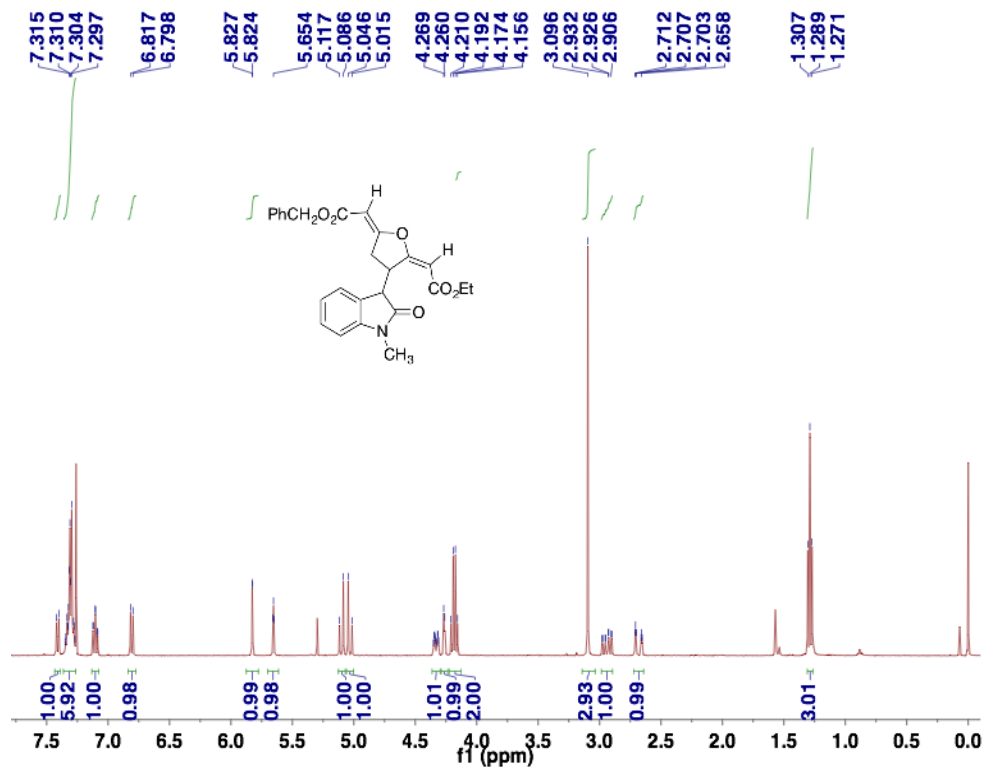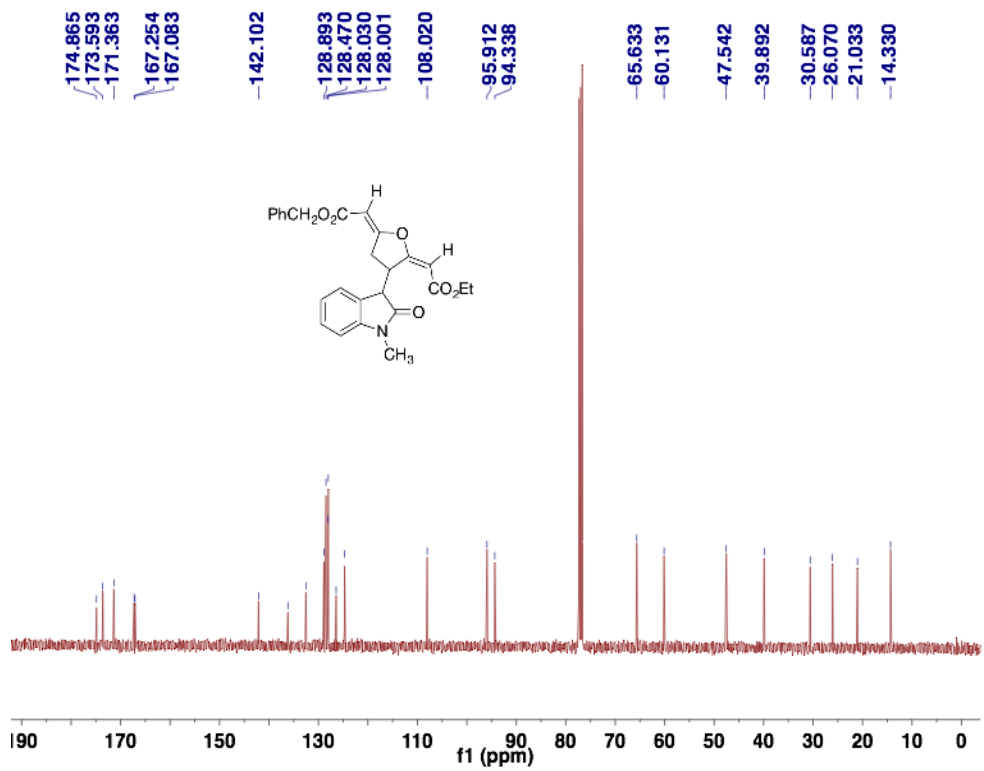



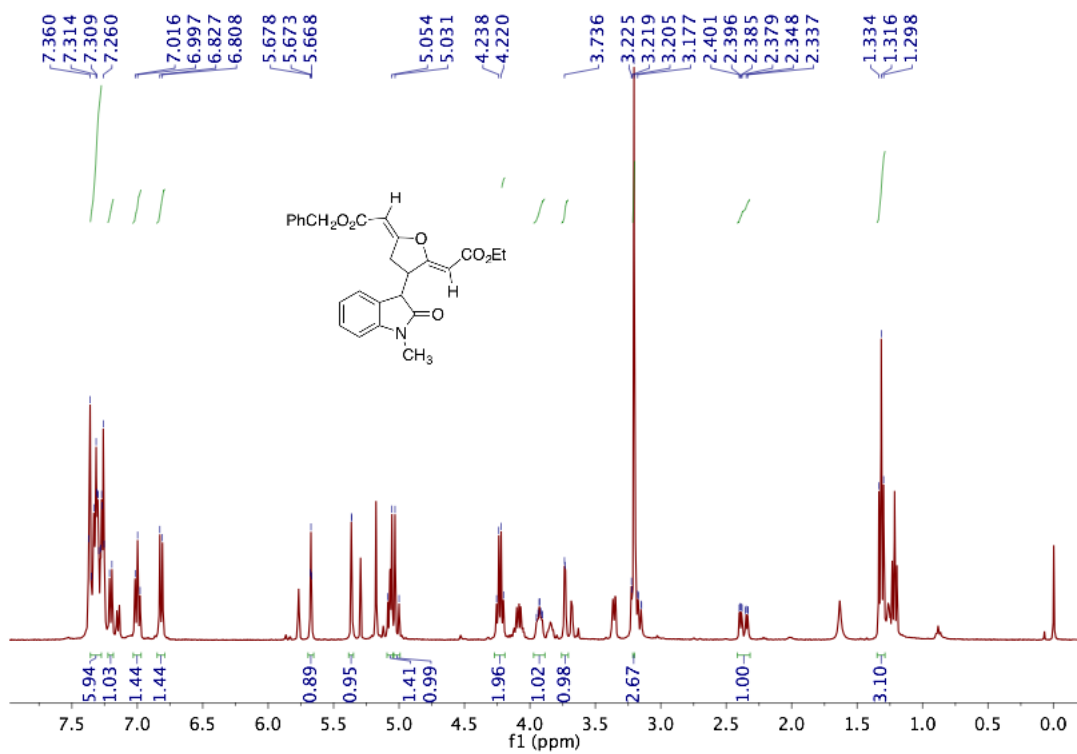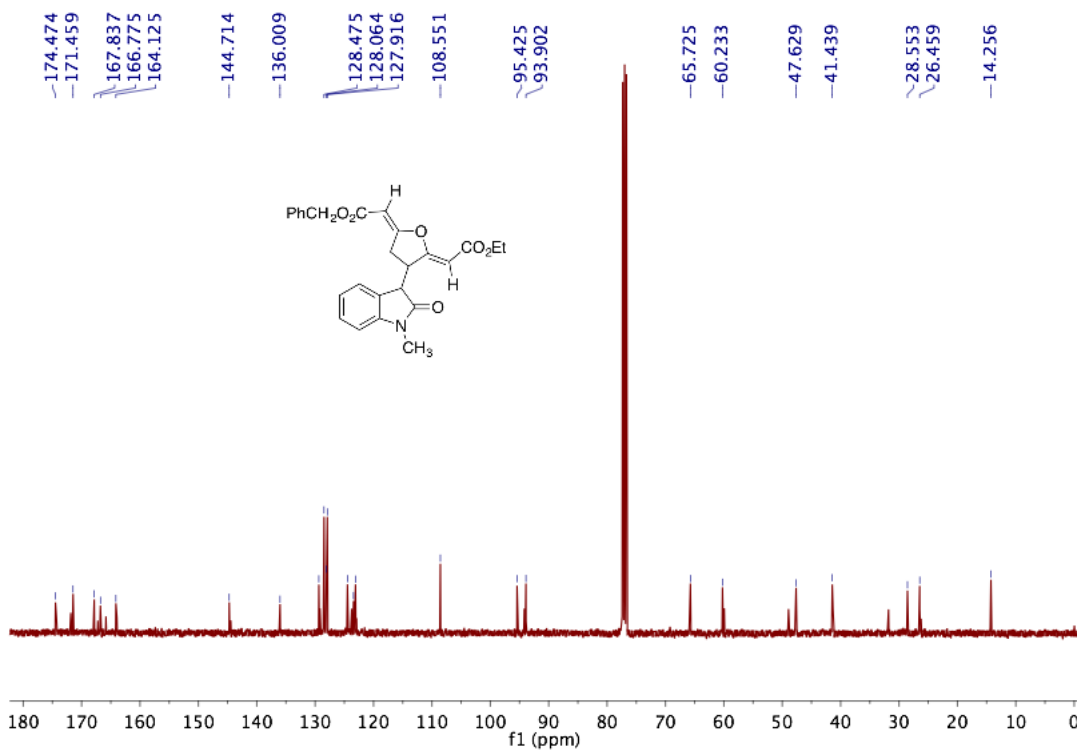

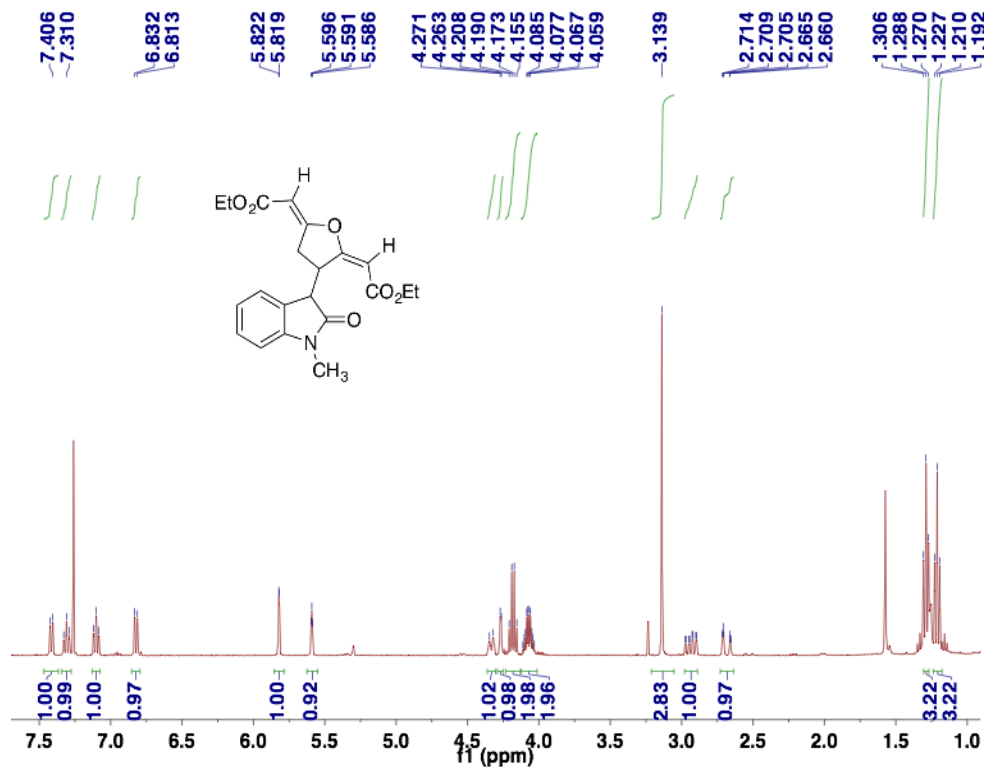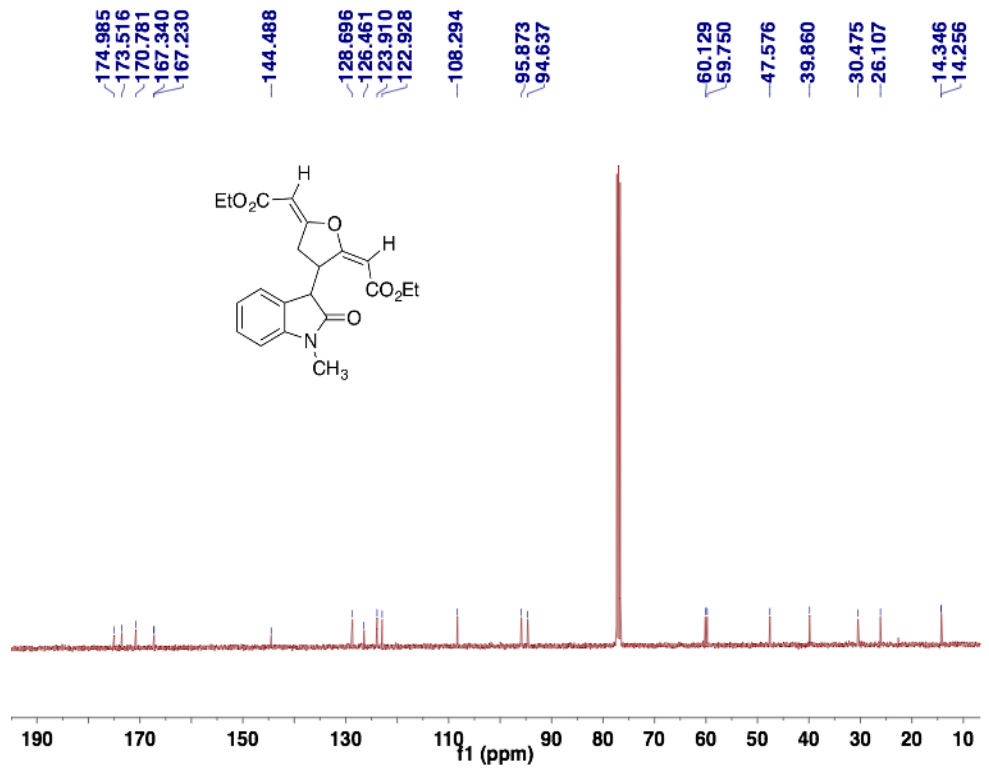

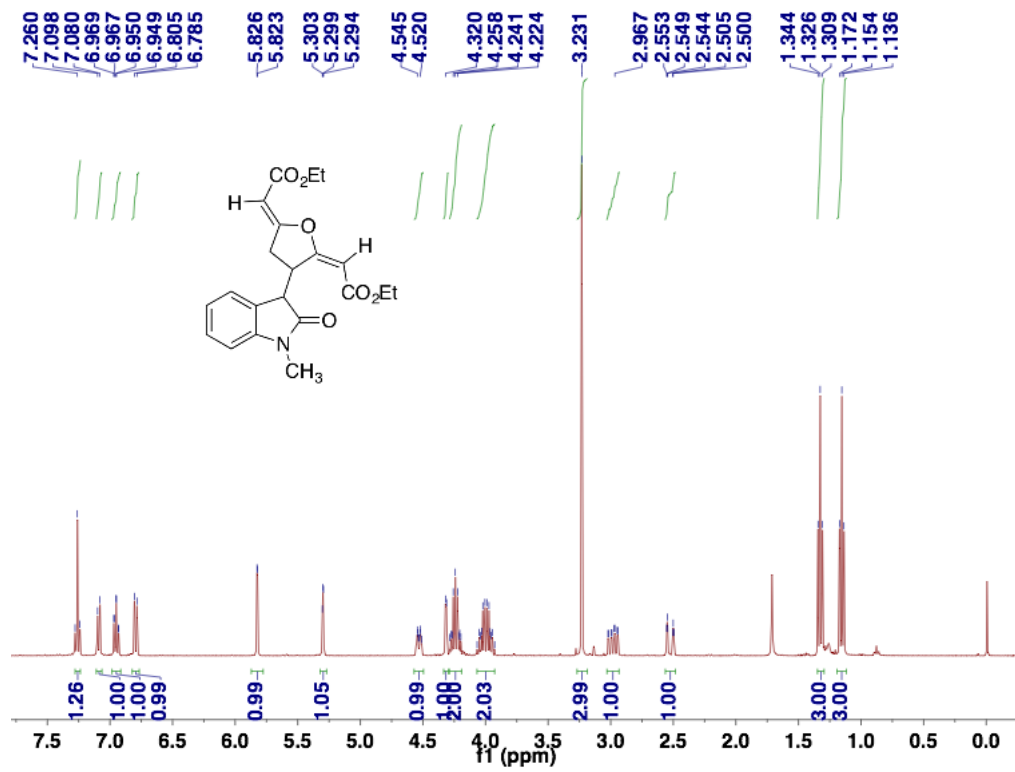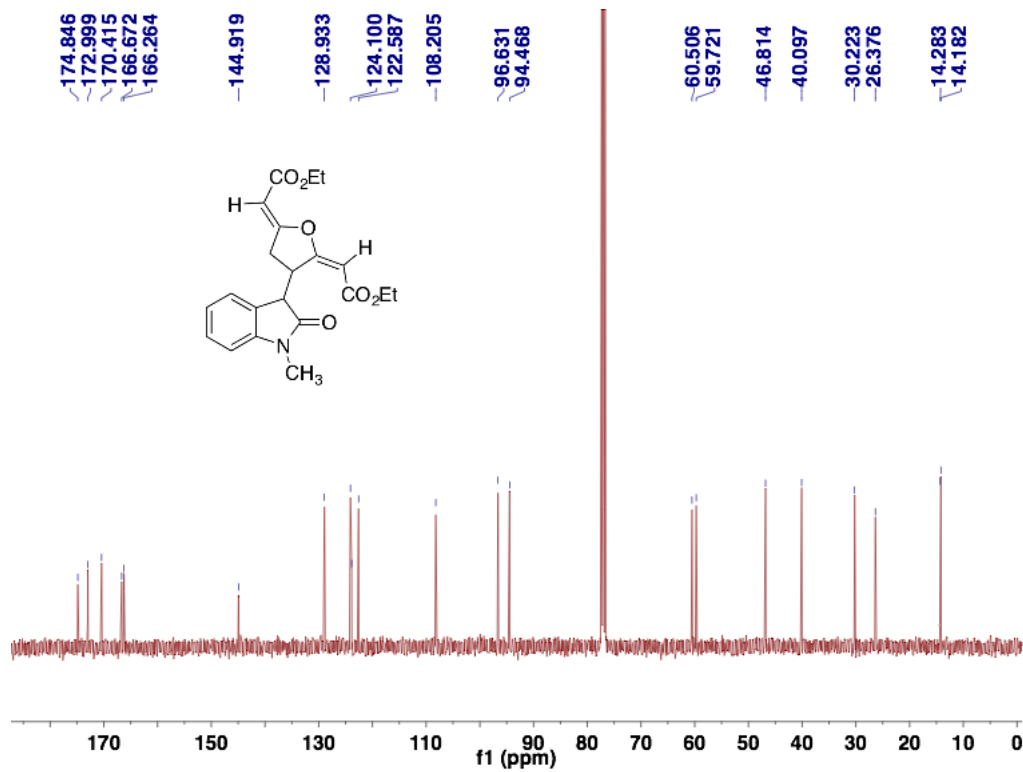

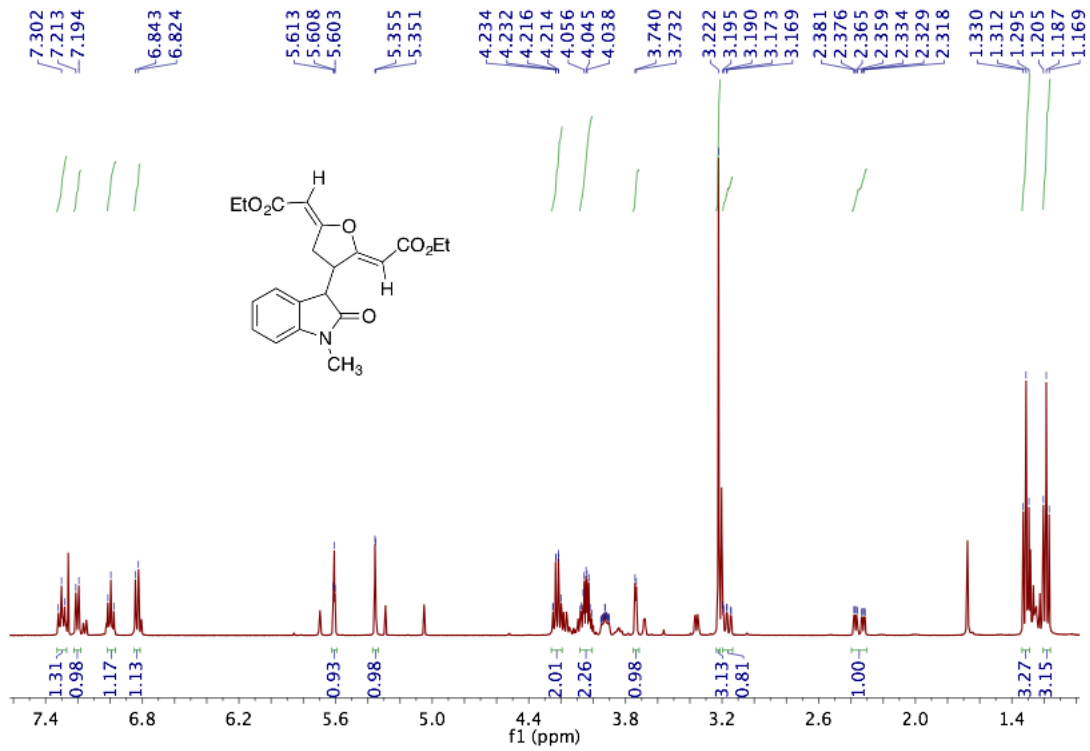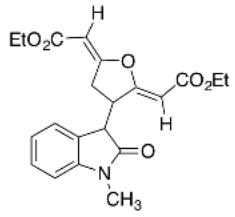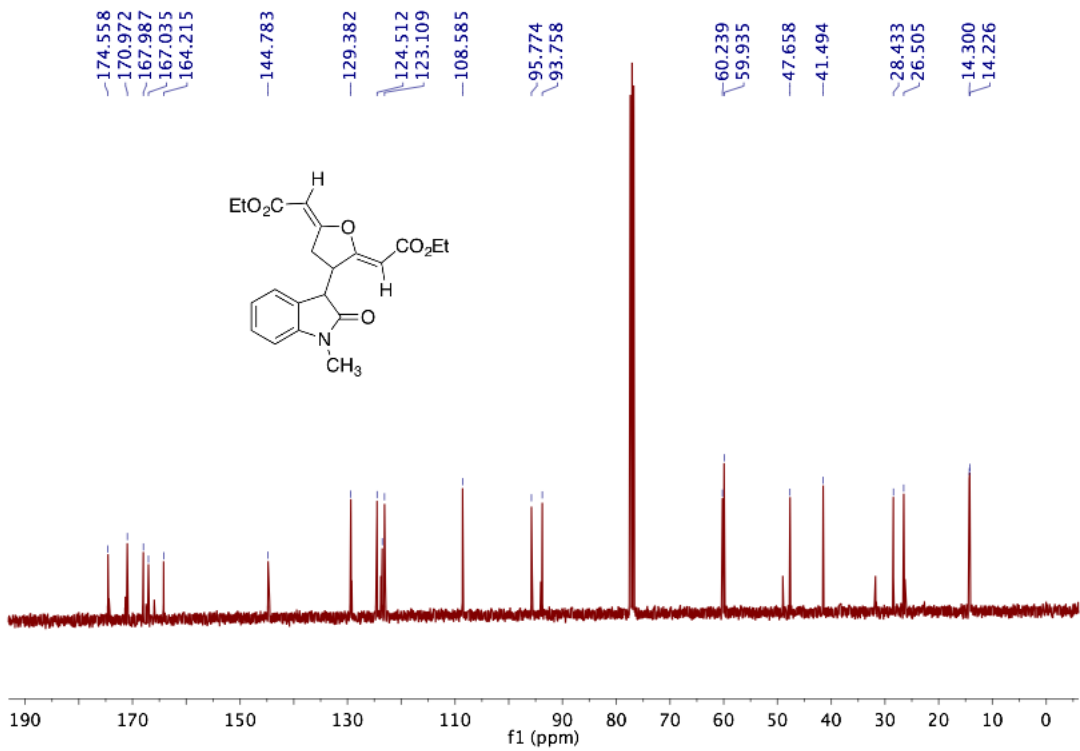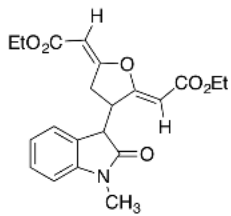

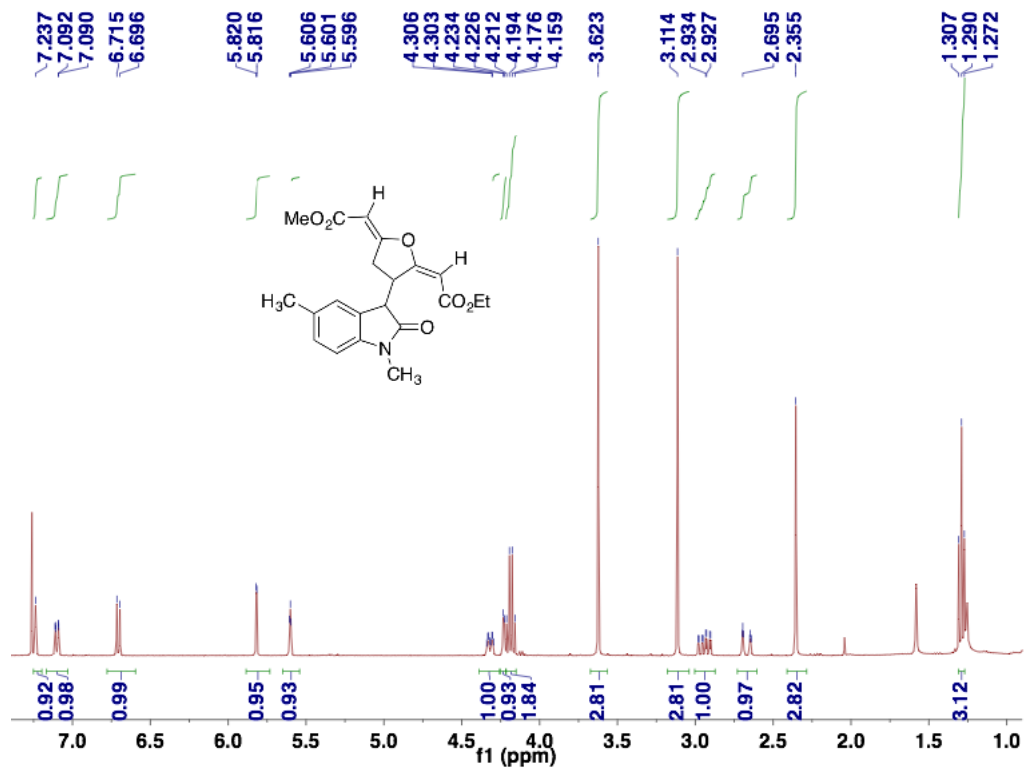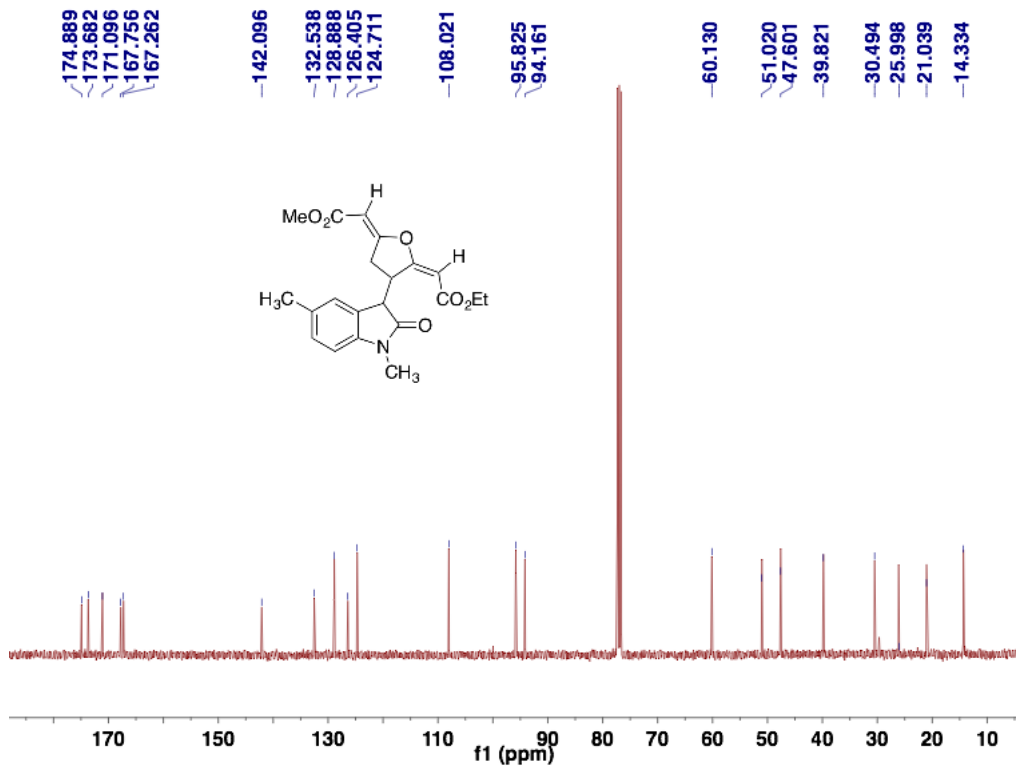



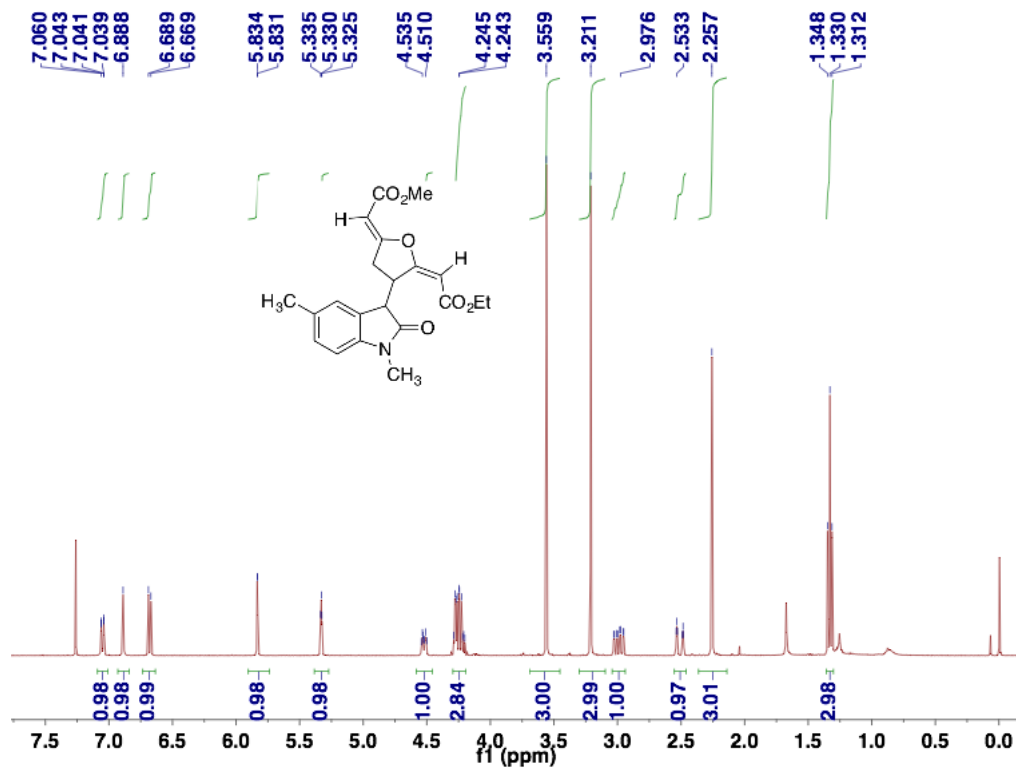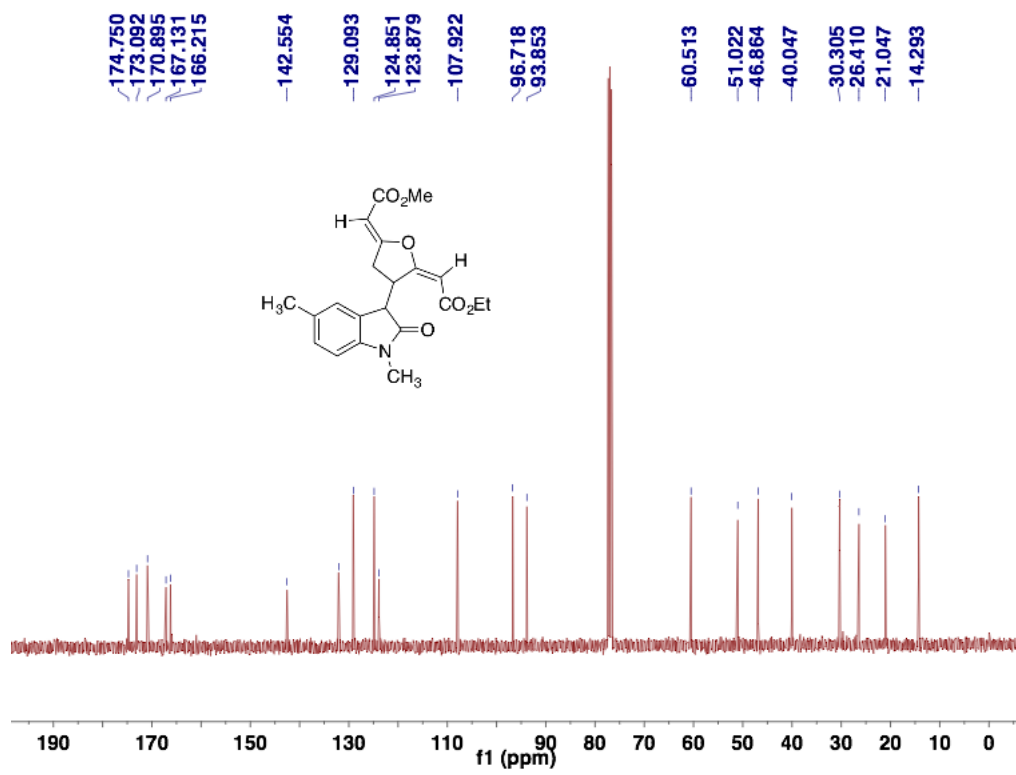

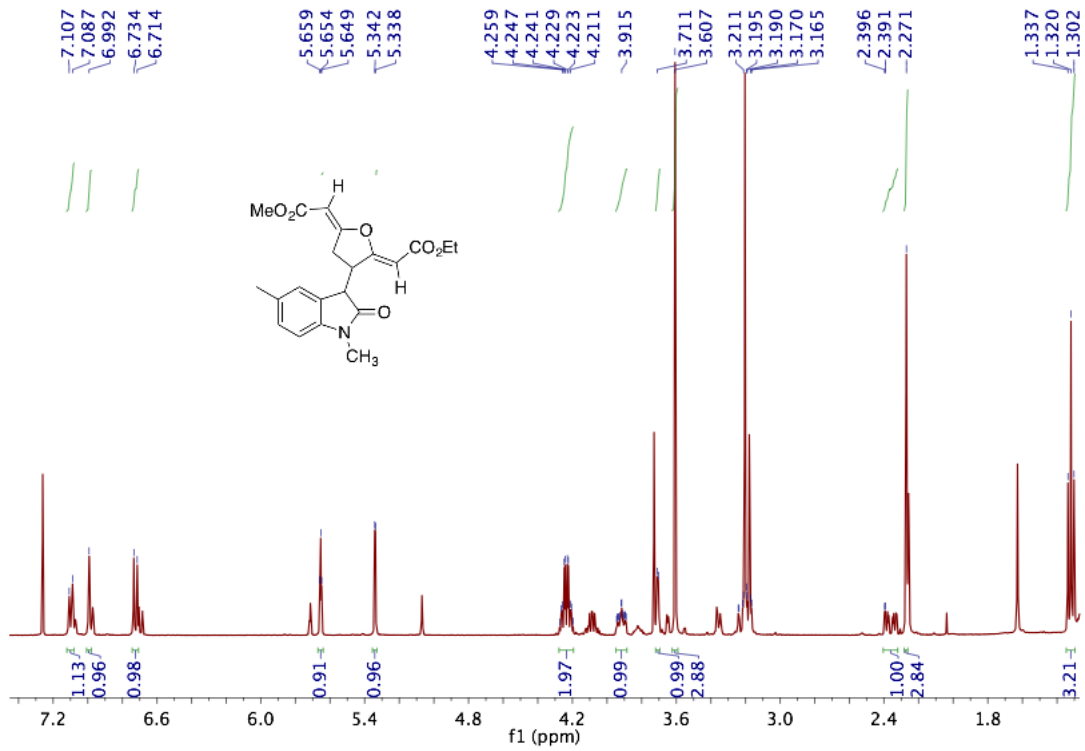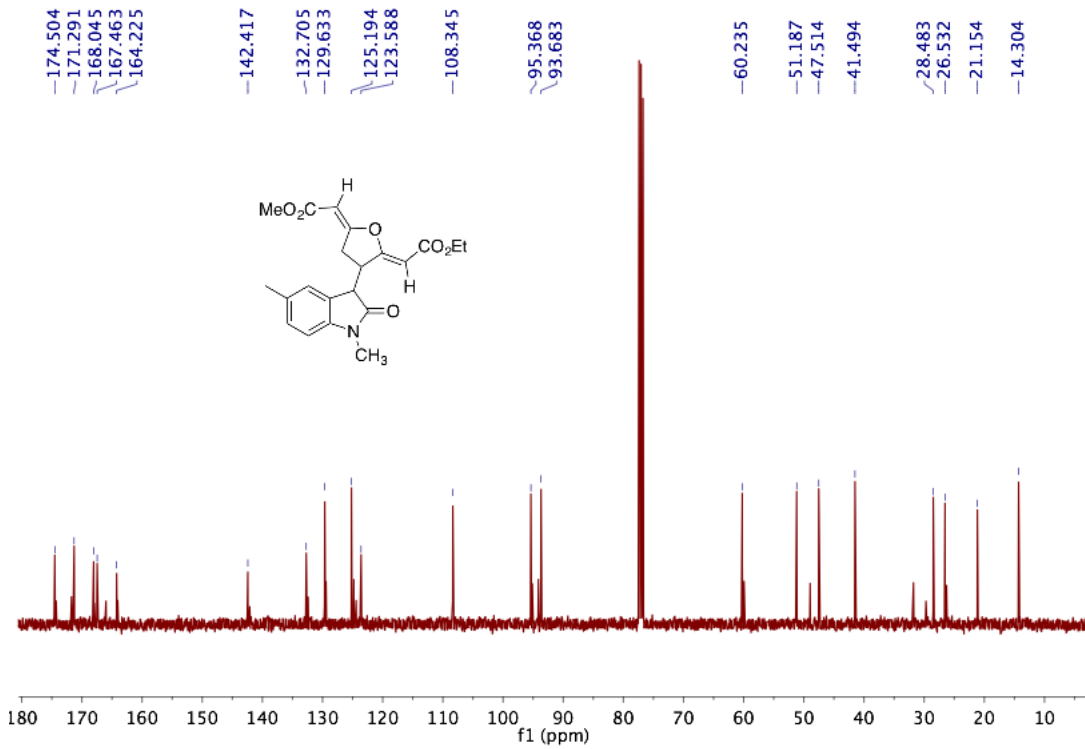

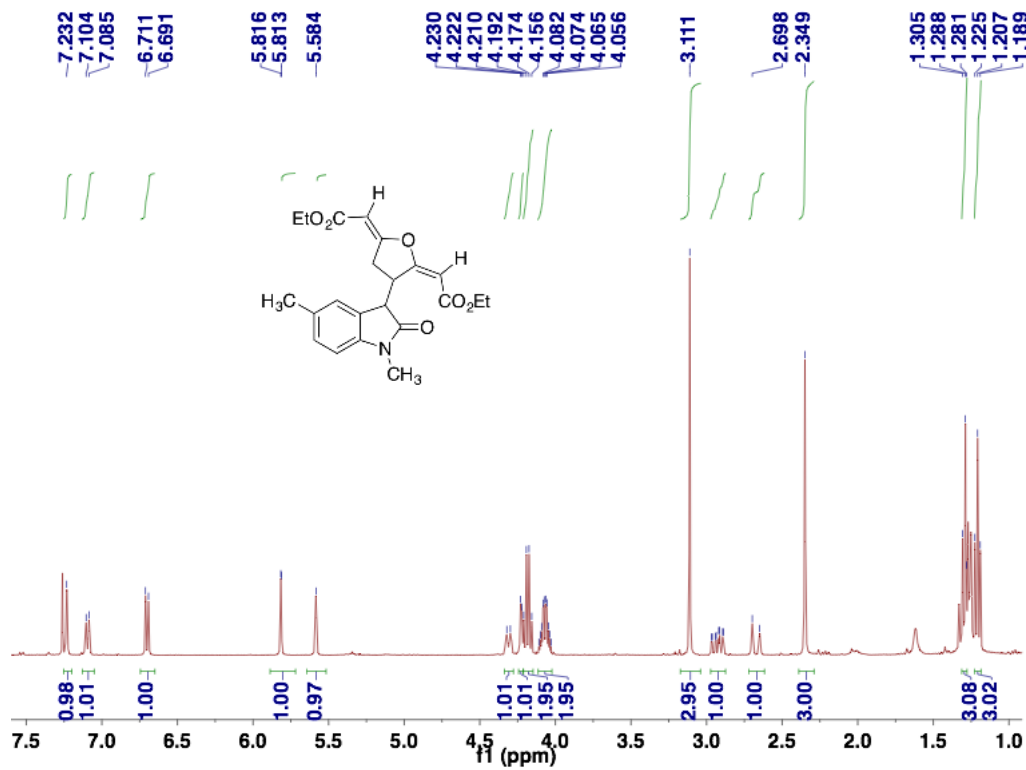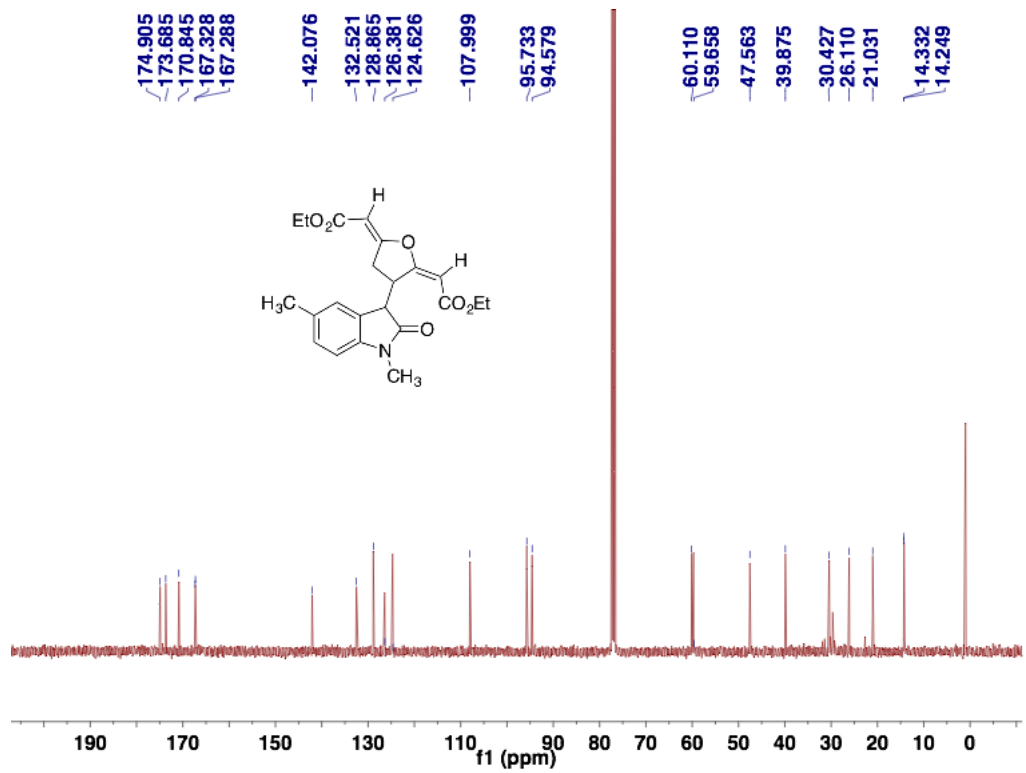

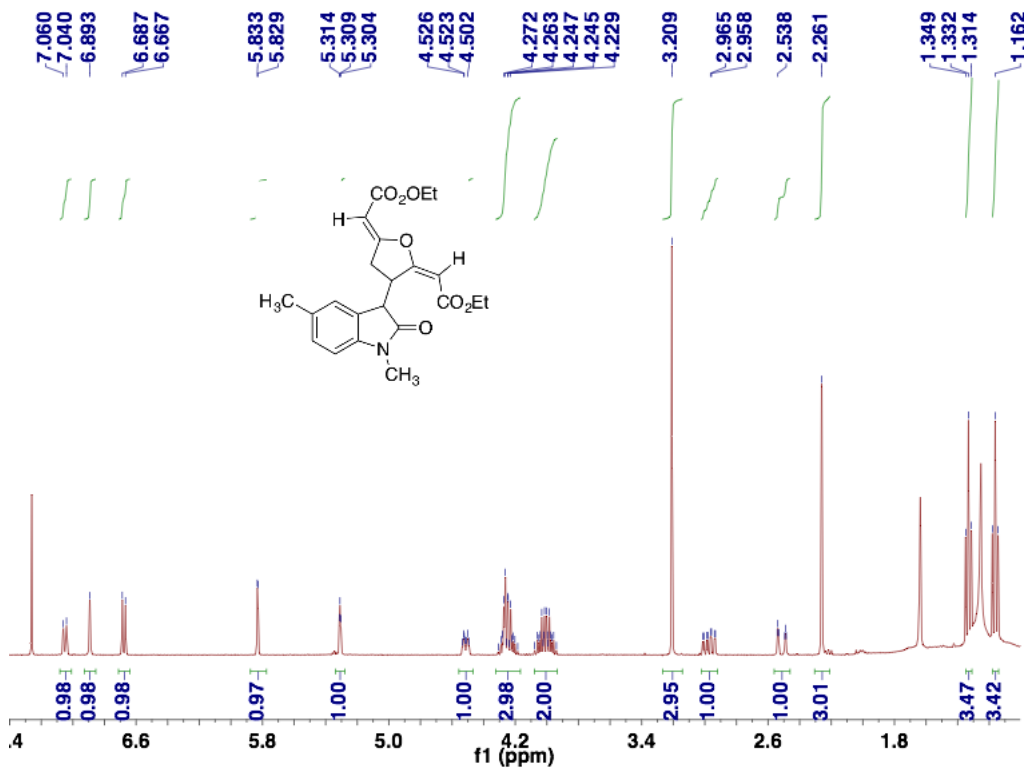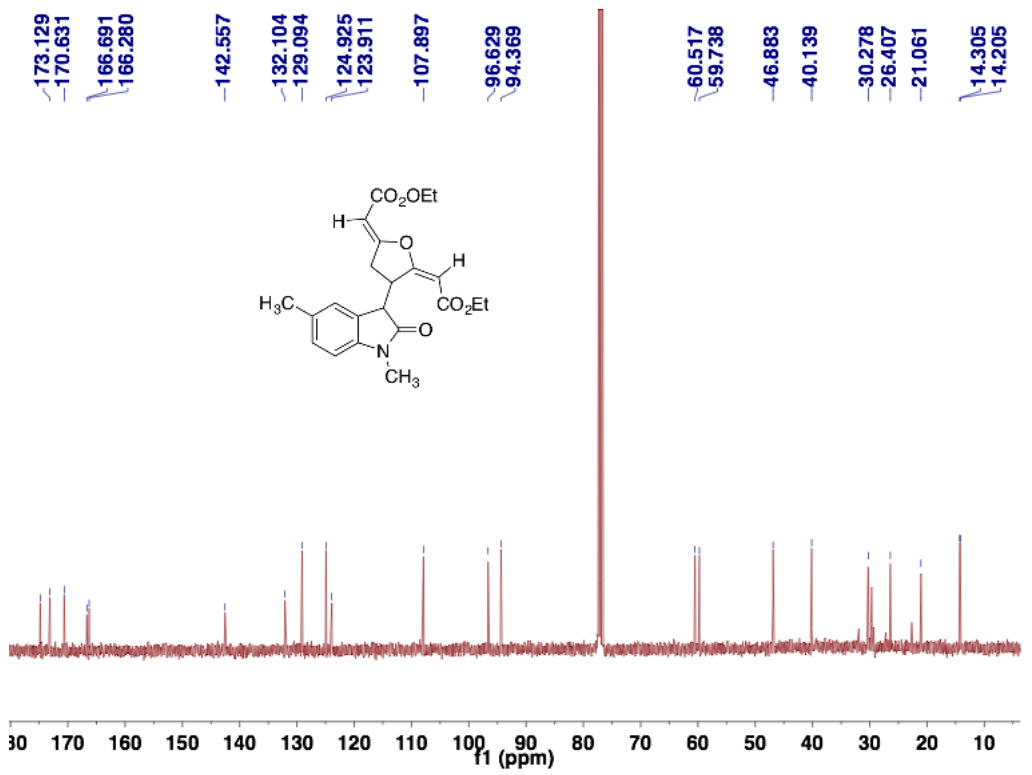

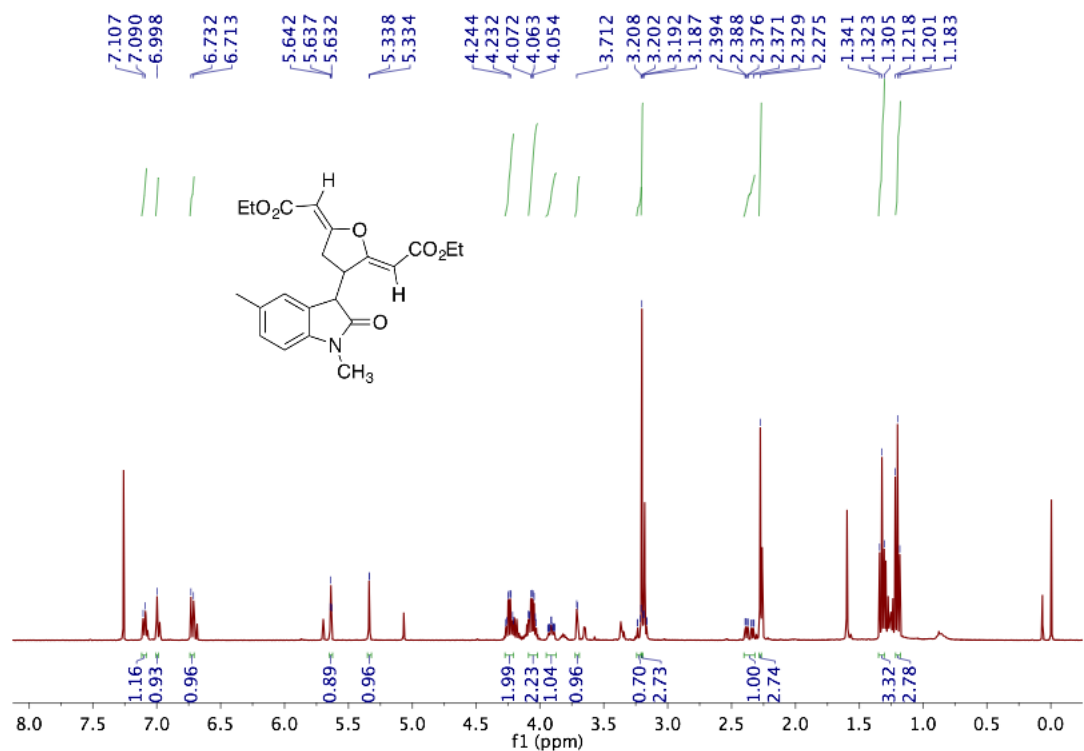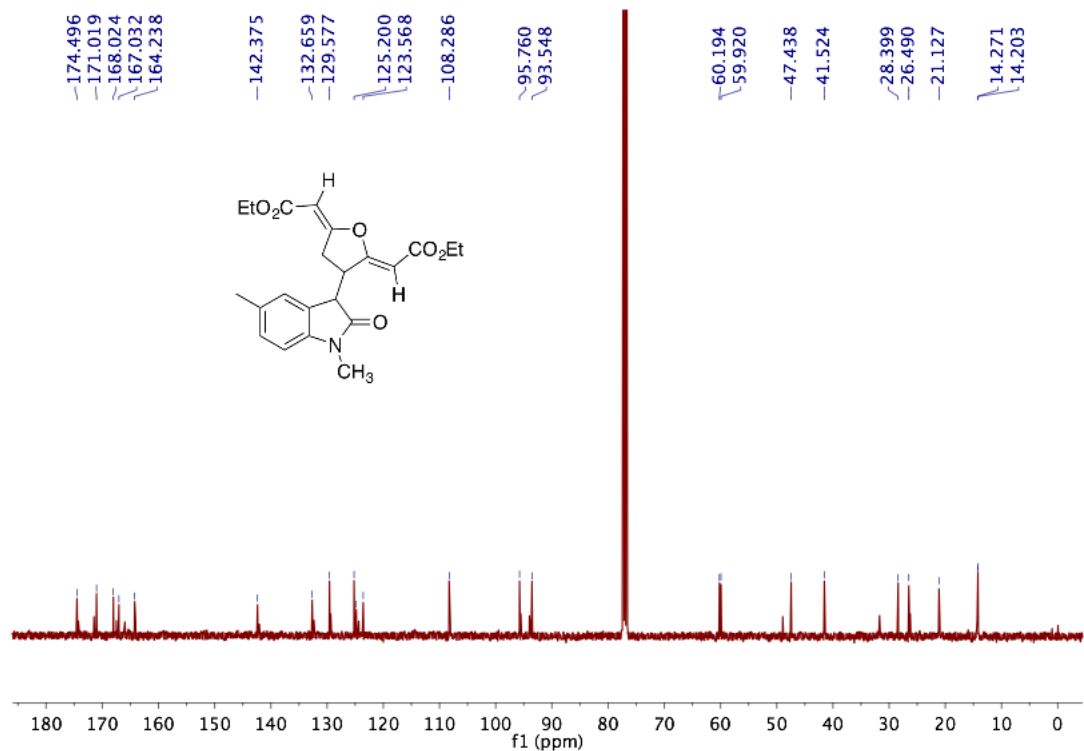

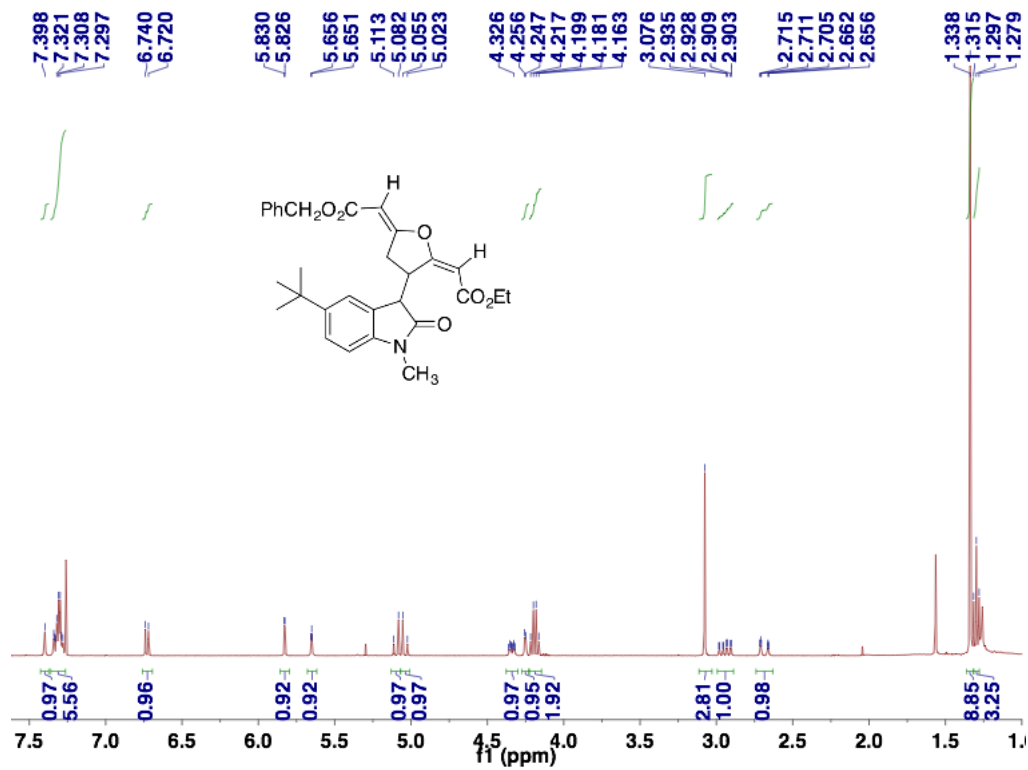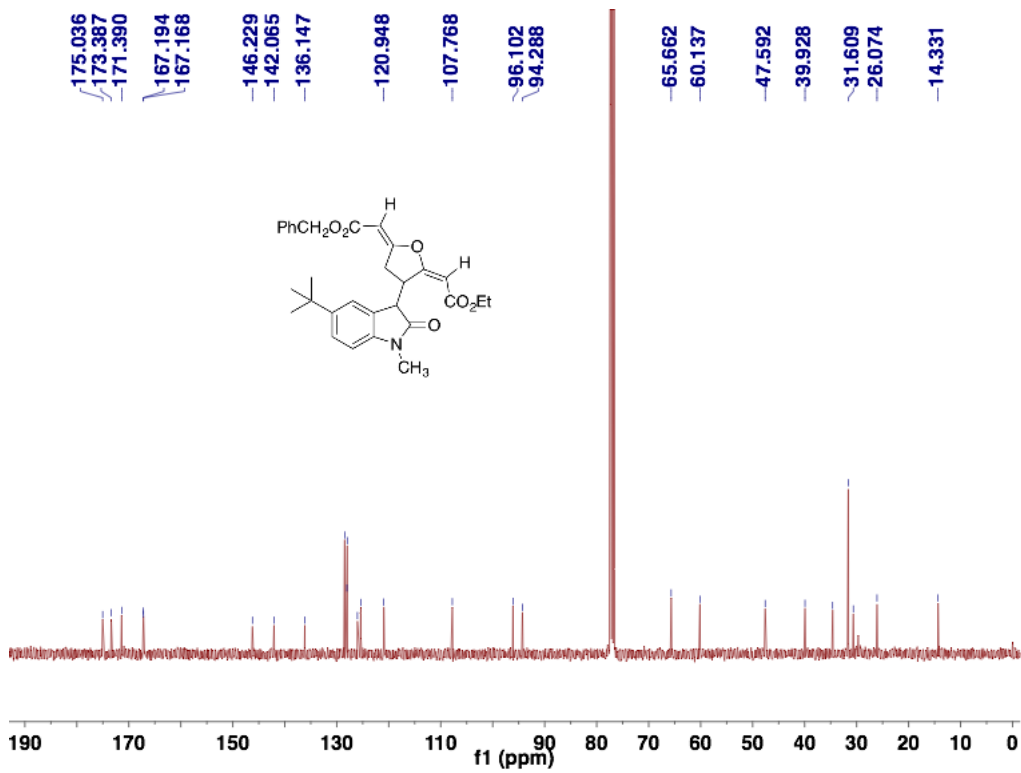

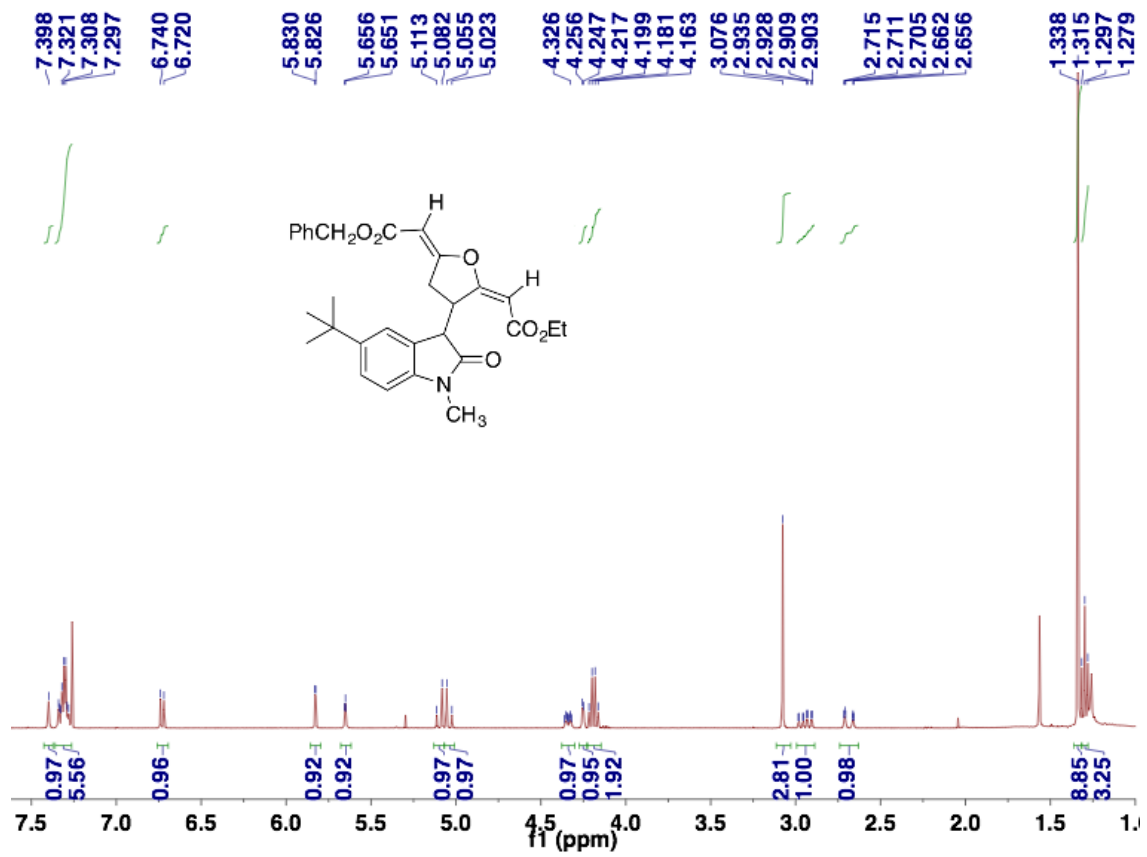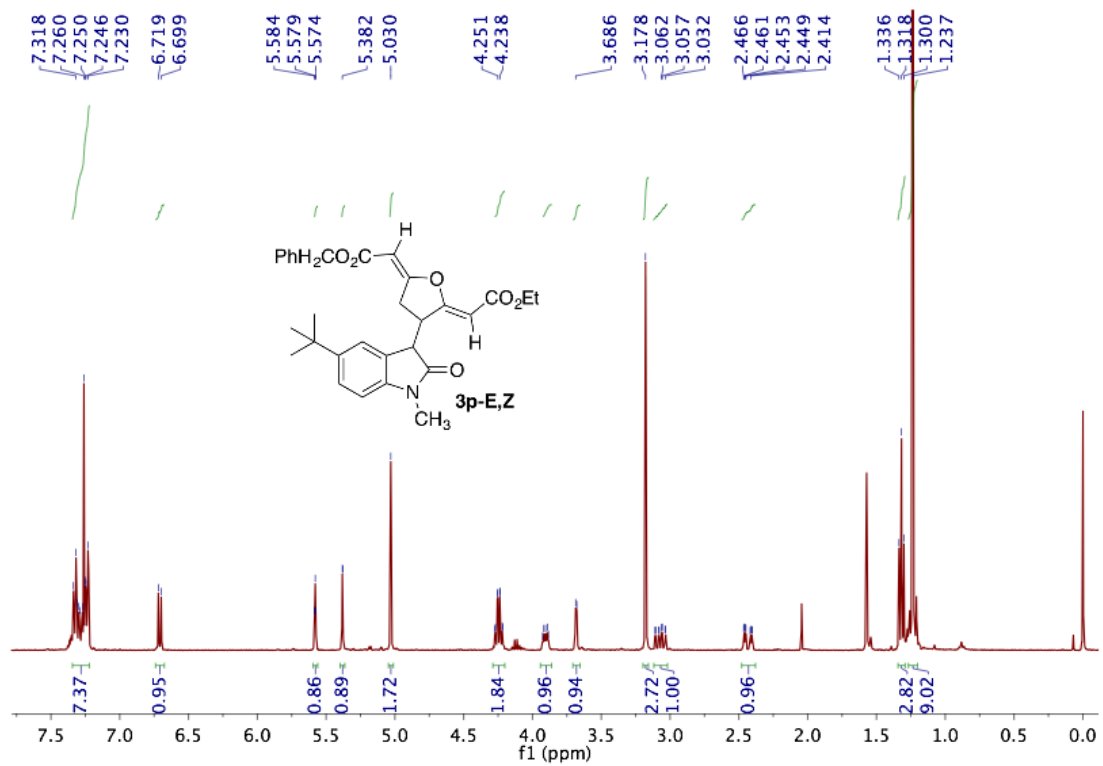

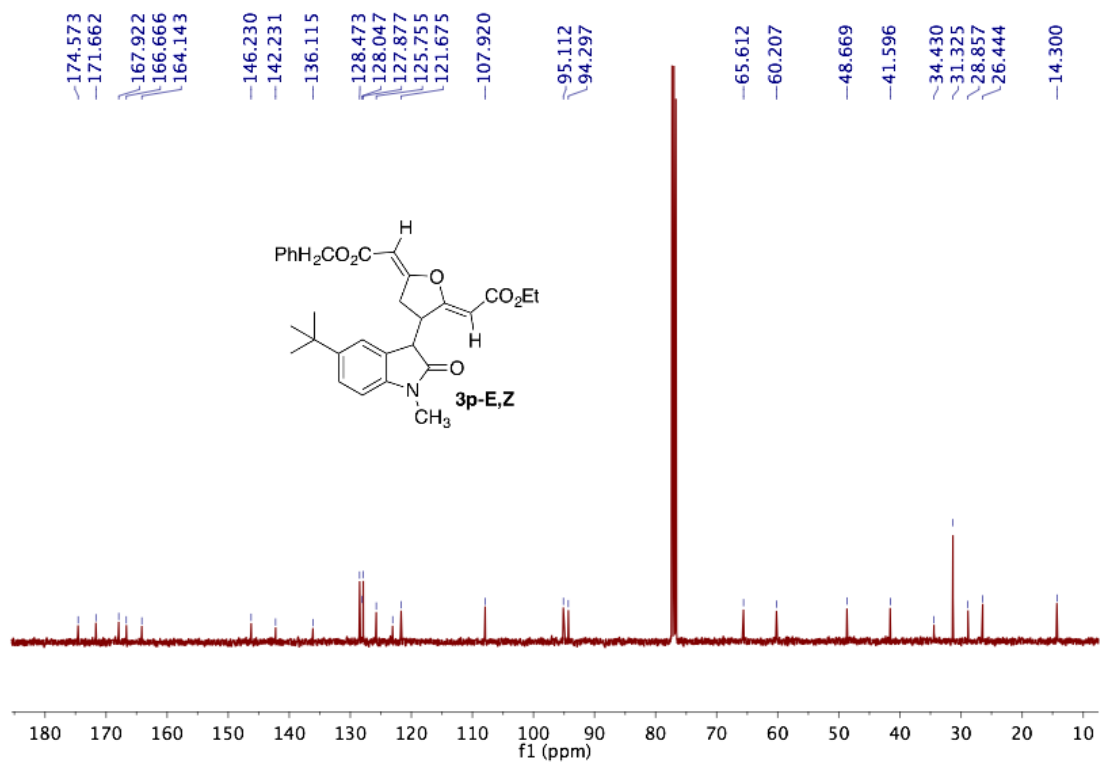

## 6. 2D NMR HMQC-3cZ,E

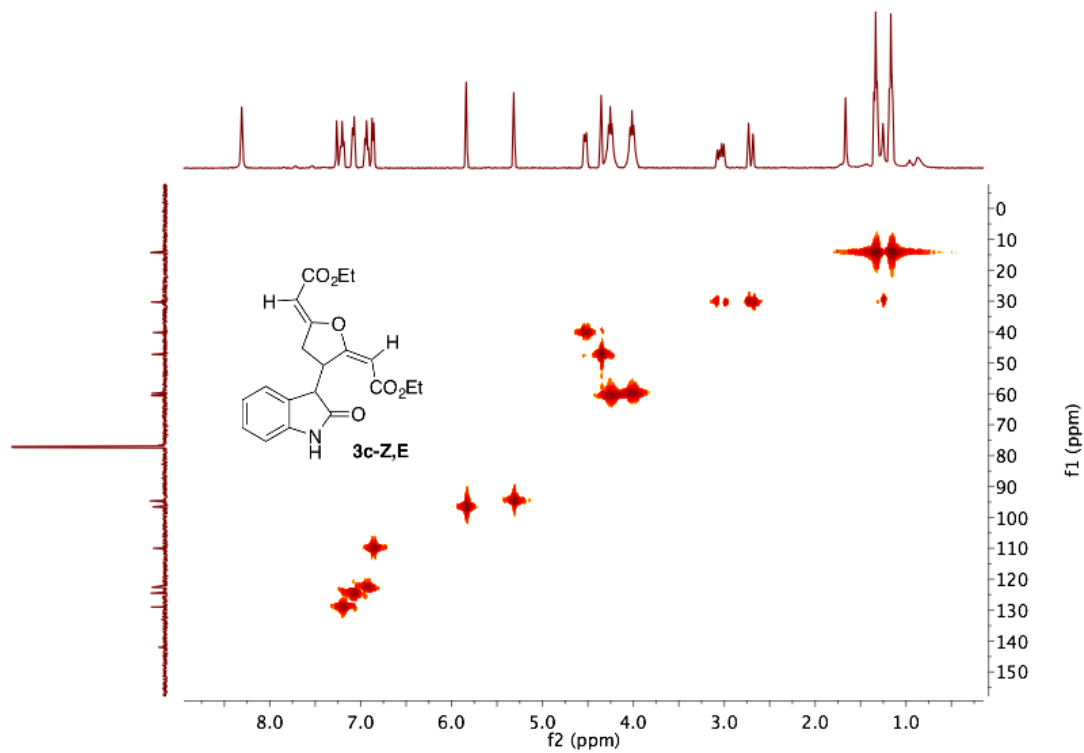



## Dept-135

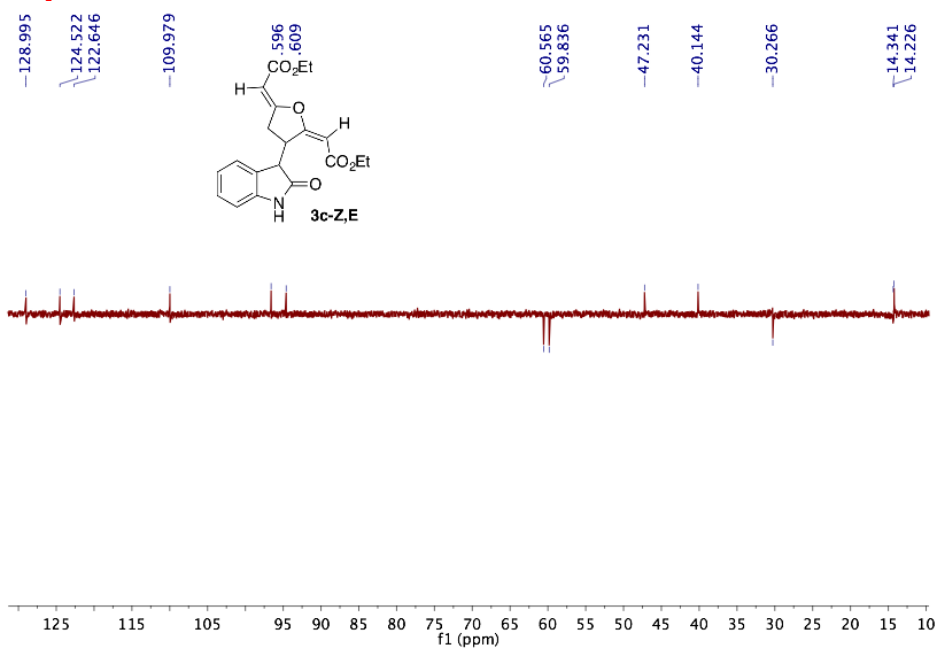

## NOESY-3c-Z,E

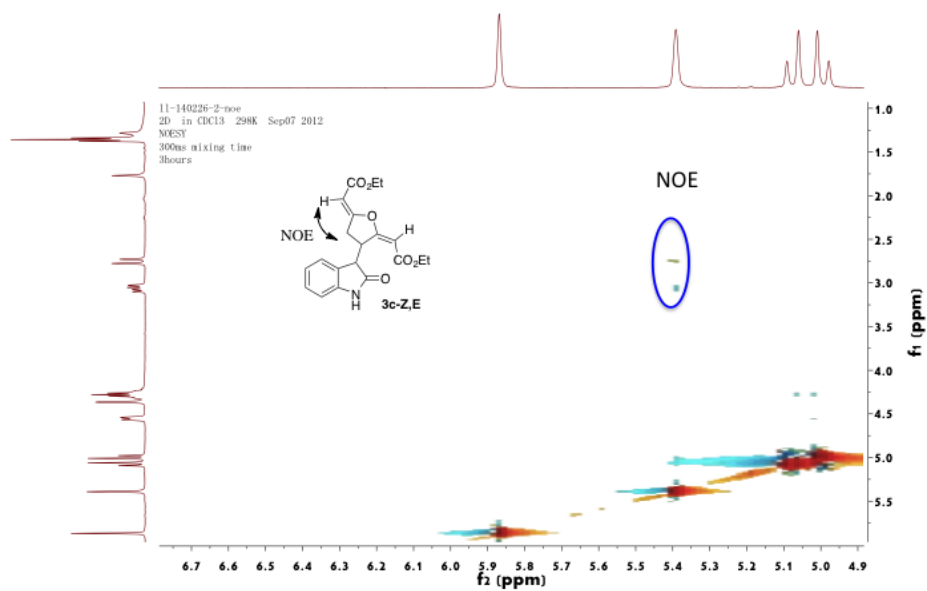

## 7. X-Ray crystal structure of 3l-E,E

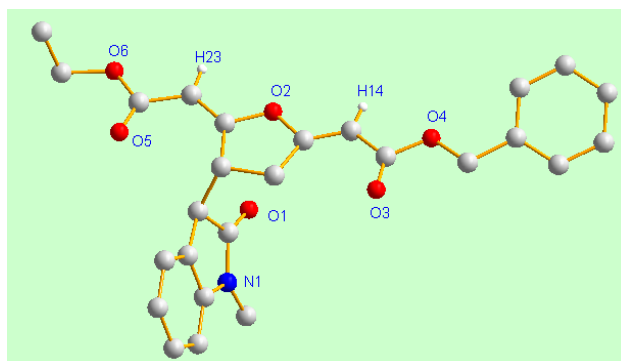

Supplement: c4ra09249j1.pdf [file c4ra09249j1.pdf]
